# Supplementary material for: Electrochemical reductive cascade cyclization of o-alkynylated derivatives for saturated amides/amines
Source: Royal Society of Chemistry journal article supplement (doi:10.1039/d3cc03350c), 2023-01-01
Supplement: d3cc03350c1.pdf [file d3cc03350c1.pdf]

## Supporting Information

### Electrochemical Reductive Cascade Cyclizations of *o*-Alkynylated Derivatives for Saturated Amides/Amines

Mandapati Bhargava Reddy<sup>†</sup>, Sakthivel Prabhu<sup>†</sup> and Ramasamy Anandhan<sup>\*a</sup>

*<sup>a</sup>Department of Organic Chemistry, University of Madras, Guindy Campus, Chennai – 600 025, Tamilnadu, India.*

Email: [ananthanramasamy@gmail.com](mailto:ananthanramasamy@gmail.com) (Dr. R. Anandhan).

<sup>†</sup>M.B.R. and S.P. contributed equally to this work.

#### Table of contents

|                                                                           |       |
|---------------------------------------------------------------------------|-------|
| 1. General considerations                                                 | - S2  |
| 2. General experimental procedure for the synthesis of starting materials | - S3  |
| 3. General procedure for the synthesis of isoindolin-1-ones               | - S4  |
| 4. General procedure for the synthesis of isoindole fused quinazolinones  | - S5  |
| 5. General procedure for scale up reaction                                | - S5  |
| 6. Optimization table for the synthesis of isoindole fused quinazolinones | - S6  |
| 7. X- ray crystallographic studies of compound                            | - S7  |
| 8. Intermediates isolation and trapping experiments                       | - S9  |
| 9. CV experiments                                                         | - S16 |
| 10. Spectral data                                                         | - S17 |
| 11. References                                                            | - S40 |
| 12. Copies of <sup>1</sup> H, <sup>13</sup> C NMR & HRMS spectra          | - S41 |

## 1. General considerations

The  $^1\text{H}$  and  $^{13}\text{C}$  NMR spectra were recorded in  $\text{CDCl}_3$  solvent on Bruker Spectrometers 300, 400, 500 MHz (300, 400, 500 for  $^1\text{H}$  NMR and 75, 101, 125 MHz for  $^{13}\text{C}$  NMR), respectively with TMS as an internal standard. Mass spectra were recorded on Xevo G2S Q-TOF spectrometer. TLC was performed using Merck pre-coated TLC plates (Merck 60 F254) and detected under UV light. Column chromatography was carried out with silica gel (100-200 mesh). Reagents and solvents were purified as per the standard procedures. IKA Electrasyn 2.0 was used to perform electrochemical reactions.

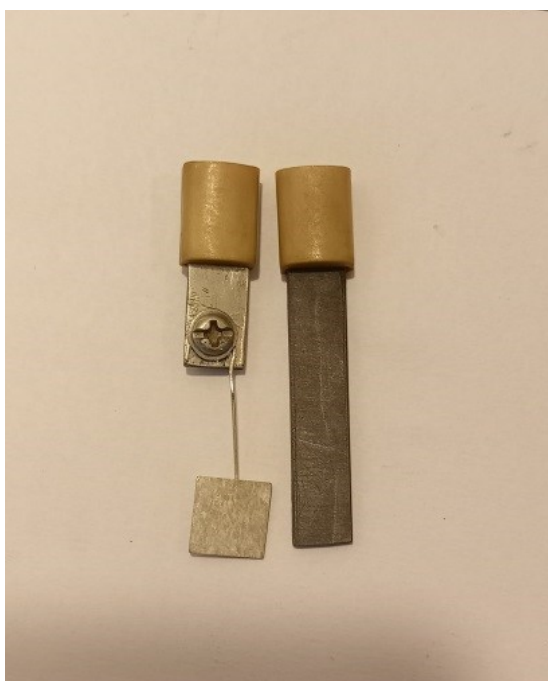

a) Electrodes

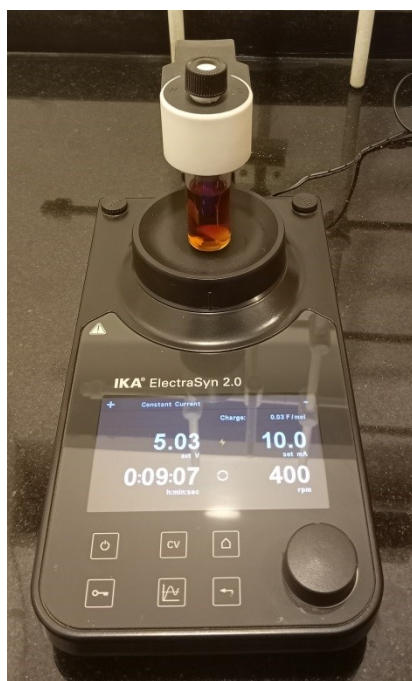

b) Reaction setup

## 2. General procedure for the synthesis of starting materials

### 2.1 General procedure A for the synthesis of 2-iodo *N*-aryl/alkylbenzamides

All the starting materials were prepared according to the literature procedure<sup>1,2</sup>

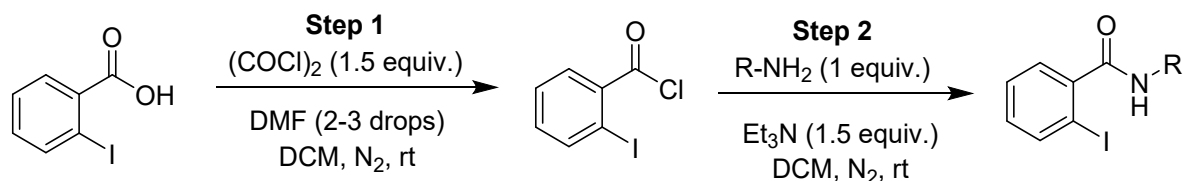

#### Step 1:

To a solution of 2-iodobenzoic acid (8.0 mmol, 1 equiv.) in DCM, oxalyl chloride (12 mmol, 1.5 equiv.) and 2-3 drops of DMF were added under nitrogen atmosphere. The reaction mixture was allowed to stir at room temperature for 4-5 h. Then the solvent was evaporated under reduced pressure to afford 2-iodobenzoyl chloride. The crude product was used for the next step without further purification.

#### Step 2:

To a solution of 2-iodobenzoylchloride (1.8 mmol, 1equiv.) in DCM, triethylamine (2.8 mmol, 1.5 equiv.) and anilines (1.8 mmol, 1equiv.) were added under nitrogen atmosphere. The resulting mixture was allowed to stir at room temperature for 6-8 h. Then, 10% HCl (20 mL) was added, extracted with DCM and dried over anhydrous Na<sub>2</sub>SO<sub>4</sub>. The solvent was evaporated under reduced pressure to afford the 2-iodo-*N*-substituted benzamides.

### 2.2 General procedure B for the synthesis of *o*-alkynylbenzamides<sup>1,2</sup>

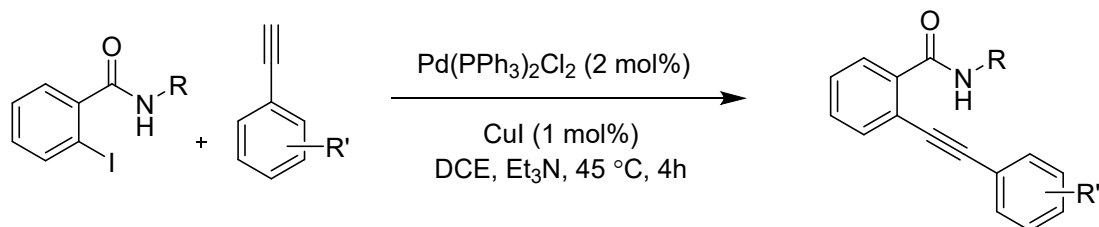

To a solution of 2-iodo-*N*-substituted benzamides (0.6 mmol, 1equiv.) in DCE (5 mL), triethylamine (2.4 mmol, 4 equiv.) were added Pd(PPh<sub>3</sub>)<sub>2</sub>Cl<sub>2</sub> (2 mol%) and CuI (1 mol%) under N<sub>2</sub> atmosphere and allowed to stir at room temperature for 20 minutes, then phenyl acetylenes (0.68 mmol, 1.1 equiv.) was added dropwise to the reaction mixture and heated at 45 °C on oil

bath for 4h. After completion of the reaction (monitored by TLC), the crude reaction mixture was passed through celite and washed with ethylacetate. Then the solvent was evaporated under reduced pressure. The crude product was purified by silica column chromatography using EtOAc/Hexanes (5:95) as an eluent to furnish the corresponding *o*-alkynylbenzamides.

### 2.3 General procedure C for the synthesis of *o*-alkynylated benzaldehydes<sup>3</sup>

To a solution of 2-bromobenzaldehyde (1.6 mmol, 1 equiv.) in triethylamine, Pd(PPh<sub>3</sub>)<sub>2</sub>Cl<sub>2</sub> (2 mol%), CuI (1 mol%) was added under nitrogen atmosphere. The mixture was stirred at room temperature for 15 minutes then, phenylacetylenes (1.7 mmol, 1.1 equiv.) was added in drops to the reaction mixture and allowed to stir at 70 °C in oil bath for 4 hours. After completion of reaction (monitored by TLC), the crude reaction mixture was passed through pad of celite and solvent was evaporated under reduced pressure. The crude product was purified by silica column chromatography using EtOAc/Hexanes as an eluent to furnish the corresponding *o*-alkynylated benzaldehydes.

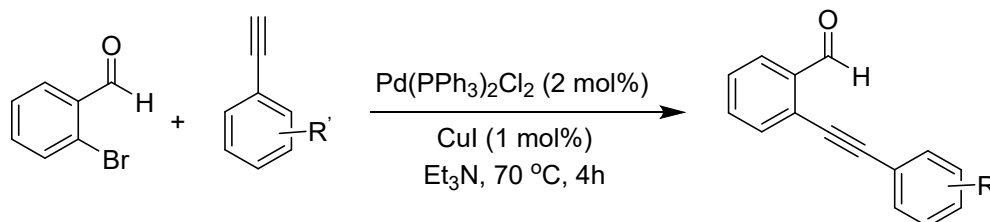

### 3. General procedure D for the synthesis of isoindolin-1-ones

To an oven dried reaction vial was charged with **1** (0.16 mmol, 1 equiv.), DIPEA (0.25 mmol, 1.5 equiv.), TBAPF<sub>6</sub> (0.16 mmol, 1 equiv.) and ACN (8 mL). The reaction mixture was electrolyzed with Pt plate as both anode and cathode under constant current electrolysis (I = 10 mA) for 2 h. After the completion of the reaction (monitored by TLC), the solvent was evaporated under reduced pressure. The crude product was purified by silica column chromatography using EtOAc/Hexanes as eluent to furnish the corresponding 3-benzyl-2-substituted isoindolin-1-ones.



#### 4. General procedure E for the synthesis of 11-benzylisoindolo[2,1-*a*]quinazolin-5(11H)-one

To an oven dried reaction tube was charged with 2-aminobenzamide **3** (0.22 mmol, 1equiv.), *o*-alkynylbenzaldehydes **4** (0.22 mmol, 1equiv.), PTSA (0.04 mmol, 0.2 equiv.), KOAc (0.33 mmol, 1.5 equiv), Ferrocene (20 mol%), TBAPF<sub>6</sub> (0.22 mmol, 1 equiv.) in ACN (8 mL) was electrolyzed under constant current  $I = 10$  mA for 12 h. After the solvent was evaporated under reduced pressure. The crude products was purified by silica column chromatography using EtOAc/Hexanes as an eluent to furnish the corresponding 11-benzylisoindolo[2,1-*a*]quinazolin-5(11H)-ones.

#### 5. General procedure for the scale up synthesis of isoindolin-1-one

To an oven dried beaker was charged with **1aa** (2.7 mmol, 1 equiv.), DIPEA (4.05 mmol, 1.5 equiv.) and TBAPF<sub>6</sub> (2.7 mmol, 1 equiv.) in ACN 40 mL was electrolyzed with Pt plate as both anode and cathode under constant current electrolysis with  $I = 20$  mA for 12 h. After the completion of reaction (monitored by TLC), the solvent was evaporated under reduced pressure, crude product was purified by silica column chromatography using 5% Ethylacetate in *n*-hexanes as solvent gradient to furnish the isoindolin-1-one **2aa** as white solid (0.604 g) in 75% yield.

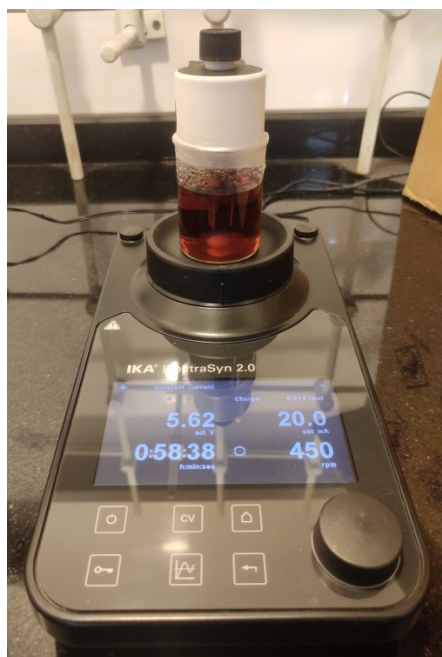

## 6. Optimization table for the synthesis of isoindole fused quinazolinones<sup>a,b</sup>

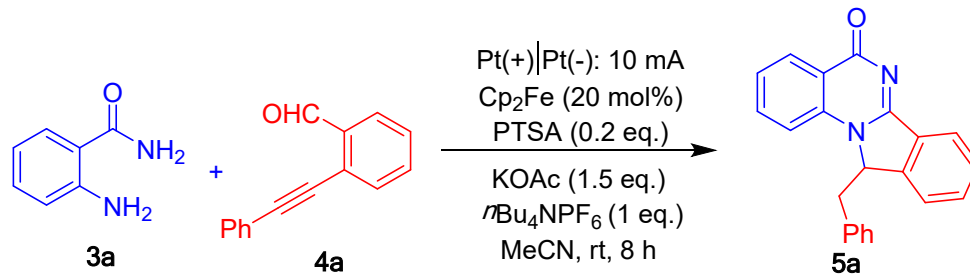

| S.No | Deviation from standard conditions             | Yield (%) |
|------|------------------------------------------------|-----------|
| 1    | None                                           | 58        |
| 2    | DIPEA instead of KOAc                          | 10        |
| 3    | K <sub>2</sub> CO <sub>3</sub> instead of KOAc | 0         |
| 4    | Without Ferrocene                              | 0         |
| 5    | C anode Pt cathode (C Pt)                      | 41        |
| 6    | C anode C cathode (C C)                        | 35        |

Reaction conditions: <sup>a</sup>All reactions were carried out with **3aa** (0.22 mmol), **4aa** (0.22 mmol), KOAc (0.33 mmol), Cp<sub>2</sub>Fe (20 mol%) TBAPF<sub>6</sub> (0.22 mmol), PTSA (0.4 mmol) ACN (8.0 mL), Pt(+)|Pt(-), I= 10 mA, rt, 12 h. <sup>b</sup>Yields were determined after the purification of the compound.

## 7. X-ray crystallographic studies of compound **5aj** (CCDC 2236020)

Single crystals of compound **5aj** for X-ray diffraction analysis were grown using mixture of DCM and Hexane (8:2) under slow evaporation method. X-ray diffraction data collection of compound **5aj** was recorded in Bruker single crystal KAPPA APEXII instrument.

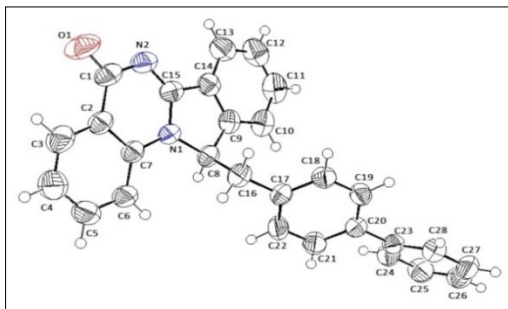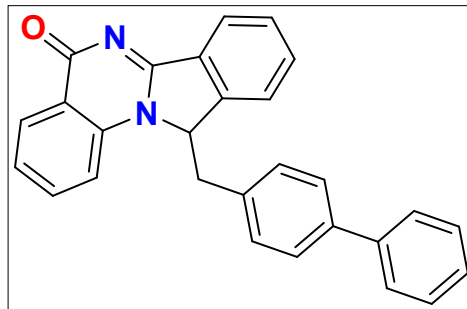

Table 1. Crystal data and structure refinement for **5aj**

|                                        |                                                  |                            |
|----------------------------------------|--------------------------------------------------|----------------------------|
| <b>Identification code</b>             | <b>5aj</b>                                       |                            |
| <b>Empirical formula</b>               | C <sub>28</sub> H <sub>20</sub> N <sub>2</sub> O |                            |
| <b>Formula weight</b>                  | 400.46                                           |                            |
| <b>Temperature</b>                     | 298(2) K                                         |                            |
| <b>Wavelength</b>                      | 0.71073 Å                                        |                            |
| <b>Crystal system</b>                  | Triclinic                                        |                            |
| <b>Space group</b>                     | P -1                                             |                            |
| <b>Unit cell dimensions</b>            | a = 7.6187(6) Å                                  | $\alpha = 98.304(3)^\circ$ |
|                                        | b = 12.5488(10) Å                                | $\beta = 106.817(3)^\circ$ |
|                                        | c = 13.1109(11) Å                                | $\gamma = 96.575(3)^\circ$ |
| <b>Volume</b>                          | 1171.01(17) Å <sup>3</sup>                       |                            |
| <b>Z, Calculated density</b>           | 2, 1.136 Mg/m <sup>3</sup>                       |                            |
| <b>Absorption coefficient</b>          | 0.069 mm <sup>-1</sup>                           |                            |
| <b>F(000)</b>                          | 420                                              |                            |
| <b>Crystal size</b>                    | 0.282 x 0.160 x 0.081 mm                         |                            |
| <b>Theta range for data collection</b> | 3.327 to 26.000 °                                |                            |

|                                         |                                             |
|-----------------------------------------|---------------------------------------------|
| <b>Limiting indices</b>                 | -9<=h<=9, -15<=k<=15, -16<=l<=16            |
| <b>Reflections collected / unique</b>   | 50982 / 4580 [R(int) = 0.0876]              |
| <b>Completeness to theta = 25.242</b>   | 99.6 %                                      |
| <b>Absorption correction</b>            | Semi-empirical from equivalents             |
| <b>Max. and min. transmission</b>       | 0.746 and 0.665                             |
| <b>Refinement method</b>                | Full-matrix least-squares on F <sup>2</sup> |
| <b>Data / restraints / parameters</b>   | 4580 / 0 / 281                              |
| <b>Goodness-of-fit on F2</b>            | 0.994                                       |
| <b>Final R indices [I&gt;2sigma(I)]</b> | R1 = 0.0517, wR2 = 0.1543                   |
| <b>R indices (all data)</b>             | R1 = 0.0764, wR2 = 0.1793                   |
| <b>Extinction coefficient</b>           | 0.023(6)                                    |
| <b>Largest diff. peak and hole</b>      | 0.184 and -0.175 e.Å <sup>-3</sup>          |

## 8. Intermediates isolation

### (Z)-3-benzylidene-2-phenylisoindolin-1-one **2aa'**<sup>4</sup>

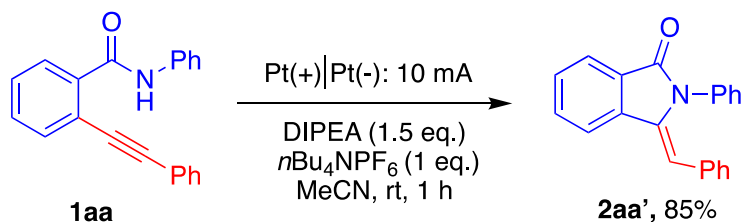

The title compound **2aa'** was prepared by following general procedure D and the reaction was stopped at 1 h, the solvent was evaporated under reduced pressure. The pure product was isolated using silica column chromatography. White solid, 85% yield (Solvent gradient: 3% ethylacetate in hexanes)

<sup>1</sup>H NMR (300 MHz, CDCl<sub>3</sub>): δ<sub>H</sub> 7.95 (d, *J* = 7.5 Hz, 1H), 7.86 (d, *J* = 7.8 Hz, 1H), 7.68 (t, *J* = 7.5 Hz, 1H), 7.55 (t, *J* = 7.5 Hz, 1H), 7.07 (s, 5H), 6.96-6.88 (m, 3H), 6.85-6.82 (m, 3H).

<sup>13</sup>C NMR (75 MHz, CDCl<sub>3</sub>): δ<sub>C</sub> 167.9, 138.6, 135.9, 134.3, 133.5, 132.4, 129.2, 129.1, 128.1, 127.8, 127.2, 126.7, 126.5, 123.8, 119.4, 107.6.

### 2-(2-(phenylethynyl)phenyl)quinazolin-4(3H)-one **G**<sup>5</sup>

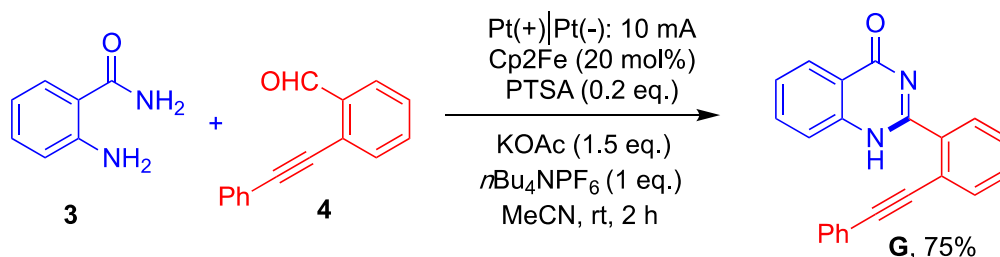

The reaction tube was charged with 2-aminobenzamide **3aa** (0.22 mmol, 1 equiv.), 2-(phenylethynyl)benzaldehyde **4aa** (0.22 mmol, 1 equiv.), PTSA (0.04 mmol, 0.2 equiv.), KOAc (0.33 mmol, 1.5 equiv.), ferrocene (20 mol%) and TBAPF<sub>6</sub> (0.22 mmol, 1 equiv.) in ACN (8 mL) was electrolyzed with Pt plate as both anode and cathode for 2 h. after that the solvent was evaporated and pure products were isolated by silica column chromatography using 25% ethylacetate in hexanes as solvent gradient afforded intermediate **G** as white solid in 75% yield.

**<sup>1</sup>H NMR (300 MHz, CDCl<sub>3</sub>):** δ<sub>H</sub> 10.85 (br s, 1H), 8.35-8.28 (m, 2H), 7.85-7.77 (m, 2H), 7.71-7.68 (m, 1H), 7.64-7.61 (m, 2H), 7.54-7.49 (m, 3H), 7.37 (t, *J* = 3.3 Hz, 3H).

**<sup>13</sup>C NMR (75 MHz, CDCl<sub>3</sub>):** δ<sub>C</sub> 161.7, 151.2, 149.3, 134.7, 133.8, 133.3, 131.7, 131.0, 130.2, 129.3, 129.1, 128.6, 128.0, 127.0, 126.5, 121.7, 121.2, 120.4, 97.0, 86.6.

### Intermediate trapping experiment by HRMS

To an oven dried reaction vial was charged with **1aa** (0.16 mmol, 1 equiv.), BHT (0.32 mmol, 2.0 equiv.) DIPEA (0.25 mmol, 1.5 equiv.) and TBAPF<sub>6</sub> (0.16 mmol, 1 equiv.). The reaction mixture was electrolyzed with Pt plate as both anode and cathode under constant current electrolysis (*I* = 10 mA) for 1 h and the crude reaction mixture was subjected to HRMS analysis and the results are shown below.

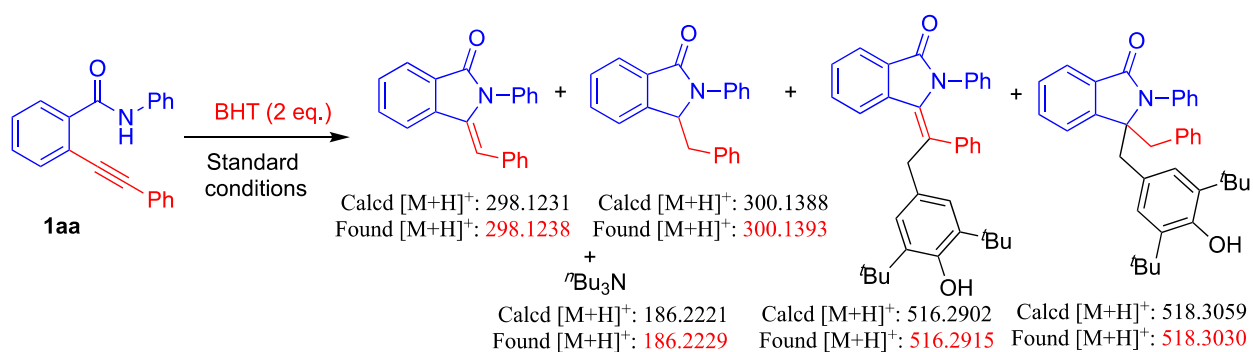

PS2

Waters Xevo G2 - XS QToF  
SAIF Madras

15-Jun-2023 13:23:24

15\_06\_2023\_PS2\_001 22 (0.428)

1: TOF MS ES+  
1.45e7

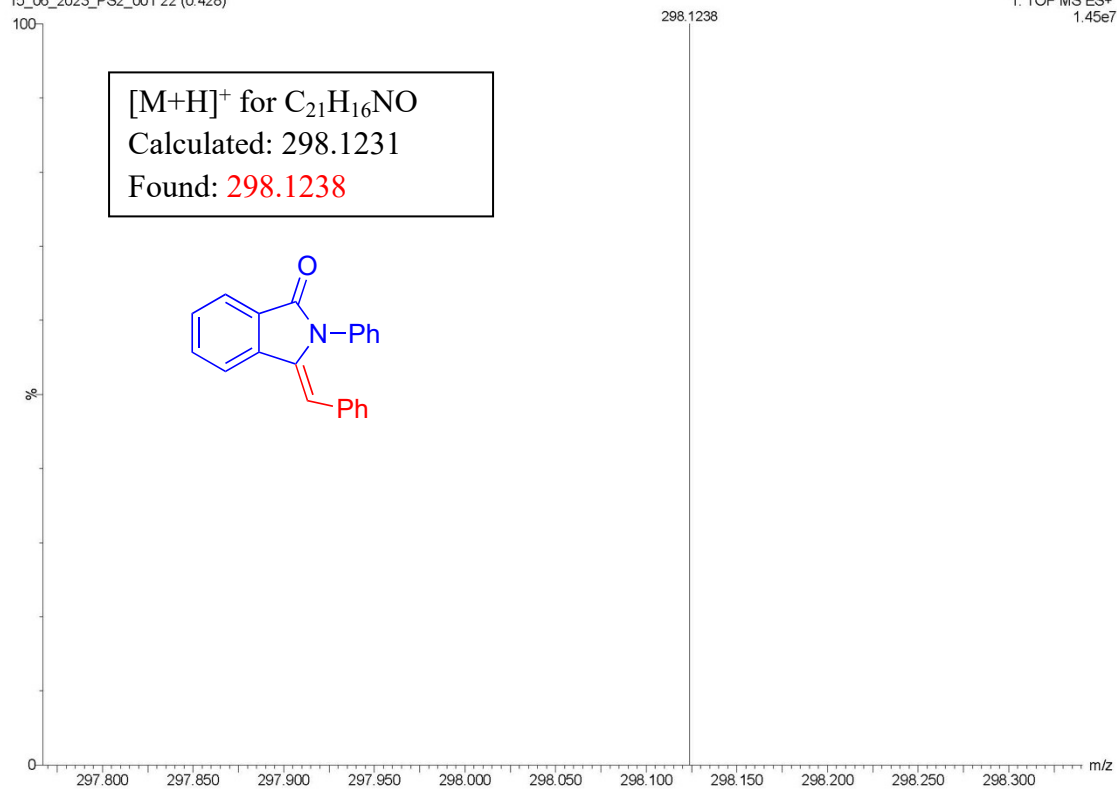

### HRMS Spectrum of compound 2aa'

PS2

Waters Xevo G2 - XS QTof  
SAIF Madras

15-Jun-2023 13:23:24

15\_06\_2023\_PS2\_001 22 (0.428)

1: TOF MS ES+  
2.51e7

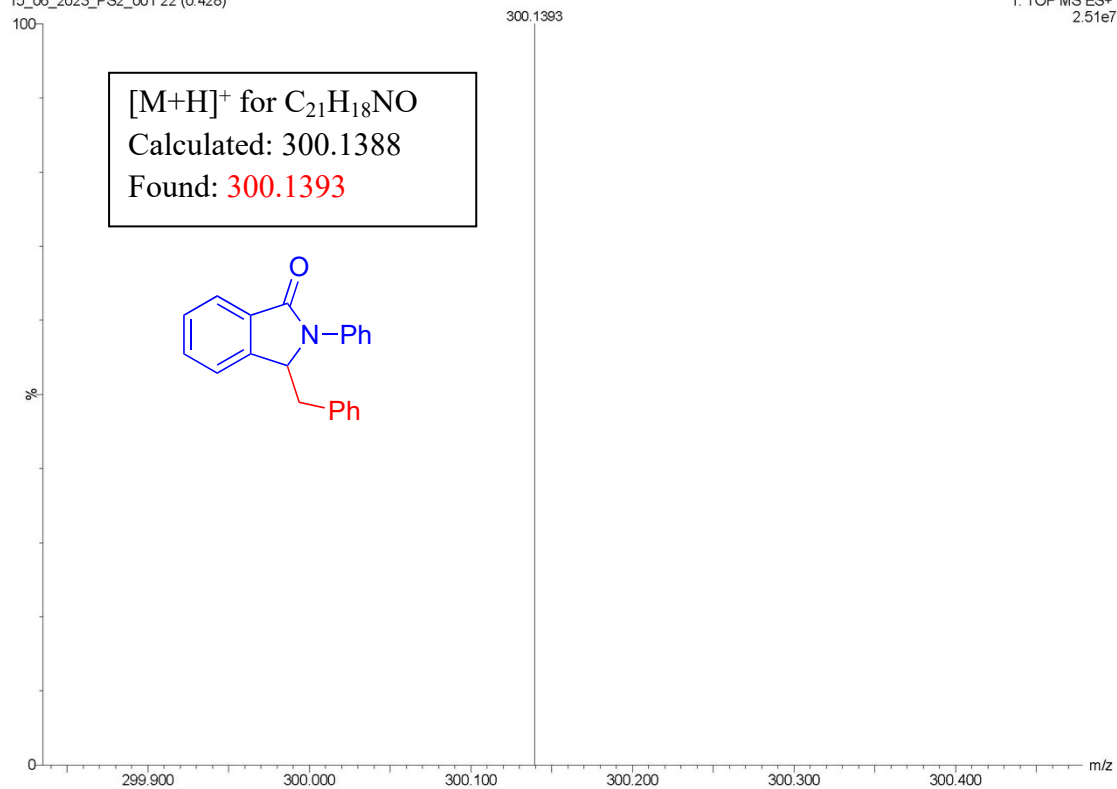

**HRMS Spectrum of compound 2aa**



PS2

Waters Xevo G2 - XS QToF  
SAIF Madras

15-Jun-2023 13:23:24

15\_06\_2023\_PS2\_001 24 (0.462)  
516.2915

1: TOF MS ES+  
126

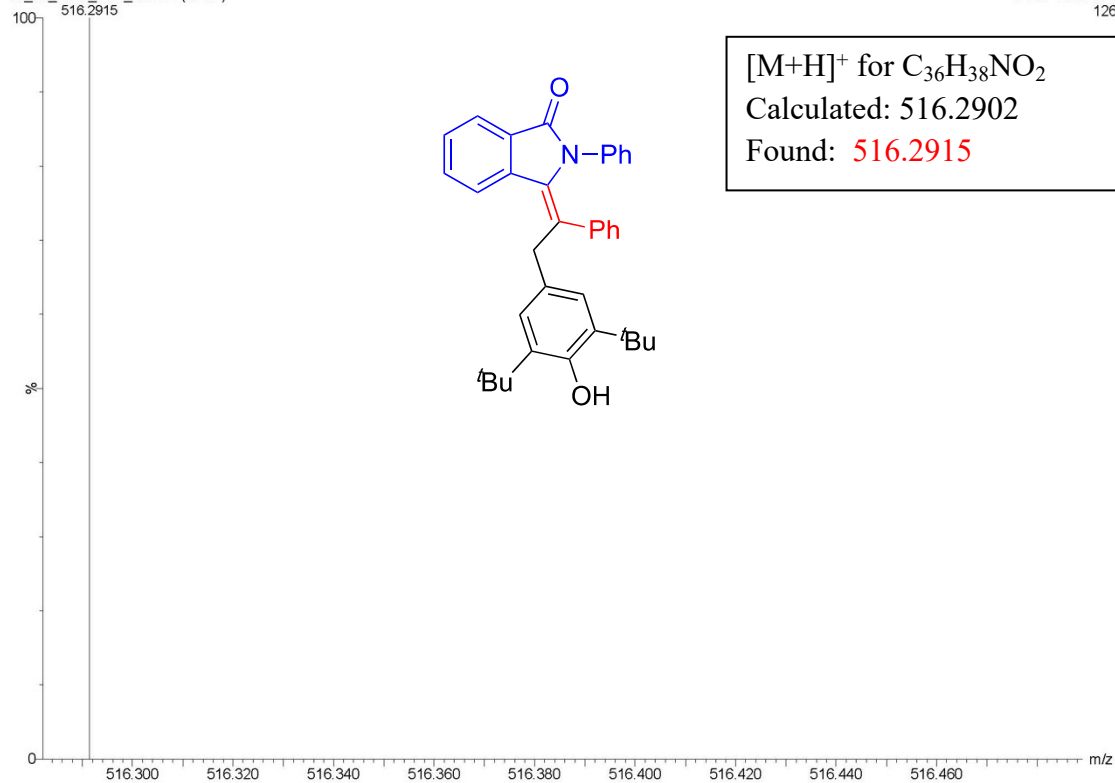

### HRMS Spectrum of intermediate C withy BHT adduct

PS2

Waters Xevo G2 - XS QToF  
SAIF Madras

15-Jun-2023 13:23:24

15\_06\_2023\_PS2\_001 22 (0.428)

1: TOF MS ES+  
1.72e3

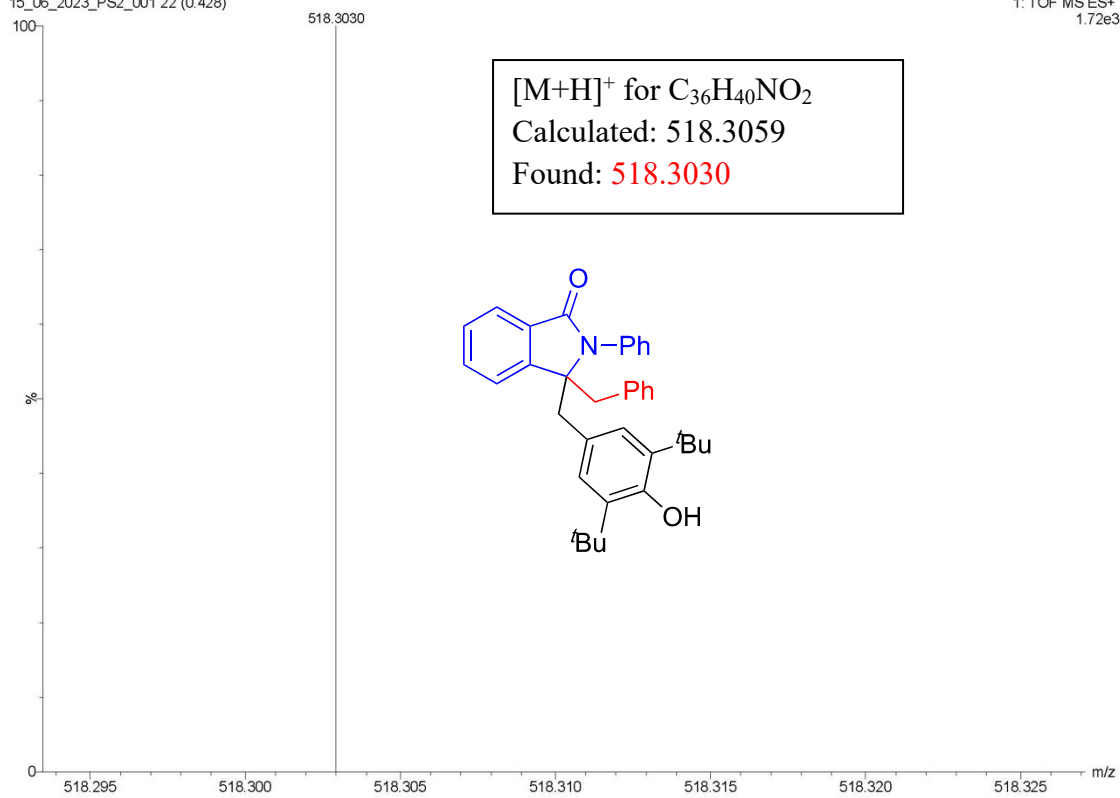

**HRMS Spectrum of intermediate E withy BHT adduct**

PS2

Waters Xevo G2 - XS QTof  
SAIF Madras

15-Jun-2023 13:23:24

15\_06\_2023\_PS2\_001 22 (0.428)

1: TOF MS ES+  
3.01e7

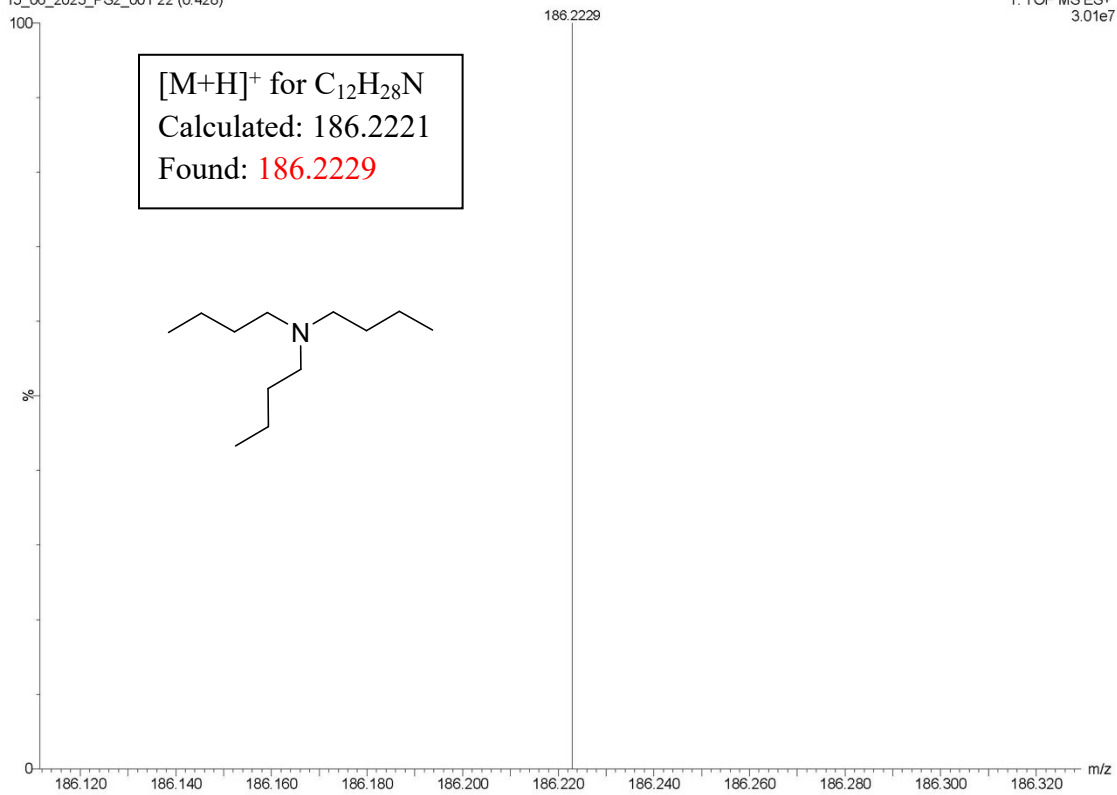

### HRMS Spectrum of intermediate K

## 9. CV experiments

Cyclic voltammetry experiments were performed using Metrohm Autolab model AUT51540 (PGSTAT 204) in a three-electrode setup at room temperature. Working, counter and reference electrodes were glassy carbon, Platinum foil and Ag|AgCl electrode. The red curve showed no oxidation and redox peaks. The CV of base DIPEA (blue curve) had two oxidation peaks (1.03 mV and 1.27 mV) and one reduction peak. The pink curve (base+**1a**) showed similar oxidation peak slightly lower potential (1.01 mV) to the base. Therefore, the CV indicates in the presence of base substrate **1a** oxidized by electric current.

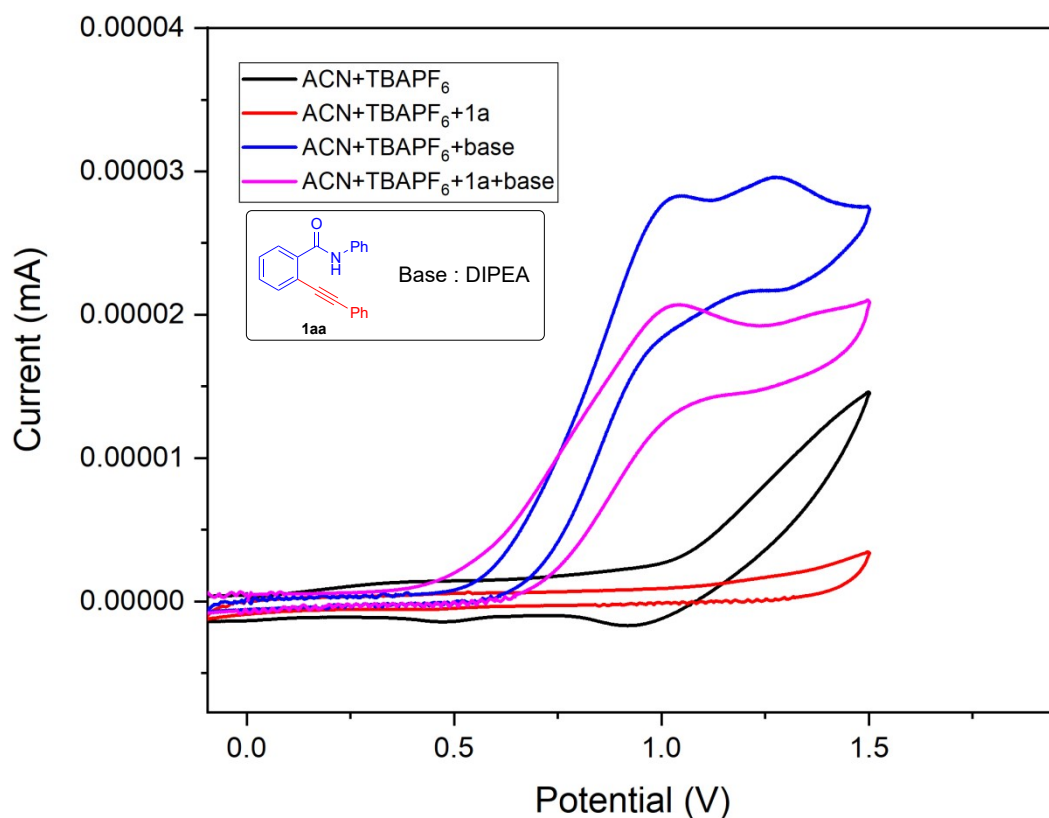

## 10. Spectral data

### 3-benzyl-2-phenylisoindolin-1-one **2aa**<sup>6</sup>

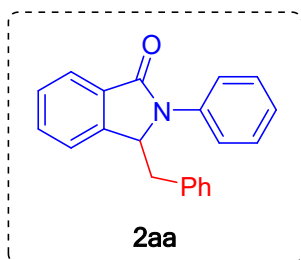

The title compound **2aa** (42 mg) was prepared by following general procedure D. Pure product was isolated using silica column chromatography. White solid, 83% yield (Solvent gradient: 5% ethylacetate in hexanes).

**<sup>1</sup>H NMR (300 MHz, CDCl<sub>3</sub>):**  $\delta_{\text{H}}$  7.86 (d,  $J$  = 6.6 Hz, 1H), 7.68 (d,  $J$  = 7.8 Hz, 2H), 7.52-7.47 (m, 4H), 7.29-7.24 (m, 1H), 7.19-7.15 (m, 3H), 7.12 (d,  $J$  = 6.6 Hz, 1H), 6.91-6.86 (m, 2H), 5.47 (dd,  $J$  = 4.5, 5.1 Hz, 1H), 3.40 (dd,  $J$  = 3.3, 3.6 Hz, 1H), 2.90 (dd,  $J$  = 8.1, 7.8 Hz, 1H).

**<sup>13</sup>C NMR (75 MHz, CDCl<sub>3</sub>):**  $\delta_{\text{C}}$  166.9, 144.4, 137.7, 135.7, 132.7, 131.4, 129.6, 129.16, 128.4, 128.2, 126.9, 125.3, 124.2, 123.4, 122.9, 61.5, 38.6.

### 3-benzyl-2-(p-tolyl)isoindolin-1-one **2ab**

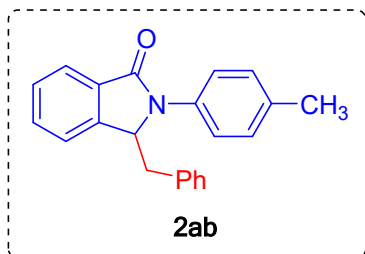

The title compound **2ab** (43 mg) was prepared by following general procedure D. Pure product was isolated using silica column chromatography. White solid, 81% yield (Solvent gradient: 5% ethylacetate in hexanes).

**<sup>1</sup>H NMR (300 MHz, CDCl<sub>3</sub>):**  $\delta_{\text{H}}$  7.84 (d,  $J$  = 3.9 Hz, 1H), 7.55-7.44 (m, 4H), 7.31-7.27 (m, 2H), 7.18 (d,  $J$  = 2.7 Hz, 3H), 7.05 (d,  $J$  = 7.2 Hz, 1H), 6.91 (d,  $J$  = 1.8 Hz, 2H), 5.42 (dd,  $J$  = 3.6, 3.3 Hz, 1H), 3.39 (dd,  $J$  = 3.3, 3.3 Hz, 1H), 2.85 (dd,  $J$  = 8.4, 8.1 Hz, 1H), 2.41 (s, 3H).

**<sup>13</sup>C NMR (75 MHz, CDCl<sub>3</sub>):**  $\delta_{\text{C}}$  166.9, 144.1, 135.5, 135.2, 134.7, 132.5, 131.3, 129.8, 129.6, 128.4, 128.2, 126.9, 124.0, 123.4, 122.9, 61.5, 38.3, 20.9.

**HRMS (ESI) m/z:** [M+H]<sup>+</sup> calculated for C<sub>22</sub>H<sub>20</sub>NO: 314.1544, Found: 314.1560.

### 3-benzyl-2-(4-methoxyphenyl)isoindolin-1-one **2ac**<sup>7</sup>

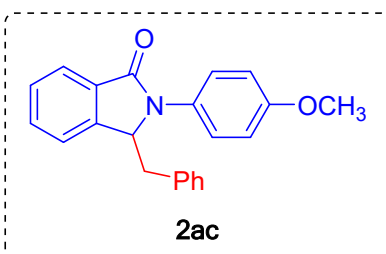

The title compound **2ac** (43 mg) was prepared by following general procedure D. Pure product was isolated using silica column chromatography. White solid, 78% yield (Solvent gradient: 5% ethylacetate in hexanes).

**<sup>1</sup>H NMR (300 MHz, CDCl<sub>3</sub>):**  $\delta_{\text{H}}$  7.86-7.83 (m, 1H), 7.54-7.44 (m, 4H), 7.27-7.15 (m, 3H), 7.06-7.01 (m, 3H), 6.92-6.85 (m, 2H), 5.36 (dd,  $J = 3.6, 2.7$  Hz, 1H), 3.86 (s, 3H), 3.37 (dd,  $J = 3.3, 3.3$  Hz, 1H), 2.83 (dd,  $J = 8.1, 8.1$  Hz, 1H).

**<sup>13</sup>C NMR (75 MHz, CDCl<sub>3</sub>):**  $\delta_{\text{C}}$  166.8, 157.8, 144.5, 135.9, 132.8, 131.2, 130.7, 129.6, 128.4, 128.2, 126.9, 125.3, 124.1, 122.9, 114.8, 62.0, 55.6, 38.7.

### 3-benzyl-2-(4-fluorophenyl)isoindolin-1-one **2ad**

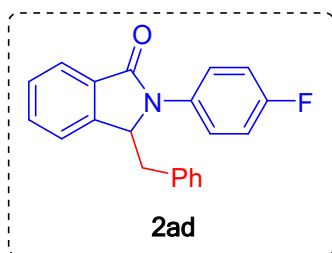

The title compound **2ad** (37 mg) was prepared by following general procedure D. Pure product was isolated using silica column chromatography. Pale yellow liquid, 69% yield (Solvent gradient: 5% ethylacetate in hexanes).

**<sup>1</sup>H NMR (300 MHz, CDCl<sub>3</sub>):**  $\delta_{\text{H}}$  7.84-7.81 (m, 1H), 7.59-7.55 (m, 2H), 7.48-7.44 (m, 2H), 7.18-7.04-6.85 (m, 6H), 6.84 (dd,  $J = 1.8, 3.3$  Hz, 2H), 5.39 (dd,  $J = 3.9, 3.9$  Hz, 1H), 3.34 (dd,  $J = 3.9, 3.9$  Hz, 1H), 2.87 (dd,  $J = 7.8, 7.8$  Hz, 1H).

**<sup>13</sup>C NMR (75 MHz, CDCl<sub>3</sub>):**  $\delta_{\text{C}}$  166.9, 160.2 (d,  $J = 244.1$  Hz), 144.0, 135.2, 133.3 (d,  $J = 2.2$  Hz), 132.1, 131.5, 129.5, 128.5, 128.2, 126.9, 125.2 (d,  $J = 8.1$  Hz), 124.1, 122.9, 115.9 (d,  $J = 22.4$  Hz), 61.6, 38.3.

**HRMS (ESI) m/z:** [M+H]<sup>+</sup> calculated for C<sub>21</sub>H<sub>17</sub>FNO: 318.1294, Found: 318.1296.

### 3-benzyl-2-(3-chlorophenyl)isoindolin-1-one **2ae**<sup>8</sup>

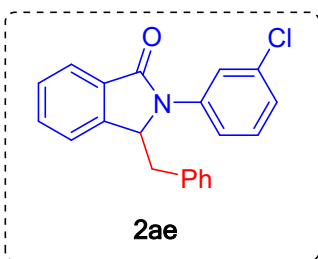

The title compound **2ae** (40 mg) was prepared by following general procedure D. Pure product was isolated using silica column chromatography. White solid, 71% yield (Solvent gradient: 5% ethylacetate in hexanes).

**<sup>1</sup>H NMR (300 MHz, CDCl<sub>3</sub>):**  $\delta_{\text{H}}$  7.82 (d,  $J = 7.2$  Hz, 1H), 7.70 (d,  $J = 1.8$  Hz, 1H), 7.58-7.36 (m, 4H), 7.25-7.10 (m, 5H), 6.83 (t,  $J = 1.5$  Hz, 2H), 5.42 (dd,  $J = 3.3, 3.3$  Hz, 1H), 3.36 (dd,  $J = 3.6, 3.3$  Hz, 1H), 2.92 (dd,  $J = 7.5, 7.5$  Hz, 1H).

**<sup>13</sup>C NMR (75 MHz, CDCl<sub>3</sub>):**  $\delta_{\text{C}}$  166.9, 143.9, 138.8, 135.0, 134.9, 132.0, 131.8, 130.0, 129.5, 128.5, 128.2, 127.0, 125.2, 124.2, 123.0, 122.9, 120.9, 61.1, 38.2.

### 3-benzyl-2-(4-chlorophenyl)isoindolin-1-one **2af**

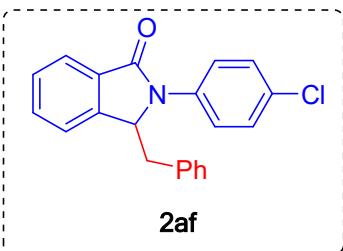

The title compound **2af** (42 mg) was prepared by following general procedure D. Pure product was isolated using silica column chromatography. Pale yellow liquid, 74% yield (Solvent gradient: 5% ethylacetate in hexanes).

**<sup>1</sup>H NMR (300 MHz, CDCl<sub>3</sub>):**  $\delta_{\text{H}}$  7.84 (d,  $J = 6.9$  Hz, 1H), 7.62 (d, 8.7 Hz, 2H), 7.54-7.44 (m, 4H), 7.17-7.12 (m, 4H), 6.84 (d,  $J = 3.9$  Hz, 2H), 5.44 (dd,  $J = 3.3, 3.6$  Hz, 1H), 3.37 (dd,  $J = 3.3, 3.3$  Hz, 1H), 2.93 (dd,  $J = 7.5, 7.5$  Hz, 1H).

**<sup>13</sup>C NMR (75 MHz, CDCl<sub>3</sub>):**  $\delta_{\text{C}}$  166.9, 144.2, 136.3, 135.3, 132.4, 131.7, 130.8, 129.6, 129.3, 128.6, 128.3, 127.0, 124.4, 124.3, 122.9, 61.4, 38.6.

**HRMS (ESI) m/z:** [M+H]<sup>+</sup> calculated for C<sub>21</sub>H<sub>17</sub>ClNO: 334.0998, Found: 334.0997.

### 3-benzyl-2-(4-bromophenyl)isoindolin-1-one **2ag**

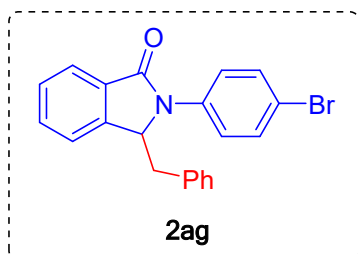

The title compound **2ag** (45 mg) was prepared by following general procedure D. Pure product was isolated using silica column chromatography. Pale yellow liquid, 71% yield (Solvent gradient: 5% ethylacetate in hexanes).

**<sup>1</sup>H NMR (300 MHz, CDCl<sub>3</sub>):**  $\delta_{\text{H}}$  7.83-7.80 (m, 1H), 7.63-7.42 (m, 6H), 7.15-7.10 (m, 4H), 6.83-6.80 (m, 2H), 5.42 (dd,  $J = 3.6, 3.6$  Hz, 1H), 3.35 (dd,  $J = 3.6, 3.6$  Hz, 1H), 2.91 (dd,  $J = 7.8, 7.5$  Hz, 1H).

**<sup>13</sup>C NMR (75 MHz, CDCl<sub>3</sub>):**  $\delta_{\text{C}}$  166.8, 143.9, 136.4, 134.9, 132.2, 132.1, 131.7, 129.5, 128.5, 128.2, 127.0, 124.5, 124.1, 122.9, 118.3, 61.1, 38.1.

**HRMS (ESI) m/z:**  $[M+H]^+$  calculated for C<sub>21</sub>H<sub>17</sub>BrNO: 378.0493, Found: 378.0480.

### 4-(1-benzyl-3-oxoisoindolin-2-yl)benzonitrile **2ah**

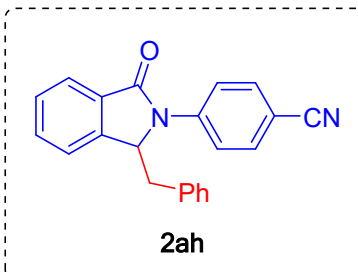

The title compound **2ah** (36 mg) was prepared by following general procedure D. Pure product was isolated using silica column chromatography. Pale yellow liquid, 66% yield (Solvent gradient: 5% ethylacetate in hexanes).

**<sup>1</sup>H NMR (300 MHz, CDCl<sub>3</sub>):**  $\delta_{\text{H}}$  7.87-7.82 (m, 3H), 7.75 (d,  $J = 8.7$  Hz, 2H), 7.59-7.46 (m, 2H), 7.27-7.13 (m, 4H), 6.77 (d,  $J = 6.6$  Hz, 2H), 5.53 (dd,  $J = 3.6, 3.6$  Hz, 1H), 3.38 (dd,  $J = 3.3, 3.3$  Hz, 1H), 3.02 (dd,  $J = 7.5, 7.5$  Hz, 1H).

**<sup>13</sup>C NMR (75 MHz, CDCl<sub>3</sub>):**  $\delta_{\text{C}}$  167.1, 143.8, 141.6, 134.4, 133.1, 132.3, 131.6, 129.4, 128.8, 128.3, 127.2, 124.4, 122.9, 122.1, 118.6, 107.9, 60.6, 38.1.

**HRMS (ESI) m/z:**  $[M+H]^+$  calculated for C<sub>22</sub>H<sub>17</sub>N<sub>2</sub>O: 325.1340, Found: 325.1349.



### 2-(4-acetylphenyl)-3-benzylisoindolin-1-one **2ai**

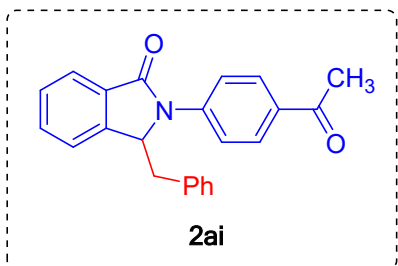

The title compound **2ai** (35 mg) was prepared by following general procedure D. Pure product was isolated using silica column chromatography. White solid, 61% yield (Solvent gradient: 5% ethylacetate in hexanes).

**<sup>1</sup>H NMR (300 MHz, CDCl<sub>3</sub>):**  $\delta_{\text{H}}$  8.10 (d,  $J = 9$  Hz, 2H), 7.86-7.83 (m, 3H), 7.56-7.45 (m, 2H), 7.19-7.11 (m, 4H), 6.81-6.79 (m, 2H), 5.55 (dd,  $J = 3.6, 3.6$  Hz, 1H), 3.41 (dd,  $J = 3.3, 3.3$  Hz, 1H), 3.00 (dd,  $J = 7.5, 7.5$  Hz, 1H), 2.64 (s, 3H).

**<sup>13</sup>C NMR (75 MHz, CDCl<sub>3</sub>):**  $\delta_{\text{C}}$  196.8, 167.1, 143.8, 141.8, 134.7, 133.5, 132.1, 132.0, 129.5, 128.7, 128.2, 127.1, 124.3, 122.9, 121.8, 60.8, 38.1, 26.3.

**HRMS (ESI)  $m/z$ :**  $[M+H]^+$  calculated for C<sub>23</sub>H<sub>20</sub>NO<sub>2</sub>: 342.1494, Found: 342.1490.

### 2,3-dibenzylisoindolin-1-one **2aj**<sup>6</sup>

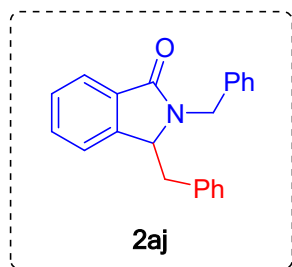

The title compound **2aj** (37 mg) was prepared by following general procedure D. Pure product was isolated using silica column chromatography. Colorless yellow liquid, 70% yield (Solvent gradient: 5% ethylacetate in hexanes).

**<sup>1</sup>H NMR (300 MHz, CDCl<sub>3</sub>):**  $\delta_{\text{H}}$  7.85 (d,  $J = 6.0$  Hz, 1H), 7.40-7.25 (m, 10 H), 7.04-6.96 (m, 1H), 6.89 (d,  $J = 6.0$  Hz, 1H), 5.46 (d,  $J = 15$  Hz, 1H), 4.61 (d,  $J = 9.6$  Hz, 1H), 4.24 (d,  $J = 14.7$  Hz, 1H), 3.40 (t,  $J = 12.3$  Hz, 1H), 2.85 (dd,  $J = 7.8, 7.5$  Hz, 1H).

**<sup>13</sup>C NMR (75 MHz, CDCl<sub>3</sub>):**  $\delta_{\text{C}}$  168.4, 145.4, 137.5, 136.4, 132.4, 131.0, 129.5, 128.8, 128.5, 128.2, 128.1, 127.6, 127.0, 123.9, 122.9, 59.9, 44.6, 38.8.

### 3-benzyl-2-(4-decylphenyl)isoindolin-1-one **2ak**

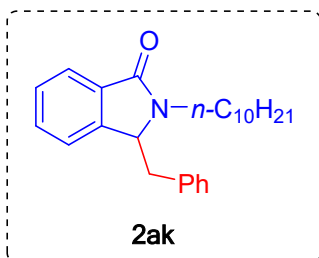

The title compound **2ak** (48 mg) was prepared by following general procedure D. Pure product was isolated using silica column chromatography. Yellow liquid, 78% yield (Solvent gradient: 5% ethylacetate in hexanes).

**<sup>1</sup>H NMR (300 MHz, CDCl<sub>3</sub>):**  $\delta_{\text{H}}$  7.76-7.74 (m, 1H), 7.38-7.35 (m, 2H), 7.25-7.21 (m, 3H), 7.08-7.06 (m, 2H), 6.93-6.90 (m, 1H), 4.77 (dd,  $J = 4.8, 4.8$  Hz, 1H), 4.08-3.98 (m, 1H), 3.36 (dd,  $J = 4.8, 4.8$  Hz, 1H), 3.23-3.14 (m, 1H), 2.83 (dd,  $J = 7.8, 7.8$  Hz, 1H), 1.62 (t,  $J = 8.1$  Hz, 2H), 1.30-1.26 (m, 14H), 0.87 (t,  $J = 6.3$  Hz, 3H).

**<sup>13</sup>C NMR (75 MHz, CDCl<sub>3</sub>):**  $\delta_{\text{C}}$  168.1, 144.8, 136.1, 132.5, 130.6, 129.4, 128.4, 128.0, 126.9, 123.5, 122.7, 60.0, 40.3, 38.5, 31.8, 29.4, 29.3, 29.2, 28.3, 26.9, 22.5, 13.9.

**HRMS (ESI) m/z:** [M+H]<sup>+</sup> calculated for C<sub>25</sub>H<sub>34</sub>NO: 364.2640, Found: 364.2642.

### 3-benzyl-2-cyclopentylisoindolin-1-one **2al**

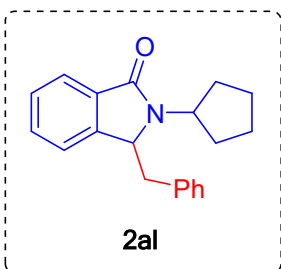

The title compound **2al** (37 mg) was prepared by following general procedure D. Pure product was isolated using silica column chromatography. Colorless liquid, 76% yield (Solvent gradient: 5% ethylacetate in hexanes).

**<sup>1</sup>H NMR (300 MHz, CDCl<sub>3</sub>):**  $\delta_{\text{H}}$  7.65 (d,  $J = 7.2$  Hz, 1H), 7.29-7.17 (m, 5H), 7.02 (d,  $J = 7.5$  Hz, 2H), 6.62 (d,  $J = 7.2$  Hz, 1H), 4.67 (dd,  $J = 4.2, 4.2$  Hz, 1H), 4.06 (dd,  $J = 8.4, 8.7$  Hz, 1H), 3.43 (dd,  $J = 4.2, 3.9$  Hz, 1H), 2.63 (dd,  $J = 9.0, 8.7$  Hz, 1H), 1.97-1.86 (m, 6H), 1.55 (d,  $J = 5.4$  Hz, 2H).

**<sup>13</sup>C NMR (75 MHz, CDCl<sub>3</sub>):**  $\delta_{\text{C}}$  168.3, 145.3, 136.7, 133.5, 130.4, 129.6, 128.5, 128.0, 127.0, 123.3, 122.8, 62.2, 56.1, 40.4, 30.3, 29.9, 24.6.

**HRMS (ESI) m/z:** [M+H]<sup>+</sup> calculated for C<sub>20</sub>H<sub>22</sub>NO: 292.1701, Found: 292.1700.

### 3-benzyl-2-cyclohexylisoindolin-1-one **2am**<sup>6</sup>

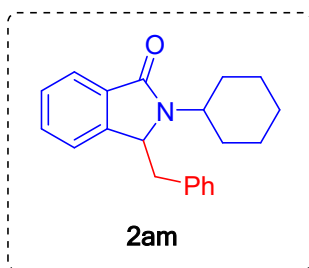

The title compound **2am** (40 mg) was prepared by following general procedure D. Pure product was isolated using silica column chromatography. Colorless liquid, 78% yield (Solvent gradient: 5% ethylacetate in hexanes).

**<sup>1</sup>H NMR (300 MHz, CDCl<sub>3</sub>):**  $\delta_{\text{H}}$  7.76 (d,  $J = 7.2$  Hz, 1H), 7.38-7.26 (m, 5H), 7.15 (d,  $J = 7.5$  Hz, 2H), 6.59 (d,  $J = 7.5$  Hz, 1H), 4.78 (dd,  $J = 4.5, 4.5$  Hz, 1H), 3.77 (d,  $J = 3.3$  Hz, 1H), 3.58 (dd,  $J = 4.5, 4.5$  Hz, 1H), 2.64 (dd,  $J = 9.3, 9.0$  Hz, 1H), 2.25-2.17 (m, 1H), 1.98-1.84 (m, 3H), 1.71 (d,  $J = 11.1$  Hz, 2H), 1.42-1.26 (m, 4H).

**<sup>13</sup>C NMR (75 MHz, CDCl<sub>3</sub>):**  $\delta_{\text{C}}$  168.3, 145.1, 136.8, 132.9, 130.4, 129.4, 128.5, 127.9, 126.9, 123.2, 122.8, 61.0, 54.3, 40.6, 31.3, 30.8, 26.3, 26.1, 25.5.

### 3-benzyl-2-methylisoindolin-1-one **2ba**<sup>6</sup>

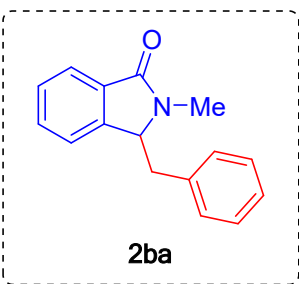

The title compound **2ba** (36 mg) was prepared by following general procedure D. Pure product was isolated using silica column chromatography. Colorless liquid, 90% yield (Solvent gradient: 15% ethylacetate in hexanes).

**<sup>1</sup>H NMR (300 MHz, CDCl<sub>3</sub>):**  $\delta_{\text{H}}$  7.78-7.76 (m, 1H), 7.41-7.38 (m, 2H), 7.27-7.22 (m, 3H), 7.09-7.06 (m, 2H), 7.01-6.97 (m, 1H), 4.66 (t,  $J = 5.4$  Hz, 1H), 3.35 (dd,  $J = 4.2, 4.2$  Hz, 1H), 3.13 (s, 3H), 2.93 (dd,  $J = 7.5, 6.9$  Hz, 1H).

**<sup>13</sup>C NMR (75 MHz, CDCl<sub>3</sub>):**  $\delta_{\text{C}}$  168.3, 145.0, 136.3, 132.7, 130.7, 129.4, 128.5, 128.1, 127.0, 123.5, 122.6, 62.8, 38.9, 27.9.

### 2-methyl-3-(4-methylbenzyl)isoindolin-1-one **2bb**<sup>9</sup>

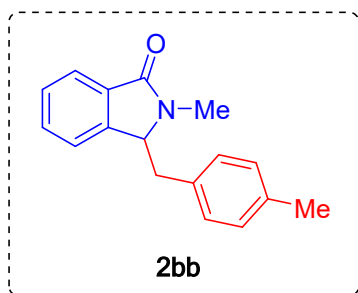

The title compound **2bb** (38 mg) was prepared by following general procedure D. Pure product was isolated using silica column chromatography. Pale yellow semisolid, 89% yield (Solvent gradient: 15% ethylacetate in hexanes).

**<sup>1</sup>H NMR (300 MHz, CDCl<sub>3</sub>):**  $\delta_{\text{H}}$  7.76-7.73 (m, 1H), 7.3 (t,  $J = 3.6$  Hz, 2H), 7.06-6.93 (m, 5H), 4.62 (dd,  $J = 4.8, 5.1$  Hz, 1H), 3.30 (dd,  $J = 4.8, 4.8$  Hz, 1H), 3.11 (s, 3H), 2.86 (dd,  $J = 7.5, 7.5$  Hz, 1H), 2.30 (s, 3H).

**<sup>13</sup>C NMR (75 MHz, CDCl<sub>3</sub>):**  $\delta_{\text{C}}$  168.4, 144.9, 136.5, 132.8, 132.4, 130.7, 129.2, 129.1, 128.0, 123.4, 122.6, 62.8, 38.1, 27.9, 20.9.

### 3-(4-(tert-butyl)benzyl)-2-methylisoindolin-1-one **2bc**

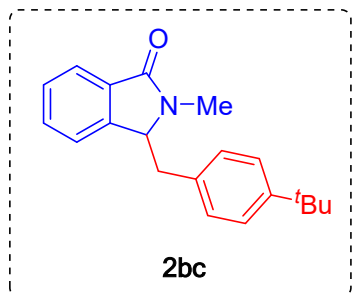

The title compound **2bc** (43 mg) was prepared by following general procedure D. Pure product was isolated using silica column chromatography. Pale yellow liquid, 86% yield (Solvent gradient: 15% ethylacetate in hexanes).

**<sup>1</sup>H NMR (300 MHz, CDCl<sub>3</sub>):**  $\delta_{\text{H}}$  7.67 (d,  $J = 6.3$  Hz, 1H), 7.31-7.28 (m, 2H), 7.20-7.12 (m, 2H), 6.89 (d,  $J = 8.4$  Hz, 3H), 4.54 (s, 1H), 3.23 (dd,  $J = 8.1, 5.4$  Hz, 1H), 3.05-2.98 (m, 3H), 2.79 (dd,  $J = 10.2, 7.5$  Hz, 1H), 1.22-1.13 (m, 9H).

**<sup>13</sup>C NMR (75 MHz, CDCl<sub>3</sub>):**  $\delta_{\text{C}}$  168.5, 149.9, 144.9, 132.8, 132.3, 130.8, 129.1, 128.1, 125.3, 123.4, 122.7, 62.7, 38.0, 34.4, 31.3, 28.0.

**HRMS (ESI) m/z:**  $[\text{M}+\text{H}]^+$  calculated for C<sub>20</sub>H<sub>24</sub>NO: 294.1857, Found: 294.1860.

### 3-(4-methoxybenzyl)-2-methylisoindolin-1-one **2bd**

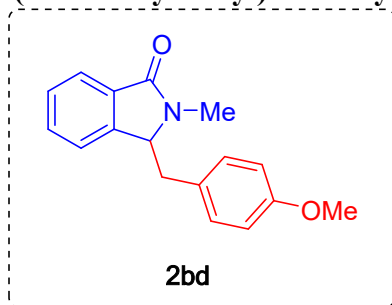

The title compound **2bd** (41 mg) was prepared by following general procedure D. Pure product was isolated using silica column chromatography. Pale yellow liquid, 90% yield (Solvent gradient: 15% ethylacetate in hexanes).

**<sup>1</sup>H NMR (300 MHz, CDCl<sub>3</sub>):**  $\delta_{\text{H}}$  7.76-7.73 (m, 1H), 7.39 (t,  $J = 3.3$  Hz, 2H), 7.01-6.93 (m, 3H), 6.76 (d,  $J = 8.4$  Hz, 2H), 4.60 (dd,  $J = 4.8, 5.1$  Hz, 1H), 3.75 (s, 3H), 3.30 (dd,  $J = 4.8, 4.5$  Hz, 1H), 3.13 (s, 3H), 2.84 (dd,  $J = 7.5, 7.5$  Hz, 1H).

**<sup>13</sup>C NMR (75 MHz, CDCl<sub>3</sub>):**  $\delta_{\text{C}}$  168.5, 158.5, 144.7, 132.3, 130.8, 130.4, 128.1, 127.7, 123.3, 122.7, 113.8, 62.8, 55.1, 37.5, 28.0.

### 2-methyl-3-(4-propylbenzyl)isoindolin-1-one **2be**

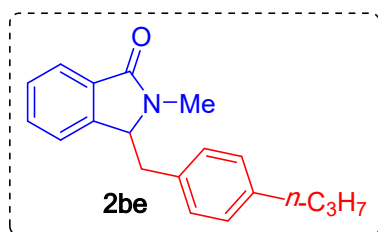

The title compound **2be** (39 mg) was prepared by following general procedure D. Pure product was isolated using silica column chromatography. Pale yellow liquid, 82% yield (Solvent gradient: 15% ethylacetate in hexanes).

**<sup>1</sup>H NMR (300 MHz, CDCl<sub>3</sub>):**  $\delta_{\text{H}}$  7.76 (t,  $J = 4.5$  Hz, 1H), 7.40-7.37 (m, 2H), 7.06 (d,  $J = 7.8$  Hz, 2H), 6.98 (d,  $J = 7.8$  Hz, 3H), 4.63 (dd,  $J = 5.4, 5.1$  Hz, 1H), 3.33 (dd,  $J = 4.8, 4.8$  Hz, 1H), 3.13 (s, 3H), 2.85 (dd,  $J = 7.8, 8.1$  Hz, 1H), 2.54 (t,  $J = 7.8$  Hz, 2H), 1.67-1.55 (m, 2H), 0.94-0.89 (m, 3H).

**<sup>13</sup>C NMR (75 MHz, CDCl<sub>3</sub>):**  $\delta_{\text{C}}$  168.4, 144.8, 141.4, 133.1, 132.3, 130.8, 129.3, 128.5, 128.1, 123.4, 122.7, 62.8, 38.2, 37.5, 28.0, 24.4, 13.7.

**HRMS (ESI) m/z:**  $[M+H]^+$  calculated for C<sub>19</sub>H<sub>22</sub>NO: 280.1701, Found: 280.1705.

### 3-(4-butylbenzyl)-2-methylisoindolin-1-one **2bf**

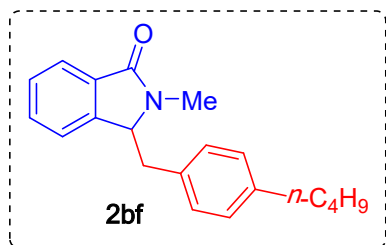

The title compound **2bf** (42 mg) was prepared by following general procedure D. Pure product was isolated using silica column chromatography. Pale yellow liquid, 84% yield (Solvent gradient: 15% ethylacetate in hexanes).

**<sup>1</sup>H NMR (300 MHz, CDCl<sub>3</sub>):**  $\delta_{\text{H}}$  7.77-7.75 (m, 1H), 7.40-7.38 (m, 2H), 7.08-6.96 (m, 5H), 4.63 (t,  $J = 6.6$  Hz, 1H), 3.33 (dd,  $J = 4.8, 4.8$  Hz, 1H), 3.13 (s, 3H), 2.85 (dd,  $J = 7.8, 7.8$  Hz, 1H), 2.57 (t,  $J = 7.5$  Hz, 2H), 1.59-1.52 (m, 2H), 1.37-1.25 (m, 2H), 0.91 (t,  $J = 7.5$  Hz, 3H)

**<sup>13</sup>C NMR (75 MHz, CDCl<sub>3</sub>):**  $\delta_{\text{C}}$  168.5, 144.8, 141.6, 133.0, 132.3, 130.8, 129.3, 128.5, 128.1, 123.4, 122.7, 62.8, 38.2, 35.2, 33.5, 28.0, 22.3, 13.9.

**HRMS (ESI) m/z:** [M+H]<sup>+</sup> calculated for C<sub>20</sub>H<sub>24</sub>NO: 294.1857, Found: 294.1859.

### 2-methyl-3-(4-pentylbenzyl)isoindolin-1-one **2bg**

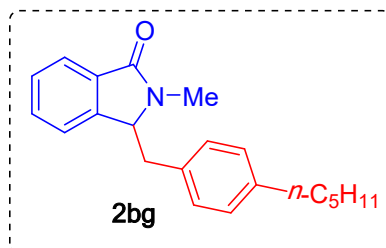

The title compound **2bg** (44 mg) was prepared by following general procedure D. Pure product was isolated using silica column chromatography. Pale yellow liquid, 84% yield (Solvent gradient: 15% ethylacetate in hexanes).

**<sup>1</sup>H NMR (300 MHz, CDCl<sub>3</sub>):**  $\delta_{\text{H}}$  7.79-7.76 (m, 1H), 7.42-7.38 (m, 2H), 7.11-7.06 (m, 2H), 7.01-6.96 (m, 3H), 4.64 (dd,  $J = 5.1, 4.8$  Hz, 1H), 3.32 (dd,  $J = 4.8, 4.8$  Hz, 1H), 3.13 (s, 3H), 2.88 (dd,  $J = 7.5, 7.5$  Hz, 1H), 2.57 (t, 7.2 Hz, 2H), 1.63-1.58 (m, 2H), 1.36-1.28 (m, 4H), 0.90 (t,  $J = 6$  Hz, 3H).

**<sup>13</sup>C NMR (75 MHz, CDCl<sub>3</sub>):**  $\delta_{\text{C}}$  168.3, 145.2, 141.8, 133.4, 132.7, 130.7, 129.3, 128.5, 128.0, 123.5, 122.7, 62.9, 38.6, 35.5, 31.4, 30.8, 27.9, 22.4, 13.7.

**HRMS (ESI) m/z:** [M+H]<sup>+</sup> calculated for C<sub>21</sub>H<sub>26</sub>NO: 308.2014, Found: 308.2013.

### 3-(3-fluorobenzyl)-2-methylisoindolin-1-one **2bh**

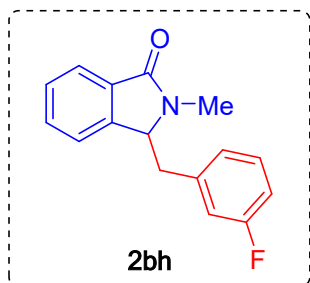

The title compound **2bh** (32 mg) was prepared by following general procedure D. Pure product was isolated using silica column chromatography. Pale yellow liquid, 76% yield (Solvent gradient: 15% ethylacetate in hexanes).

**<sup>1</sup>H NMR (400 MHz, CDCl<sub>3</sub>):**  $\delta_{\text{H}}$  7.70-7.67 (m, 1H), 7.36-7.32 (m, 2H), 7.19-7.10 (m, 1H), 6.96-6.93 (m, 1H), 6.86-6.81 (m, 1H), 6.76 (d,  $J = 7.6$  Hz, 1H), 6.70-6.66 (m, 1H), 4.58 (dd,  $J = 5.2, 4.8$  Hz, 1H), 3.27 (dd,  $J = 4.8, 4.8$  Hz, 1H), 3.06 (s, 3H), 2.86 (dd,  $J = 7.3, 7.4$  Hz, 1H).

**<sup>13</sup>C NMR (101 MHz, CDCl<sub>3</sub>):**  $\delta_{\text{C}}$  168.5, 162.6 (d,  $J = 247.2$  Hz), 144.3, 138.3 (d,  $J = 7.3$  Hz), 132.2, 131.0, 129.9 (d,  $J = 8.3$  Hz), 128.3, 125.1 (d,  $J = 2.3$  Hz), 123.5, 122.5, 116.3 (d,  $J = 21.4$  Hz), 114.0 (d,  $J = 21.0$  Hz), 113.9, 62.4, 38.1, 28.0.

**HRMS (ESI) m/z:** [M+H]<sup>+</sup> calculated for C<sub>16</sub>H<sub>14</sub>FNO: 256.1137, Found: 256.1132.

### 3-(3-chlorobenzyl)-2-methylisoindolin-1-one **2bi**

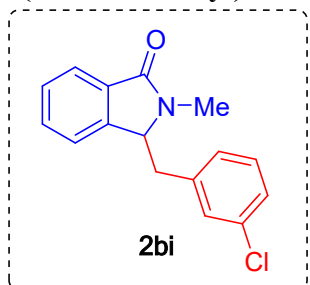

The title compound **2bi** (37 mg) was prepared by following general procedure D. Pure product was isolated using silica column chromatography. Pale yellow liquid, 80% yield (Solvent gradient: 15% ethylacetate in hexanes).

**<sup>1</sup>H NMR (400 MHz, CDCl<sub>3</sub>):**  $\delta_{\text{H}}$  7.78-7.76 (m, 1H), 7.44-7.41 (m, 2H), 7.22-7.15 (m, 2H), 7.06 (d,  $J = 2$  Hz, 1H), 7.02-7.00 (m, 1H), 6.94-6.91 (m, 1H), 4.65 (dd,  $J = 5.2, 4.8$  Hz, 1H), 3.33 (dd,  $J = 4.8, 4.8$  Hz, 1H), 3.14 (s, 3H), 2.91 (dd,  $J = 7.6, 7.6$  Hz, 1H).

**<sup>13</sup>C NMR (101 MHz, CDCl<sub>3</sub>):**  $\delta_{\text{C}}$  168.4, 144.3, 137.9, 134.3, 132.3, 131.0, 129.7, 129.5, 128.4, 127.6, 127.3, 123.6, 122.6, 62.4, 38.1, 28.1.

**HRMS (ESI) m/z:** [M]<sup>+</sup> calculated for C<sub>16</sub>H<sub>13</sub>ClNO: 271.0763, Found: 271.0736

#### 4-((2-methyl-3-oxoisindolin-1-yl)methyl)benzonitrile **2bj**

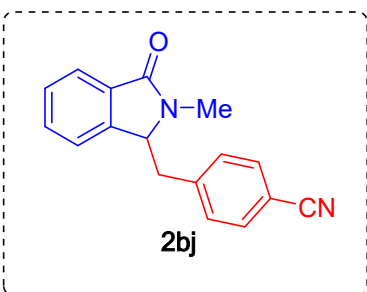

The title compound **2bj** (32 mg) was prepared by following general procedure D. Pure product was isolated using silica column chromatography. Yellow oily liquid, 73% yield (Solvent gradient: 15% ethylacetate in hexanes).

$^1\text{H NMR}$  (300 MHz,  $\text{CDCl}_3$ ):  $\delta_{\text{H}}$  7.75-7.73 (m, 1H), 7.50-7.40 (m, 4H), 7.11-7.07 (m, 3H), 4.72-4.68 (m, 1H), 3.38 (dd,  $J = 4.2, 4.2$  Hz, 1H), 3.15 (s, 3H), 3.12-3.07 (m, 1H).

$^{13}\text{C NMR}$  (75 MHz,  $\text{CDCl}_3$ ):  $\delta_{\text{C}}$  168.3, 143.8, 141.1, 132.4, 132.0, 131.1, 130.1, 128.5, 123.7, 122.3, 118.3, 111.1, 61.9, 38.1, 27.9.

HRMS (ESI)  $m/z$ :  $[\text{M}+\text{H}]^+$  calculated for  $\text{C}_{17}\text{H}_{15}\text{N}_2\text{O}$ : 263.1184, Found: 263.1195.

#### 3-(4-benzoylbenzyl)-2-methylisindolin-1-one **2bk**

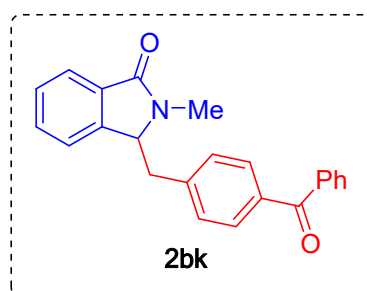

The title compound **2bk** (41 mg) was prepared by following general procedure D. Pure product was isolated using silica column chromatography. Pale yellow liquid, 71% yield (Solvent gradient: 15% ethylacetate in hexanes).

$^1\text{H NMR}$  (300 MHz,  $\text{CDCl}_3$ ):  $\delta_{\text{H}}$  7.79-7.69 (m, 5H), 7.59-7.57 (m, 1H), 7.51-7.42 (m, 4H), 7.18 (d,  $J = 8.1$  Hz, 2H), 7.10-7.07 (m, 1H), 4.74 (dd,  $J = 5.1, 4.8$  Hz, 1H), 3.45 (dd,  $J = 4.8, 4.8$  Hz, 1H), 3.18 (s, 3H), 3.10 (dd,  $J = 6.0, 2.4$  Hz, 1H).

$^{13}\text{C NMR}$  (75 MHz,  $\text{CDCl}_3$ ):  $\delta_{\text{C}}$  196.1, 168.4, 144.4, 140.8, 137.7, 136.4, 132.4, 132.3, 131.1, 130.3, 129.9, 129.4, 128.4, 128.3, 123.7, 122.5, 62.4, 38.4, 28.1.

HRMS (ESI)  $m/z$ :  $[\text{M}+\text{H}]^+$  calculated for  $\text{C}_{23}\text{H}_{20}\text{NO}_2$ : 342.1494, Found: 342.1493.



### 3-([1,1'-biphenyl]-4-ylmethyl)-2-methylisoindolin-1-one **2bl**

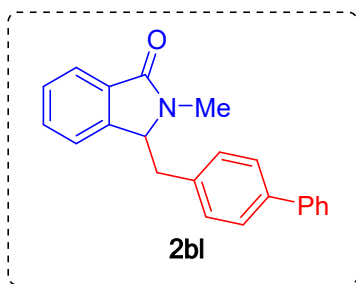

The title compound **2bl** (43 mg) was prepared by following general procedure D. Pure product was isolated using silica column chromatography. White solid, 82% yield (Solvent gradient: 15% ethylacetate in hexanes).

**<sup>1</sup>H NMR (300 MHz, CDCl<sub>3</sub>):**  $\delta_{\text{H}}$  7.79 (d,  $J = 4.8$  Hz, 1H), 7.58 (d,  $J = 7.5$  Hz, 2H), 7.51-7.34 (m, 7H), 7.15 (d,  $J = 7.5$  Hz, 2H), 7.07 (d,  $J = 6.9$  Hz, 1H), 4.70 (t,  $J = 5.1$  Hz, 1H), 3.41 (dd,  $J = 4.8, 4.8$  Hz, 1H), 3.18 (s, 3H), 2.97 (dd,  $J = 7.5, 7.5$  Hz, 1H).

**<sup>13</sup>C NMR (75 MHz, CDCl<sub>3</sub>):**  $\delta_{\text{C}}$  168.3, 144.7, 140.5, 139.8, 134.9, 132.3, 130.8, 129.7, 128.6, 128.1, 127.2, 127.0, 126.8, 123.4, 122.6, 62.6, 38.1, 27.9.

**HRMS (ESI) m/z:**  $[\text{M}+\text{H}]^+$  calculated for C<sub>22</sub>H<sub>20</sub>NO: 314.1544, Found: 314.1547.

### 2-methyl-3-(naphthalen-1-ylmethyl)isoindolin-1-one **2bm**

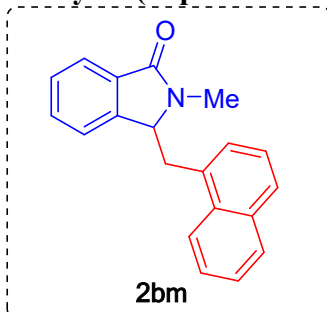

The title compound **2bm** (35 mg) was prepared by following general procedure D. Pure product was isolated using silica column chromatography. Yellow liquid, 71% yield (Solvent gradient: 15% ethylacetate in hexanes).

**<sup>1</sup>H NMR (300 MHz, CDCl<sub>3</sub>):**  $\delta_{\text{H}}$  8.05 (d,  $J = 7.5$  Hz, 1H), 7.93 (t,  $J = 6.9$  Hz, 1H), 7.87-7.84 (m, 2H), 7.59-7.52 (m, 2H), 7.48-7.38 (m, 2H), 7.29 (t,  $J = 6.0$  Hz, 2H), 6.61 (d,  $J = 7.5$  Hz, 1H), 4.83 (t,  $J = 7.8$  Hz, 1H), 3.8 (dd,  $J = 5.7, 5.7$  Hz, 1H), 3.16 (s, 3H), 3.12-3.01 (m, 1H).

**<sup>13</sup>C NMR (75 MHz, CDCl<sub>3</sub>):**  $\delta_{\text{C}}$  168.4, 145.0, 133.9, 132.6, 132.0, 131.8, 130.6, 129.1, 128.5, 128.1, 128.0, 126.3, 125.8, 125.3, 123.4, 123.1, 61.9, 36.9, 28.25.

**HRMS (ESI) m/z:**  $[\text{M}+\text{H}]^+$  calculated for C<sub>20</sub>H<sub>18</sub>NO: 288.1388, Found: 288.1392.

### 2-methyl-3-(phenanthren-9-ylmethyl)isoindolin-1-one **2bn**

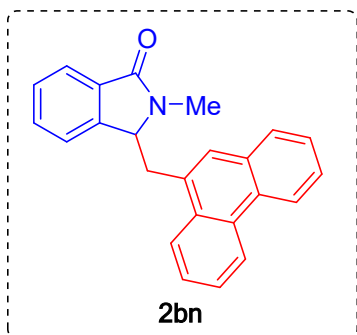

The title compound **2bn** (37 mg) was prepared by following general procedure D. Pure product was isolated using silica column chromatography. Pale yellow liquid, 64% yield (Solvent gradient: 15% ethylacetate in hexanes).

**<sup>1</sup>H NMR (300 MHz, CDCl<sub>3</sub>):**  $\delta_{\text{H}}$  8.83 (d,  $J = 7.8$  Hz, 1H), 8.74 (d,  $J = 8.1$  Hz, 1H), 8.15 (d,  $J = 7.5$  Hz, 1H), 7.89-7.82 (m, 2H), 7.76-7.59 (m, 5H), 7.42 (t,  $J = 7.2$  Hz, 1H), 7.27 (s, 1H), 6.79 (d,  $J = 7.5$  Hz, 1H), 4.94 (dd,  $J = 6.6, 6.0$  Hz, 1H), 3.92 (dd,  $J = 5.7, 5.7$  Hz, 1H), 3.19 (s, 3H).

**<sup>13</sup>C NMR (75 MHz, CDCl<sub>3</sub>):**  $\delta_{\text{C}}$  168.5, 145.3, 132.2, 131.4, 131.1, 130.9, 130.8, 130.2, 129.3, 128.3, 128.2, 127.1, 127.0, 126.9, 126.7, 123.9, 123.7, 123.6, 123.2, 122.6, 61.7, 37.7, 28.4.

**HRMS (ESI) m/z:** [M+H]<sup>+</sup> calculated for C<sub>24</sub>H<sub>20</sub>NO: 338.1544, Found: 338.1554.

### 2-methyl-3-pentylisoindolin-1-one **2bo**

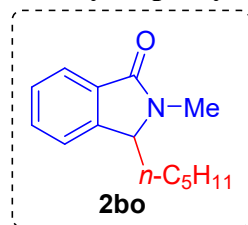

The title compound **2bo** (11 mg) was prepared by following general procedure D. Pure product was isolated using silica column chromatography. Yellow liquid, 32% yield (Solvent gradient: 15% ethylacetate in hexanes).

**<sup>1</sup>H NMR (300 MHz, CDCl<sub>3</sub>):**  $\delta_{\text{H}}$  7.82 (d,  $J = 7.5$  Hz, 1H), 7.54-7.49 (m, 1H), 7.46-7.39 (m, 2H), 4.48 (t,  $J = 4.2$  Hz, 1H), 3.10 (s, 3H), 2.01-1.92 (m, 2H), 1.25-1.19 (m, 6H), 0.81 (t,  $J = 6.9$  Hz, 3H).

**<sup>13</sup>C NMR (75 MHz, CDCl<sub>3</sub>):**  $\delta_{\text{C}}$  168.6, 145.1, 132.8, 131.1, 127.9, 123.4, 121.8, 61.5, 31.7, 30.5, 27.2, 22.4, 22.0, 13.9.

### 3-benzyl-6-chloro-2-phenylisoindolin-1-one **2ca**

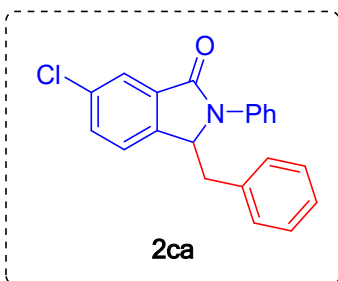

The title compound **2ca** (35 mg) was prepared by following general procedure D. Pure product was isolated using silica column chromatography. Pale yellow liquid, 63% yield (Solvent gradient: 2% ethylacetate in hexanes).

**<sup>1</sup>H NMR (300 MHz, CDCl<sub>3</sub>):**  $\delta_{\text{H}}$  7.85-7.83 (m, 1H), 7.66 (d,  $J = 7.8$  Hz, 2H), 7.52-7.45 (m, 4H), 7.17-7.16 (m, 3H), 7.07 (d,  $J = 6.9$  Hz, 1H), 6.88-6.85 (m, 2H), 5.47 (dd,  $J = 3.6, 3.6$  Hz, 1H), 3.39 (dd,  $J = 3.3, 3.6$  Hz, 1H), 2.87 (dd,  $J = 8.1, 8.1$  Hz, 1H).

**<sup>13</sup>C NMR (75 MHz, CDCl<sub>3</sub>):**  $\delta_{\text{C}}$  167.0, 144.0, 137.1, 135.2, 132.3, 131.5, 129.6, 129.2, 128.4, 128.2, 126.9, 125.4, 124.1, 123.3, 122.9, 61.3, 38.1.

**HRMS (ESI) m/z:** [M+H]<sup>+</sup> calculated for C<sub>21</sub>H<sub>17</sub>ClNO: 334.0998, Found: 334.0993.

### 3-benzyl-6-methoxy-2-phenylisoindolin-1-one **2cb**

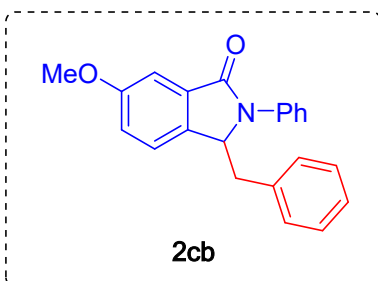

The title compound **2cb** (42 mg) was prepared by following general procedure D. Pure product was isolated using silica column chromatography. Pale yellow liquid, 75% yield (Solvent gradient: 2% ethylacetate in hexanes).

**<sup>1</sup>H NMR (300 MHz, CDCl<sub>3</sub>):**  $\delta_{\text{H}}$  7.57-7.54 (m, 2H), 7.43-7.38 (m, 2H), 7.23-7.15 (m, 2H), 7.09-7.07 (m, 3H), 6.95 (dd,  $J = 2.4, 2.4$  Hz, 1H), 6.79-6.77 (m, 3H), 5.30 (dd,  $J = 3.6, 3.3$  Hz, 1H), 3.75 (s, 3H), 3.26 (dd,  $J = 3.6, 3.3$  Hz, 1H), 2.72 (dd,  $J = 8.1, 8.1$  Hz, 1H).

**<sup>13</sup>C NMR (75 MHz, CDCl<sub>3</sub>):**  $\delta_{\text{C}}$  166.9, 160.2, 137.2, 136.3, 135.4, 133.6, 129.6, 129.2, 128.2, 126.9, 125.4, 123.3, 120.1, 106.4, 60.9, 55.6, 38.2.

**HRMS (ESI) m/z:** [M+H]<sup>+</sup> calculated for C<sub>22</sub>H<sub>20</sub>NO<sub>2</sub>: 330.1494, Found: 330.1496.

### 11-benzylisoindolo[2,1-a]quinazolin-5(11H)-one **5aa**

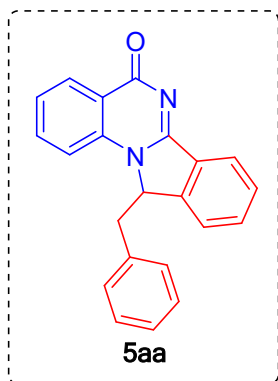

The title compound **5aa** (41 mg) was prepared by following general procedure E. Pure product was isolated using silica column chromatography. Pale yellow solid, 58% yield (Solvent gradient: 60% ethylacetate in hexanes).

**<sup>1</sup>H NMR (300 MHz, CDCl<sub>3</sub>):**  $\delta_{\text{H}}$  8.41 (d,  $J = 7.5$  Hz, 1H), 8.02 (d,  $J = 7.5$  Hz, 1H), 7.81 (t,  $J = 7.2$  Hz, 1H), 7.58-7.45 (m, 4H), 7.22-7.05 (m, 4H), 6.70 (d,  $J = 7.2$  Hz, 2H), 5.72 (dd,  $J = 3.0, 2.7$  Hz, 1H), 3.69 (dd,  $J = 2.7, 3.0$  Hz, 1H), 3.25 (dd,  $J = 7.5, 7.5$  Hz, 1H).

**<sup>13</sup>C NMR (75 MHz, CDCl<sub>3</sub>):**  $\delta_{\text{C}}$  170.3, 160.4, 143.6, 138.3, 133.6, 133.3, 132.5, 132.3, 129.8, 129.3, 129.2, 128.4, 127.5, 125.6, 124.5, 122.8, 119.6, 114.4, 63.5, 39.0.

**HRMS (ESI) m/z:** [M+H]<sup>+</sup> calculated for C<sub>22</sub>H<sub>17</sub>N<sub>2</sub>O: 325.1340, Found: 325.1350.

### 11-(4-methylbenzyl)isoindolo[2,1-a]quinazolin-5(11H)-one **5ab**

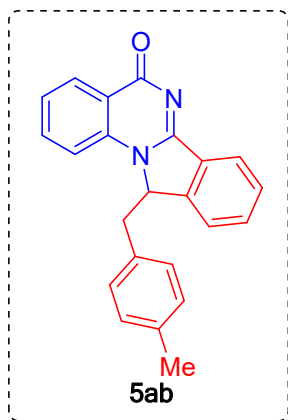

The title compound **5ab** (38 mg) was prepared by following general procedure E. Pure product was isolated using silica column chromatography. Pale yellow solid, 51% yield (Solvent gradient: 60% ethylacetate in hexanes).

**<sup>1</sup>H NMR (300 MHz, CDCl<sub>3</sub>):** δ<sub>H</sub> 8.44 (d, *J* = 8.1 Hz, 1H), 8.07 (d, *J* = 7.2 Hz, 1H), 7.86-7.80 (m, 1H), 7.59-7.48 (m, 5H), 6.89 (d, *J* = 7.8 Hz, 2H), 6.58 (d, *J* = 8.1 Hz, 2H), 5.71 (dd, *J* = 2.7, 2.7 Hz, 1H), 3.66 (dd, *J* = 2.7, 3 Hz, 1H), 3.24 (dd, *J* = 7.5, 7.5 Hz, 1H), 2.23 (s, 3H).

**<sup>13</sup>C NMR (75 MHz, CDCl<sub>3</sub>):** δ<sub>C</sub> 170.7, 160.5, 143.7, 138.3, 137.3, 133.9, 132.5, 132.2, 129.9, 129.7, 129.4, 129.2, 129.1, 125.8, 124.5, 122.9, 119.4, 114.6, 63.7, 38.5, 21.0.

**HRMS (ESI) m/z:** [M+H]<sup>+</sup> calculated for C<sub>23</sub>H<sub>19</sub>N<sub>2</sub>O: 339.1497, Found: 339.1495

### 11-(4-propylbenzyl)isoindolo[2,1-a]quinazolin-5(11H)-one **5ac**

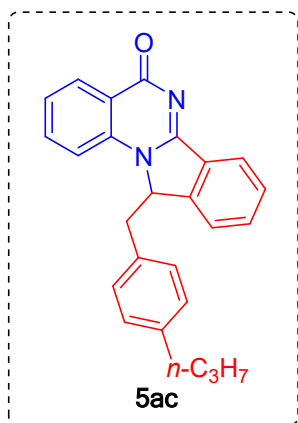

The title compound **5ac** (43 mg) was prepared by following general procedure E. Pure product was isolated using silica column chromatography. Pale yellow solid, 53% yield (Solvent gradient: 60% ethylacetate in hexanes).

**<sup>1</sup>H NMR (400 MHz, CDCl<sub>3</sub>):** δ<sub>H</sub> 8.44 (dd, *J* = 1.2, 1.2 Hz, 1H), 8.06 (d, *J* = 7.2 Hz, 1H), 7.81-7.79 (m, 1H), 7.57-7.54 (m, 2H), 7.52-7.48 (m, 2H), 7.20 (d, *J* = 7.6 Hz, 1H), 6.91 (d, *J* = 8.0 Hz, 2H), 6.64 (d, *J* = 8.0 Hz, 2H), 5.70 (dd, *J* = 3.2, 3.2 Hz, 1H), 3.68 (dd, *J* = 3.2, 3.2 Hz, 1H), 3.20 (dd, *J* = 8.0, 8.0 Hz, 1H), 2.47 (t, *J* = 7.6 Hz, 2H), 1.57-1.52 (m, 2H), 0.86 (t, *J* = 7.2 Hz, 3H).

**<sup>13</sup>C NMR (101 MHz, CDCl<sub>3</sub>):** δ<sub>C</sub> 170.6, 160.4, 143.8, 142.1, 138.3, 133.8, 132.4, 130.4, 129.8, 129.3, 129.1, 128.6, 125.7, 124.5, 122.9, 119.5, 114.5, 63.6, 38.6, 37.5, 24.3, 13.7.

**HRMS (ESI) m/z:** [M+H]<sup>+</sup> calculated for m/z C<sub>25</sub>H<sub>23</sub>N<sub>2</sub>O: 367.1810, Found: 367.1802.

### 11-(4-butylbenzyl)isoindolo[2,1-a]quinazolin-5(1H)-one **5ad**

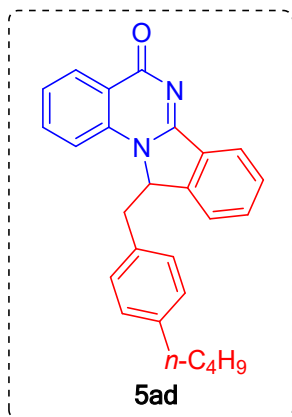

The title compound **5ad** (49 mg) was prepared by following general procedure E. Pure product was isolated using silica column chromatography. Pale yellow solid, 58% yield (Solvent gradient: 60% ethylacetate in hexanes).

**<sup>1</sup>H NMR (500 MHz, CDCl<sub>3</sub>):**  $\delta_{\text{H}}$  8.39 (d,  $J = 8$  Hz, 1H), 8.01 (d,  $J = 7.5$  Hz, 1H), 7.79 (t,  $J = 7.5$  Hz, 1H), 7.56-7.52 (m, 2H), 7.46 (t,  $J = 7.5$  Hz, 2H), 7.19 (d,  $J = 7.5$  Hz, 1H), 6.89 (d,  $J = 7.5$  Hz, 2H), 6.61 (d,  $J = 7.5$  Hz, 2H), 5.69 (d,  $J = 5$  Hz, 1H), 3.65 (dd,  $J = 2.5, 1.5$  Hz, 1H), 3.18 (dd,  $J = 8, 7.5$  Hz, 1H), 2.48 (t,  $J = 7.5$  Hz, 2H), 1.52-1.46 (m, 2H), 1.29-1.25 (m, 2H), 0.88 (t,  $J = 7.5$  Hz, 3H).

**<sup>13</sup>C NMR (125 MHz, CDCl<sub>3</sub>):**  $\delta_{\text{C}}$  170.5, 160.3, 143.8, 142.2, 138.2, 133.8, 132.4, 132.2, 130.3, 129.6, 129.2, 129.1, 128.5, 125.7, 124.4, 122.9, 119.4, 114.7, 63.6, 38.5, 35.1, 33.3, 22.2, 13.9.

**HRMS (ESI) m/z:** [M+H]<sup>+</sup> m/z calculated for C<sub>26</sub>H<sub>25</sub>N<sub>2</sub>O: 381.1966, Found: 381.1960.

### 11-(3-fluorobenzyl)isoindolo[2,1-a]quinazolin-5(1H)-one **5ae**

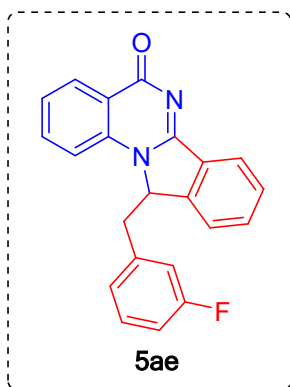

The title compound **5ae** (42 mg) was prepared by following general procedure E. Pure product was isolated using silica column chromatography. Pale yellow solid, 56% yield (Solvent gradient: 60% ethylacetate in hexanes)

**<sup>1</sup>H NMR (300 MHz, CDCl<sub>3</sub>):** δ<sub>H</sub> 8.34 (d, *J* = 7.8 Hz, 1H), 7.95 (d, *J* = 7.5 Hz, 1H), 7.78 (t, *J* = 7.8 Hz, 1H), 7.58-7.53 (m, 2H), 7.47-7.40 (m, 2H), 7.26 (d, *J* = 7.5 Hz, 1H), 7.04-6.97 (m, 1H), 6.80 (t, *J* = 8.1 Hz, 1H), 6.42-6.33 (m, 2H), 5.73 (dd, *J* = 2.4, 2.4 Hz, 1H), 3.64 (dd, *J* = 1.5, 1.5 Hz, 1H), 3.30 (dd, *J* = 7.2, 7.5 Hz, 1H).

**<sup>13</sup>C NMR (75 MHz, CDCl<sub>3</sub>):** δ<sub>C</sub> 170.3, 162.3 (d, *J* = 245.4 Hz), 160.2, 143.3, 138.1, 135.5 (d, *J* = 7.3 Hz), 133.9, 132.6, 132.2, 129.9 (d, *J* = 8.2 Hz), 129.5 (d, *J* = 11.8 Hz), 125.7, 124.94 (d, *J* = 2.7 Hz), 124.3, 122.8, 119.2, 116.2 (d, *J* = 21.4 Hz), 114.6, 114.5, 114.3, 63.1, 38.3.

**HRMS (ESI) m/z:** [M+H]<sup>+</sup> calculated for C<sub>22</sub>H<sub>16</sub>FN<sub>2</sub>O: 343.1246, Found: 343.1246.

### 11-(4-fluorobenzyl)isoindolo[2,1-a]quinazolin-5(1H)-one **5af**

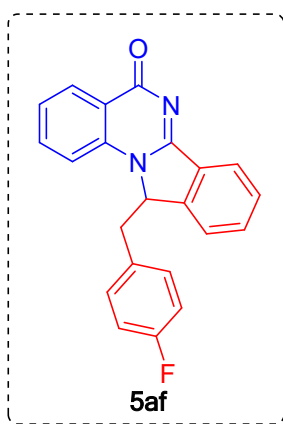

The title compound **5af** (41 mg) was prepared by following general procedure E. Pure product was isolated using silica column chromatography. Pale yellow solid, 54% yield (Solvent gradient: 60% ethylacetate in hexanes).

**<sup>1</sup>H NMR (300 MHz, CDCl<sub>3</sub>):** δ<sub>H</sub> 8.44 (d, *J* = 7.8 Hz, 1H), 8.04 (d, *J* = 6.0 Hz, 1H), 7.83 (t, *J* = 7.5 Hz, 1H), 7.62-7.49 (m, 4H), 7.29 (t, *J* = 7.2 Hz, 1H), 6.74 (t, *J* = 8.7 Hz, 2H), 6.60-6.56 (m, 2H), 5.74 (d, *J* = 4.2 Hz, 1H), 3.63 (d, *J* = 14.1 Hz, 1H), 3.37 (dd, *J* = 6.9, 6.9 Hz, 1H).

**<sup>13</sup>C NMR (75 MHz, CDCl<sub>3</sub>):** δ<sub>C</sub> 170.4, 162.0 (d, *J* = 245.4 Hz), 160.4, 143.3, 138.2, 133.9, 132.6, 132.4, 130.8 (d, *J* = 8.0 Hz), 129.9, 129.5, 128.6 (d, *J* = 3.2 Hz), 125.9, 124.6, 122.7, 119.4, 115.4 (d, *J* = 21.3 Hz), 114.4, 63.3, 37.9.

**HRMS (ESI) m/z:** [M+H]<sup>+</sup> calculated for C<sub>22</sub>H<sub>16</sub>FN<sub>2</sub>O: 343.1246, Found: 343.1246.

#### 4-((5-oxo-5,11-dihydroisoindolo[2,1-a]quinazolin-11-yl)methyl)benzonitrile **5ag**

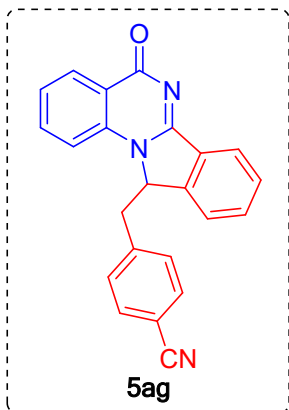

The title compound **5ag** (42 mg) was prepared by following general procedure E. Pure product was isolated using silica column chromatography. Pale yellow solid, 55% yield (Solvent gradient: 60% ethylacetate in hexanes).

**<sup>1</sup>H NMR (400 MHz, CDCl<sub>3</sub>):**  $\delta_{\text{H}}$  8.41 (dd,  $J = 1.2, 1.2$  Hz, 1H), 7.98 (d,  $J = 7.6$  Hz, 1H), 7.85-7.80 (m, 1H), 7.64-7.60 (m, 1H), 7.55-7.48 (m, 3H), 7.35 (d,  $J = 7.6$  Hz, 1H), 7.31 (d,  $J = 8.4$  Hz, 2H), 6.69 (d,  $J = 8.0$  Hz, 2H), 5.80 (dd,  $J = 2.8, 2.8$  Hz, 1H), 3.67 (dd,  $J = 2.8, 2.8$  Hz, 1H), 3.53 (dd,  $J = 6.8, 6.8$  Hz, 1H).

**<sup>13</sup>C NMR (101 MHz, CDCl<sub>3</sub>):**  $\delta_{\text{C}}$  170.1, 160.2, 142.7, 138.4, 138.0, 134.0, 132.8, 132.4, 132.0, 130.1, 130.0, 129.7, 126.0, 124.7, 122.5, 119.3, 118.1, 114.2, 111.6, 62.6, 38.5.

**HRMS (ESI) m/z:** [M+H]<sup>+</sup> calculated for C<sub>23</sub>H<sub>16</sub>N<sub>3</sub>O: 350.1293, Found: 350.1289.

#### 11-(3-nitrobenzyl)isoindolo[2,1-a]quinazolin-5(11H)-one **5ah**

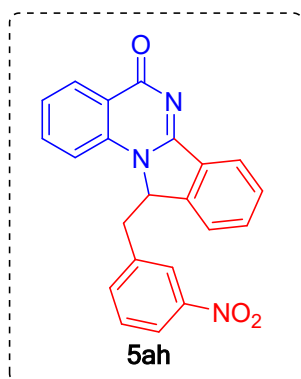

The title compound **5ah** (39 mg) was prepared by following general procedure E. Pure product was isolated using silica column chromatography. Yellow solid, 48% yield (Solvent gradient: 60% ethylacetate in hexanes).



**<sup>1</sup>H NMR (400 MHz, CDCl<sub>3</sub>):** δ<sub>H</sub> 8.35 (d, *J* = 7.6 Hz, 1H), 7.91 (d, *J* = 7.2 Hz, 2H), 7.83 (s, 1H), 7.64-7.58 (m, 2H), 7.47 (d, *J* = 6.0 Hz, 2H), 7.42 (d, *J* = 8.0 Hz, 2H), 7.15 (t, *J* = 7.2 Hz, 1H), 6.80 (d, *J* = 6.0 Hz, 1H), 5.85 (s, 1H), 3.73-3.69 (m, 1H), 3.62 (dd, *J* = 5.2, 5.6 Hz, 1H).

**<sup>13</sup>C NMR (101 MHz, CDCl<sub>3</sub>):** δ<sub>C</sub> 170.1, 160.2, 147.7, 142.6, 138.0, 135.1, 134.7, 134.2, 133.0, 132.2, 129.8, 129.7, 129.3, 126.0, 124.5, 124.1, 122.6, 122.5, 119.2, 114.4, 62.7, 38.0.

**HRMS (ESI) m/z:** [M+H]<sup>+</sup> calculated for C<sub>22</sub>H<sub>16</sub>N<sub>3</sub>O<sub>3</sub>: 370.1191, Found: 370.1191.

**11-(4-nitrobenzyl)isoindolo[2,1-a]quinazolin-5(11H)-one **5ai****

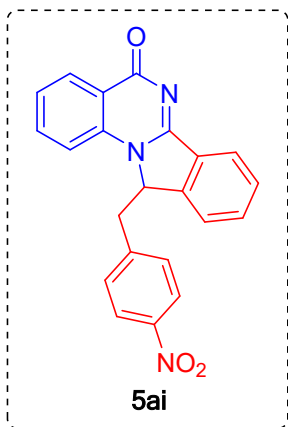

The title compound **5ai** (42 mg) was prepared by following general procedure E. Pure product was isolated using silica column chromatography. Yellow solid, 51% yield (Solvent gradient: 60% ethylacetate in hexanes).

**<sup>1</sup>H NMR (400 MHz, CDCl<sub>3</sub>):** δ<sub>H</sub> 8.35 (d, *J* = 6.4 Hz, 1H), 7.92-7.82 (m, 4H), 7.60 (s, 2H), 7.47-7.41 (m, 3H), 6.71 (d, *J* = 6.4 Hz, 2H), 5.86 (s, 1H), 3.71 (d, *J* = 13.2 Hz, 1H), 3.63 (d, *J* = 4.8 Hz, 1H).

**<sup>13</sup>C NMR (101 MHz, CDCl<sub>3</sub>):** δ<sub>C</sub> 170.1, 160.2, 147.2, 142.7, 140.4, 138.0, 134.2, 132.9, 132.2, 130.1, 129.8, 129.7, 126.0, 124.5, 123.3, 122.6, 119.2, 114.4, 62.7, 38.1.

**HRMS (ESI) m/z:** [M+H]<sup>+</sup> calculated for C<sub>22</sub>H<sub>16</sub>N<sub>3</sub>O<sub>3</sub>: 370.1191, Found: 370.1189.

### 11-([1,1'-biphenyl]-4-ylmethyl)isoindolo[2,1-a]quinazolin-5(1H)-one **5aj**

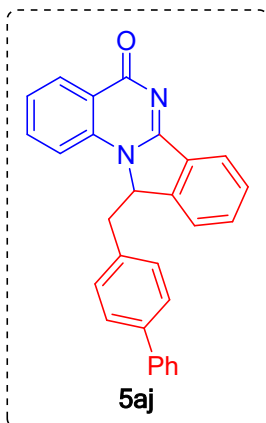

The title compound **5aj** (51 mg) was prepared by following general procedure E. Pure product was isolated using silica column chromatography. Pale yellow solid, 58% yield (Solvent gradient: 60% ethylacetate in hexanes).

**<sup>1</sup>H NMR (300 MHz, CDCl<sub>3</sub>):**  $\delta_{\text{H}}$  8.41 (d,  $J = 7.8$  Hz, 1H), 8.03 (d,  $J = 7.2$  Hz, 1H), 7.81 (t,  $J = 7.5$  Hz, 1H), 7.59-7.53 (m, 2H), 7.50-7.45 (m, 4H), 7.39 (t,  $J = 7.5$  Hz, 2H), 7.32 (d,  $J = 7.8$  Hz, 3H), 7.25 (d,  $J = 6.0$  Hz, 1H), 6.77 (d,  $J = 7.8$  Hz, 2H), 5.73 (dd,  $J = 3.0, 2.4$  Hz, 1H), 3.72 (dd,  $J = 3.0$  Hz, 2.4 Hz, 1H), 3.28 (dd,  $J = 7.5$  Hz, 7.5 Hz, 1H).

**<sup>13</sup>C NMR (75 MHz, CDCl<sub>3</sub>):**  $\delta_{\text{C}}$  170.5, 160.3, 143.6, 140.3, 140.1, 138.2, 133.8, 132.5, 132.3, 132.2, 129.7, 129.3, 128.7, 127.4, 127.0, 126.9, 125.7, 124.5, 122.9, 119.4, 114.6, 63.5, 38.5.

**HRMS (ESI) m/z:**  $[M+H]^+$  m/z calculated for C<sub>28</sub>H<sub>21</sub>N<sub>2</sub>O: 401.1653, Found: 401.1652.

### 11-(naphthalen-1-ylmethyl)isoindolo[2,1-a]quinazolin-5(1H)-one **5ak**

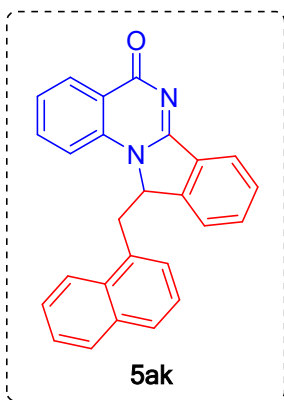

The title compound **5ak** (32 mg) was prepared by following general procedure E. Pure product was isolated using silica column chromatography. Pale yellow solid, 39% yield (Solvent gradient: 60% ethylacetate in hexanes).

**<sup>1</sup>H NMR (400 MHz, CDCl<sub>3</sub>):** δ<sub>H</sub> 8.44 (dd, *J* = 1.2, 1.2 Hz, 1H), 8.15 (d, *J* = 7.6 Hz, 1H), 7.91-7.86 (m, 2H), 7.83 (d, *J* = 8 Hz, 1H), 7.76-7.72 (m, 1H), 7.53-7.44 (m, 5H), 7.38-7.35 (m, 1H), 7.32-7.28 (m, 1H), 7.15 (d, *J* = 7.2 Hz, 1H), 6.54 (d, *J* = 8.0 Hz, 1H), 5.90 (dd, *J* = 5.2, 4.8 Hz, 1H), 4.25 (dd, *J* = 5.2, 4.8 Hz, 1H), 3.27 (dd, *J* = 9.2, 9.2 Hz, 1H).

**<sup>13</sup>C NMR (101 MHz, CDCl<sub>3</sub>):** δ<sub>C</sub> 170.5, 160.3, 143.6, 138.3, 133.8, 133.6, 132.0, 131.9, 130.9, 129.7, 129.3, 129.2, 128.7, 128.6, 126.5, 126.0, 125.7, 125.2, 124.6, 123.6, 122.9, 119.6, 114.6, 63.1, 37.3.

**HRMS (ESI) m/z:** [M+H]<sup>+</sup> calculated for C<sub>26</sub>H<sub>19</sub>N<sub>2</sub>O: 375.1497, Found: 375.1497.

**12-benzyl-[1,3]dioxolo[4',5':5,6]isoindolo[2,1-a]quinazolin-5(12H)-one **5al****

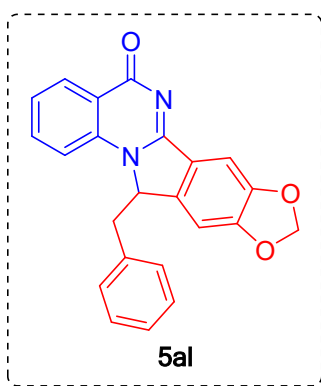

The title compound **5al** (42 mg) was prepared by following general procedure E. Pure product was isolated using silica column chromatography. Pale yellow solid, 52% yield (Solvent gradient: 60% ethylacetate in hexanes).

**<sup>1</sup>H NMR (400 MHz, CDCl<sub>3</sub>):** δ<sub>H</sub> 8.23 (d, *J* = 8 Hz, 1H), 7.68 (t, *J* = 7.2 Hz, 1H), 7.42 (d, *J* = 8 Hz, 1H), 7.32 (t, *J* = 7.6 Hz, 1H), 7.22 (s, 1H), 7.07-6.99 (m, 3H), 6.63 (d, *J* = 7.2 Hz, 2H), 6.49 (s, 1H), 5.98 (d, *J* = 8.8 Hz, 2H), 5.52 (d, *J* = 4.8 Hz, 1H), 3.56-3.50 (m, 1H), 3.11 (dd, *J* = 7.2, 7.2 Hz, 1H).

**<sup>13</sup>C NMR (101 MHz, CDCl<sub>3</sub>):** δ<sub>C</sub> 169.9, 159.9, 152.3, 148.9, 140.0, 138.2, 133.9, 133.1, 129.4, 129.2, 128.5, 127.5, 125.5, 125.4, 118.8, 114.5, 103.4, 103.3, 102.4, 63.2, 38.8.

**HRMS (ESI) m/z:** [M+H]<sup>+</sup> m/z calculated for C<sub>23</sub>H<sub>17</sub>N<sub>2</sub>O<sub>3</sub>: 369.1239, Found: 369.1231.

## 11. References:

1. B. Yao, C. Jaccoud, Q. Wang and J. Zhu, *Chem. Eur. J.*, 2012, **18**, 5864-5868.
2. B. Tang and R. Hua, *Molecules*, 2022, **27**, 3393.
3. A. D. Sonawane, R. A. Sonawane, K. M. N. Win, M. Ninomiya and M. Koketsu, *Org. Biomol. Chem.*, 2020, **18**, 2129– 2138.
4. C. Kanazawa and M. Terada, *Chem. Asian J.*, 2009, **4**, 1668– 1672.
5. A. D. Sonawane, R. A. Sonawane, K. M. N. Win, M. Ninomiya and M. Koketsu, *Org. Biomol. Chem.*, 2020, **18**, 2129– 2138.
6. Z. Y. Chen, L. Y. Wu, H. S. Fang, T. Zhang, Z. F. Mao, Y. Zou, X. J. Zhang and M. Yan, *Adv. Synth. Catal.*, 2017, **359**, 3894–3899.
7. M. Hari Balakrishnan and S. Mannathan, *Org. Lett.*, 2020, **22**, 542–546.
8. N. G. Kundu and M. W. Khan, *Tetrahedron*, 2000, **56**, 4777-4792.
9. N. Muniraj and K. R. Prabhu, *Adv. Synth. Catal.*, 2018, **360**, 3579-3584.

## 12. Copies of NMR and HRMS data

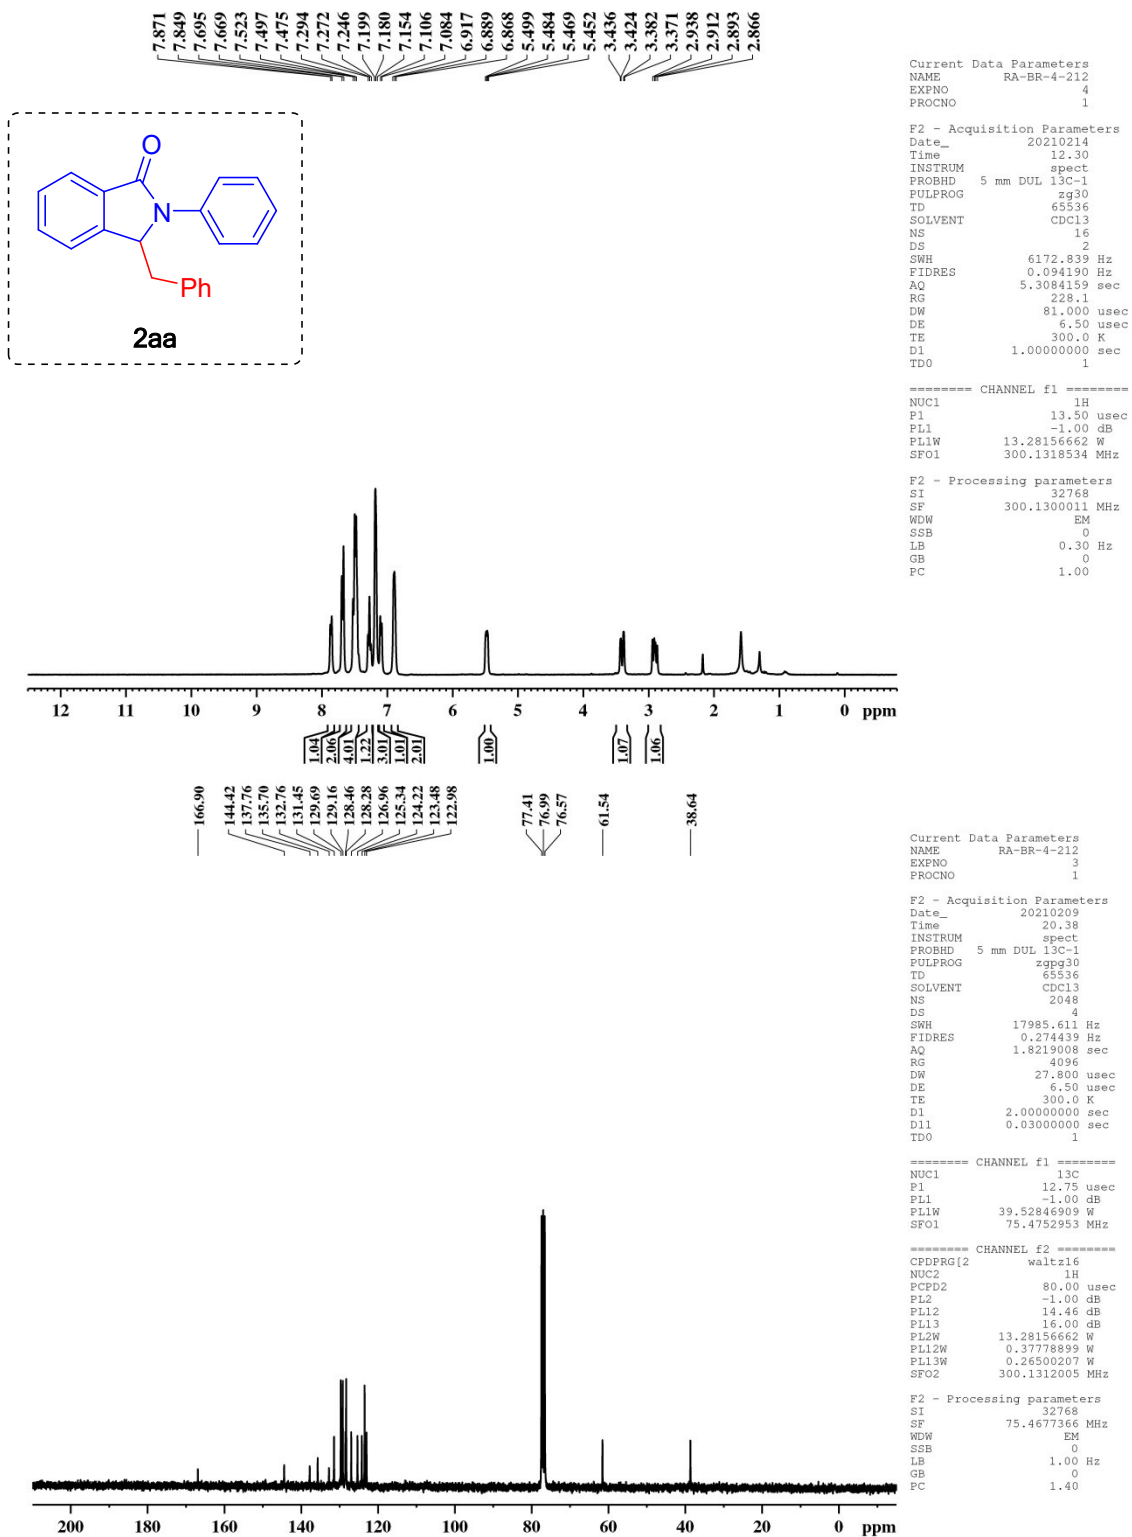

$^1\text{H}$  and  $^{13}\text{C}$  NMR Spectra of compound 2aa

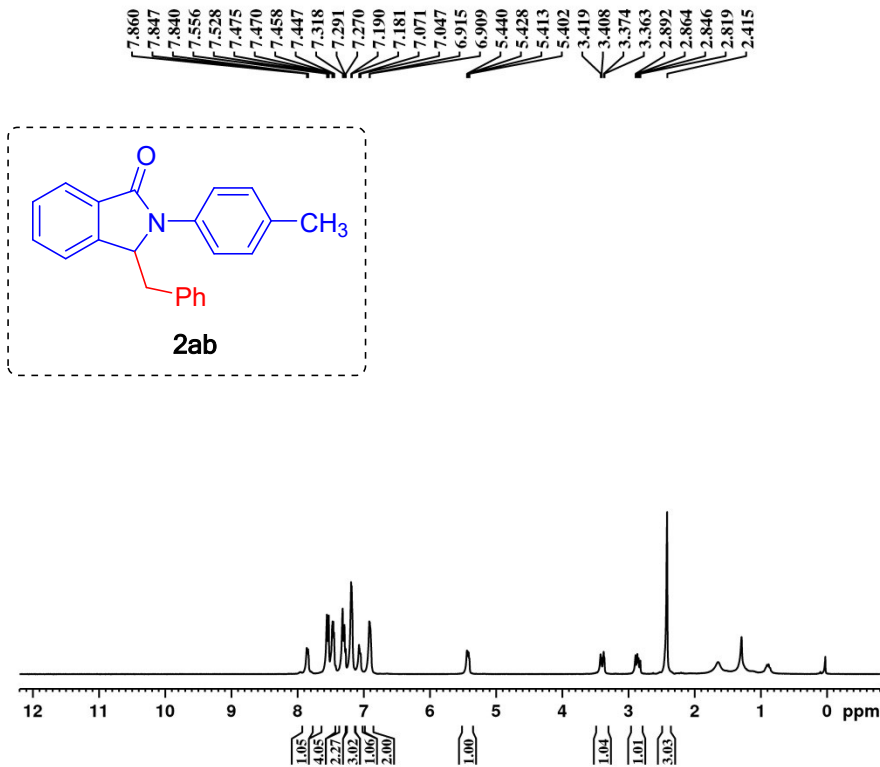

```

Current Data Parameters
NAME RA-BR-4-225
EXPNO 3
PROCNO 1

F2 - Acquisition Parameters
Date_ 20210418
Time 12.33
INSTRUM spect
PROBHD 5 mm DUL 13C-1
PULPROG zg30
TD 65536
SOLVENT CDCl3
NS 16
DS 2
SWH 6172.839 Hz
FIDRES 0.094190 Hz
AQ 5.3084159 sec
RG 181
DW 81.000 usec
DE 6.50 usec
TE 300.0 K
D1 1.00000000 sec
TDO 1

===== CHANNEL f1 =====
NUC1 1H
P1 13.50 usec
PL1 -1.00 dB
PL1W 13.28156662 W
SFO1 300.1318534 MHz

```

```

F2 - Processing parameters
SI 32768
SF 300.1300011 MHz
WDW EM
SSB 0
LB 0.30 Hz
GB 0
PC 1.00

```

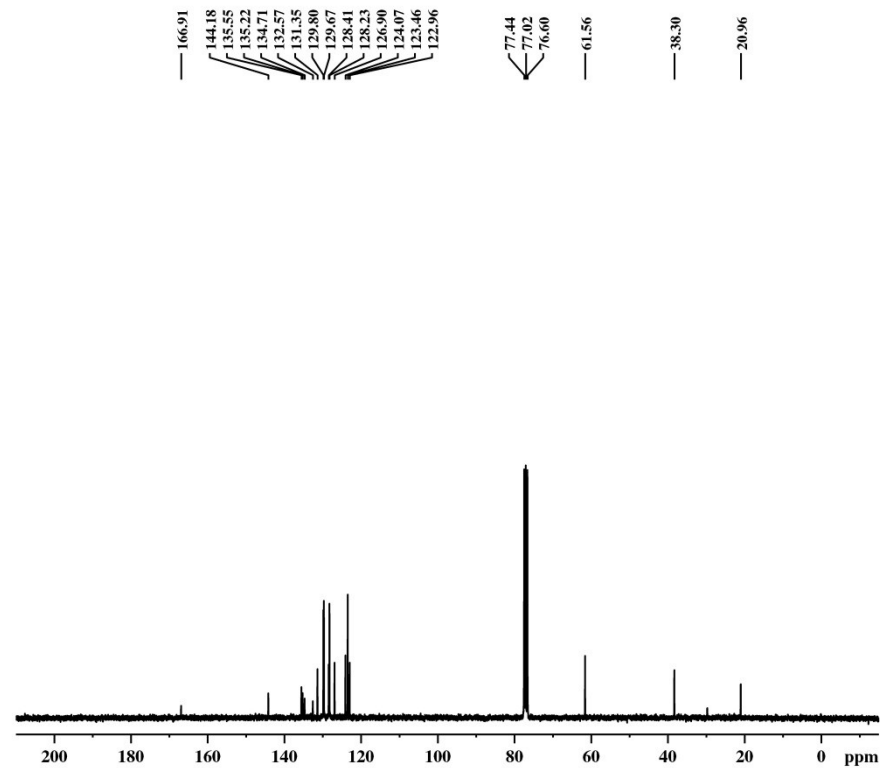

```

Current Data Parameters
NAME RA-BR-4-225
EXPNO 2
PROCNO 1

F2 - Acquisition Parameters
Date_ 20210418
Time 11.29
INSTRUM spect
PROBHD 5 mm DUL 13C-1
PULPROG zgpg30
TD 65536
SOLVENT CDCl3
NS 1024
DS 4
SWH 17985.611 Hz
FIDRES 0.274439 Hz
AQ 1.8219008 sec
RG 2298.8
DW 27.800 usec
DE 6.50 usec
TE 300.0 K
D1 2.00000000 sec
D11 0.03000000 sec
TDO 1

===== CHANNEL f1 =====
NUC1 13C
P1 12.75 usec
PL1 -1.00 dB
PL1W 39.52846909 W
SFO1 75.4752953 MHz

```

```

===== CHANNEL f2 =====
CPDPRG2 waltz16
NUC2 1H
PCPD2 80.00 usec
PL2 -1.00 dB
PL12 14.46 dB
PL13 16.00 dB
PL2W 13.28156662 W
PL12W 0.37778899 W
PL13W 0.26500207 W
SFO2 300.1312005 MHz

F2 - Processing parameters
SI 32768
SF 75.4677447 MHz
NDW EM
SSB 0
LB 1.00 Hz
GB 0
PC 1.40

```

**<sup>1</sup>H and <sup>13</sup>C NMR Spectra of compound 2ab**

**HRMS**  
**Spectrum of**  
**compound**

DR.RA  
RA-BR-4-225 54 (1.999)

1: TOF MS ES+  
6.93e4

**2ab**

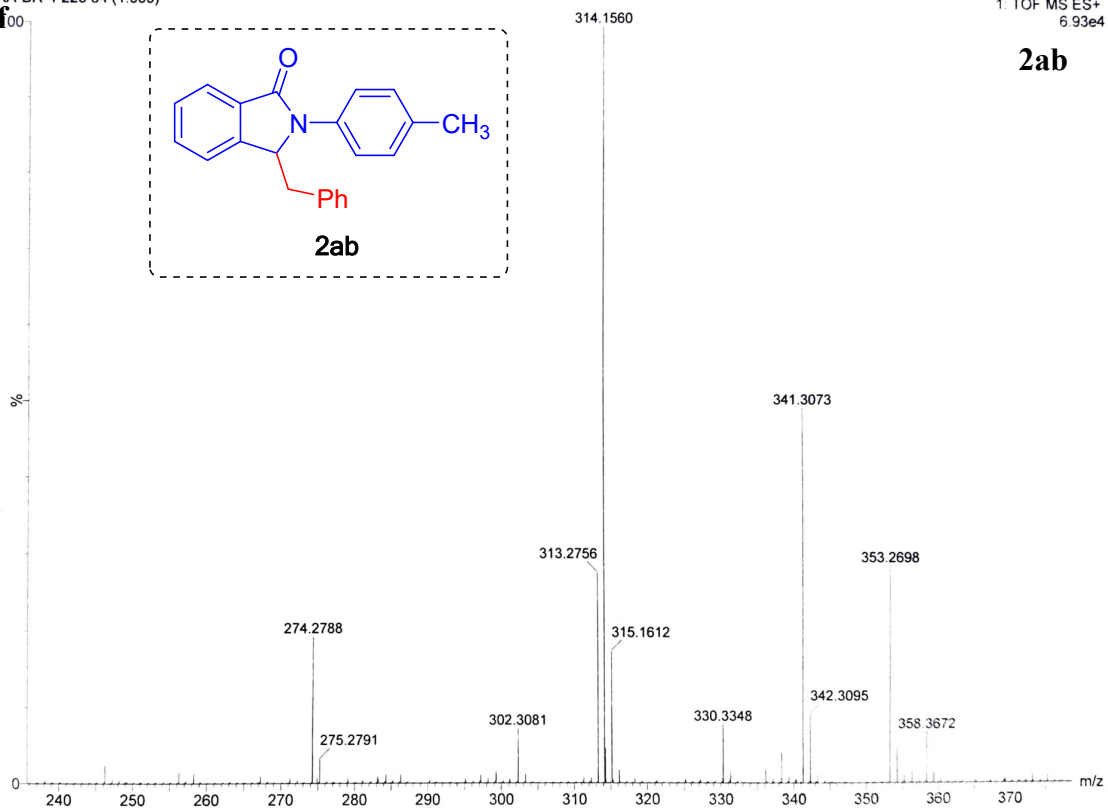

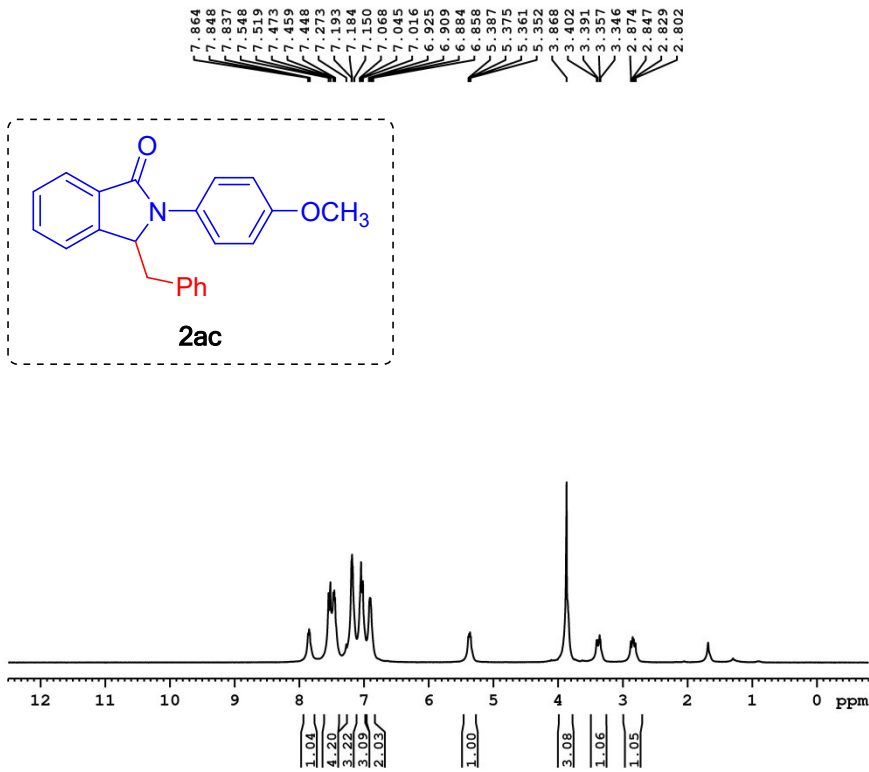

```

Current Data Parameters
NAME RA-BR-4-216
EXPNO 2
PROCNO 1

F2 - Acquisition Parameters
Date_ 20210202
Time 16.37
INSTRUM spect
PROBHD 5 mm DUL 13C-1
PULPROG zg30
TD 65536
SOLVENT CDCl3
NS 16
DS 2
SWH 6172.839 Hz
FIDRES 0.094190 Hz
AQ 5.3084159 sec
RG 128
DW 81.000 usec
DE 6.50 usec
TE 300.0 K
D1 1.00000000 sec
TDO 1

===== CHANNEL f1 =====
NUC1 1H
P1 13.50 usec
PL1 -1.00 dB
PL1W 13.28156662 W
SFO1 300.1318534 MHz

F2 - Processing parameters
SI 32768
SF 300.1300011 MHz
WDW EM
SSB 0
LB 0.30 Hz
GB 0
PC 1.00

```

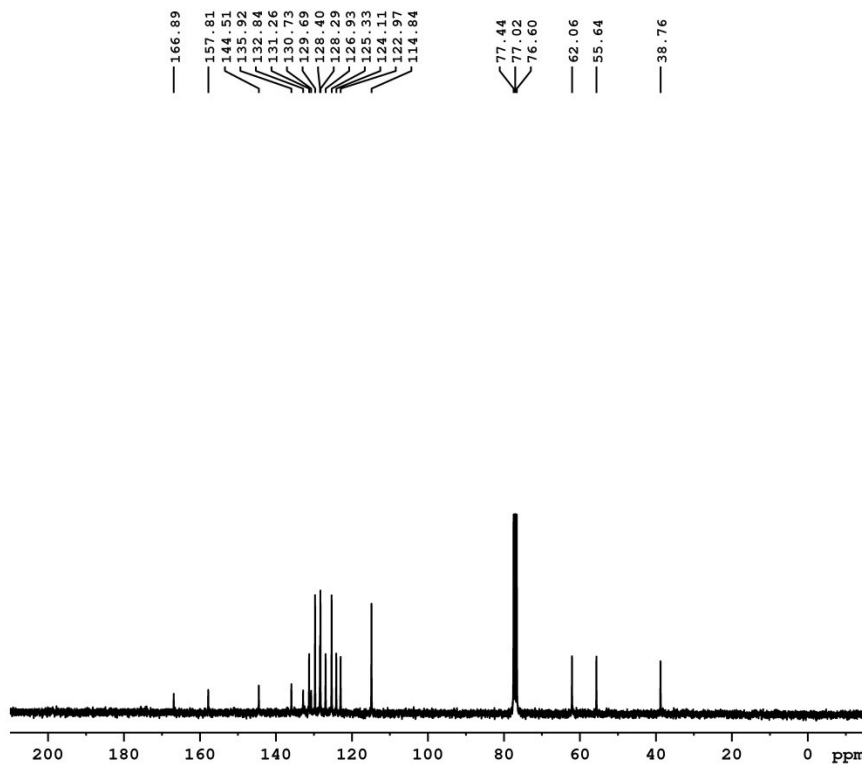

```

Current Data Parameters
NAME RA-BR-4-216
EXPNO 3
PROCNO 1

F2 - Acquisition Parameters
Date_ 20210202
Time 18.09
INSTRUM spect
PROBHD 5 mm DUL 13C-1
PULPROG zgpg30
TD 65536
SOLVENT CDCl3
NS 1403
DS 4
SWH 17985.611 Hz
FIDRES 0.274439 Hz
AQ 1.8219008 sec
RG 4597.6
DW 27.800 usec
DE 6.50 usec
TE 300.0 K
D1 2.00000000 sec
D11 0.03000000 sec
TDO 1

===== CHANNEL f1 =====
NUC1 13C
P1 12.75 usec
PL1 -1.00 dB
PL1W 39.52846909 W
SFO1 75.4752953 MHz

===== CHANNEL f2 =====
CPDPRG2 waltz16
NUC2 1H
PCPD2 80.00 usec
PL2 -1.00 dB
PL12 14.46 dB
PL13 16.00 dB
PL2W 13.28156662 W
PL12W 0.37778899 W
PL13W 0.26500207 W
SFO2 300.1312005 MHz

F2 - Processing parameters
SI 32768
SF 75.4677357 MHz
WDW EM
SSB 0
LB 1.00 Hz
GB 0
PC 1.40

```

<sup>1</sup>H and <sup>13</sup>C NMR Spectra of compound **2ac**



7.844  
7.822  
7.817  
7.596  
7.589  
7.580  
7.573  
7.566  
7.557  
7.550  
7.487  
7.482  
7.471  
7.465  
7.458  
7.447  
7.444  
7.248  
7.185  
7.178  
7.165  
7.158  
7.149  
7.143  
7.135  
7.128  
7.099  
7.094  
7.072  
6.855  
6.849  
6.838  
6.824  
5.412  
5.399  
5.386  
5.373  
3.370  
3.357  
3.324  
3.311  
2.908  
2.882  
2.862  
2.835

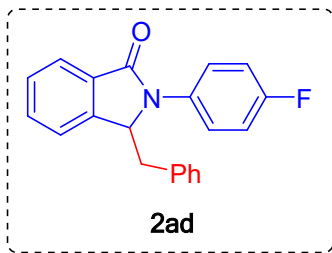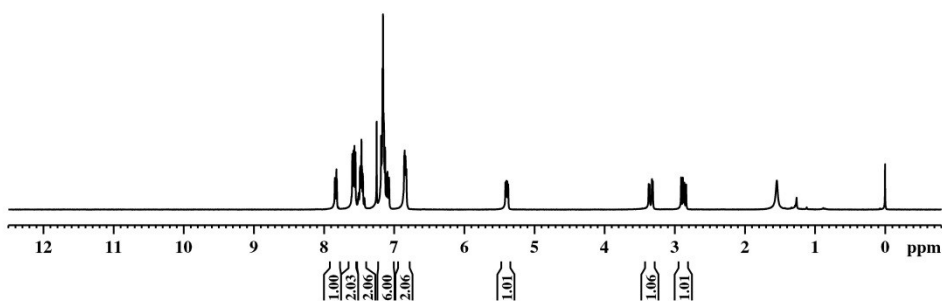

Current Data Parameters  
NAME RA-PS-19B  
EXPNO 3  
PROCNO 1

F2 - Acquisition Parameters  
Date\_ 20211006  
Time 12.55  
INSTRUM spect  
PROBHD 5 mm DUL 13C-1  
PULPROG zg30  
TD 65536  
SOLVENT CDCl3  
NS 16  
DS 2  
SWH 6172.839 Hz  
FIDRES 0.094190 Hz  
AQ 5.3084159 sec  
RG 322.5  
DW 81.000 usec  
DE 6.50 usec  
TE 300.0 K  
D1 1.00000000 sec  
TD0 1

===== CHANNEL f1 =====  
NUC1 1H  
P1 14.00 usec  
PL1 -2.00 dB  
PL1W 16.72050095 W  
SFO1 300.1318534 MHz

F2 - Processing parameters  
SI 32768  
SF 300.1300103 MHz  
WDW EM  
SSB 0  
LB 0.30 Hz  
GB 0  
PC 1.00

166.93  
161.85  
144.04  
135.20  
133.33  
132.17  
131.58  
129.52  
128.51  
126.97  
125.24  
125.13  
124.12  
122.90  
116.08  
115.78  
77.37  
76.94  
76.52  
61.65  
38.32

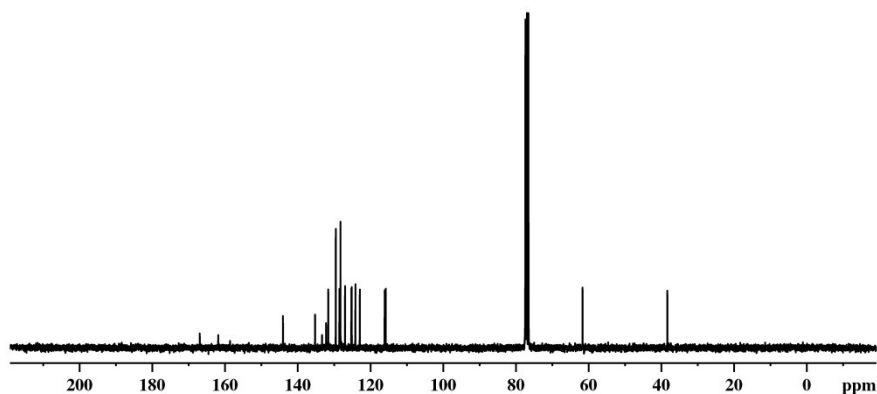

Current Data Parameters  
NAME RA-PS-19B  
EXPNO 2  
PROCNO 1

F2 - Acquisition Parameters  
Date\_ 20211006  
Time 12.52  
INSTRUM spect  
PROBHD 5 mm DUL 13C-1  
PULPROG zgpg30  
TD 65536  
SOLVENT CDCl3  
NS 4  
DS 4  
SWH 17985.611 Hz  
FIDRES 0.274439 Hz  
AQ 1.8219008 sec  
RG 2048  
DW 27.800 usec  
DE 6.50 usec  
TE 300.0 K  
D1 2.00000000 sec  
D11 0.03000000 sec  
TD0 1

===== CHANNEL f1 =====  
NUC1 13C  
P1 10.63 usec  
PL1 -2.00 dB  
PL1W 49.76339722 W  
SFO1 75.4752953 MHz

===== CHANNEL f2 =====  
CPDPRG2 waltz16  
NUC2 1H  
PCPD2 80.00 usec  
PL2 -2.00 dB  
PL12 13.46 dB  
PL13 16.00 dB  
PL2W 16.72050095 W  
PL12W 0.47560814 W  
PL13W 0.26500207 W  
SFO2 300.1312005 MHz

F2 - Processing parameters  
SI 32768  
SF 75.4677490 MHz  
WDW EM  
SSB 0  
LB 1.00 Hz  
GB 0  
PC 1.40

**<sup>1</sup>H and <sup>13</sup>C NMR Spectra of compound 2ad**

DR.RA  
PS-01-19B 3 (0.127) AM2 (Ar,20000.0,556.28,0.00,LS 10); Cm (2.7)

1: TOF MS ES+  
7.06e6

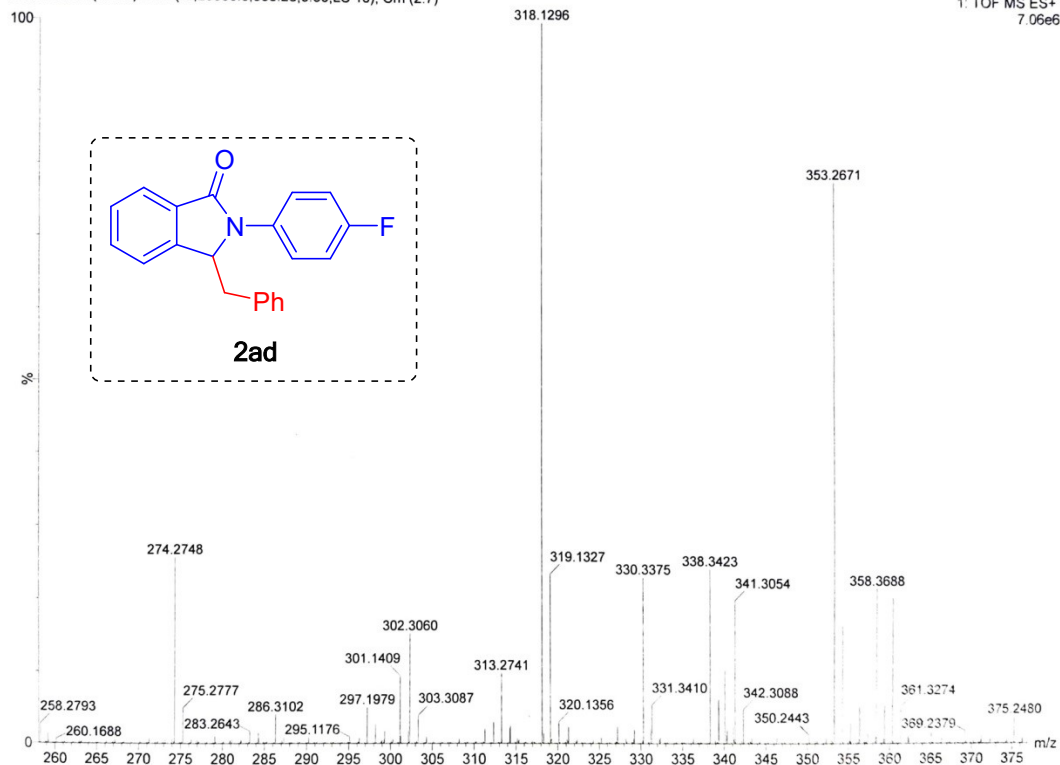

**HRMS Spectrum of compound 2ad**

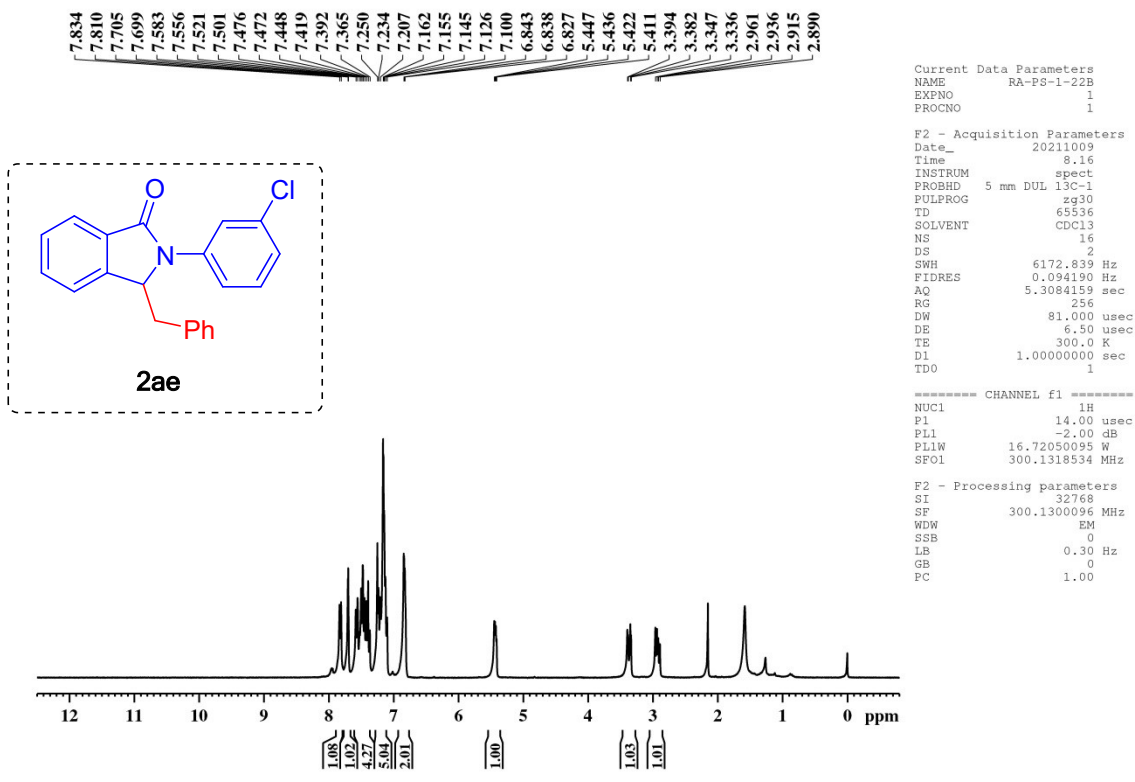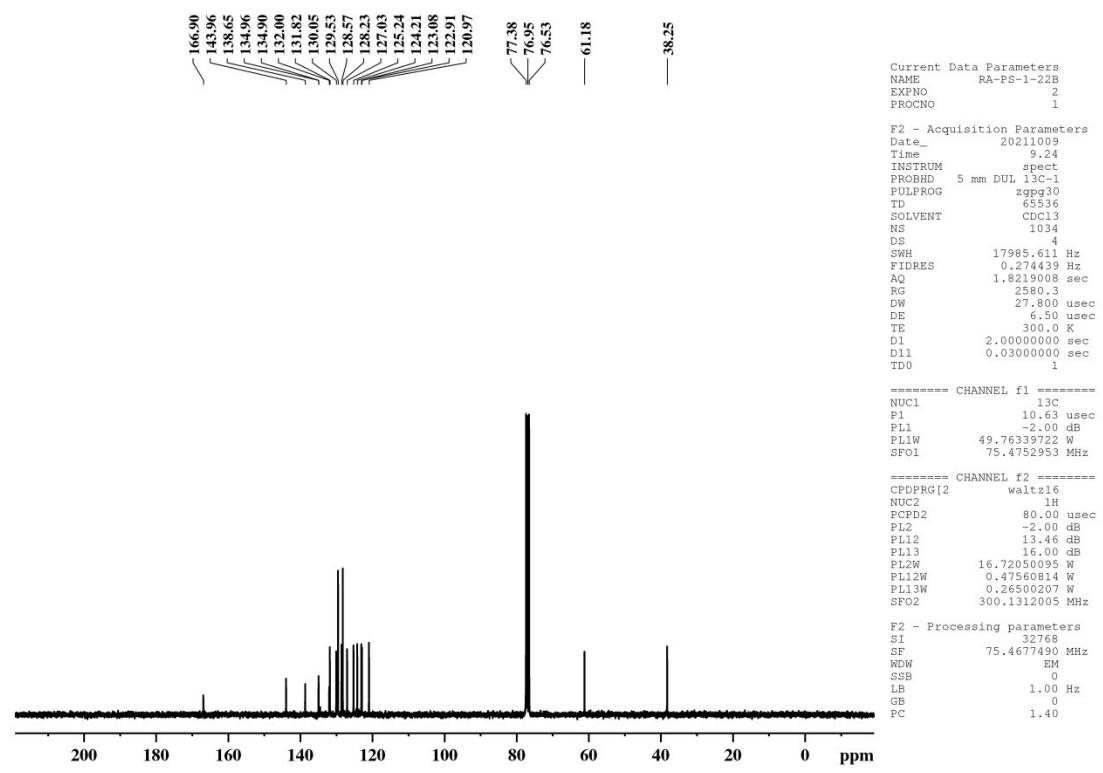

<sup>1</sup>H and <sup>13</sup>C NMR Spectra of compound 2ae

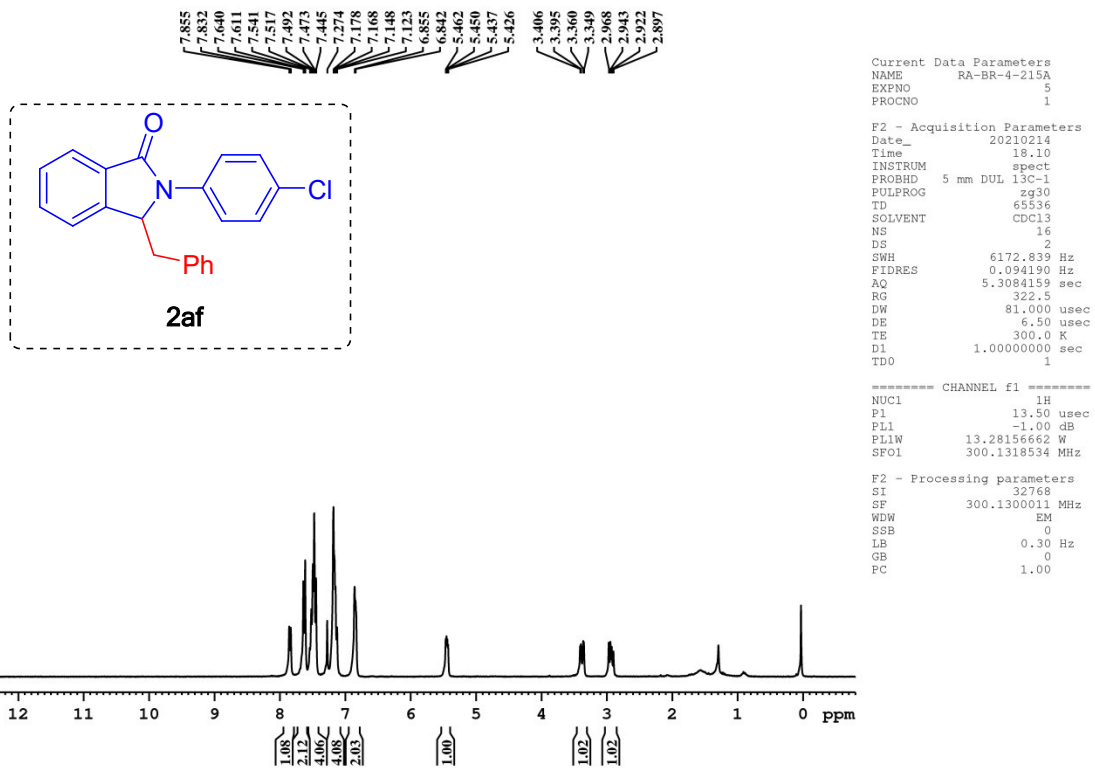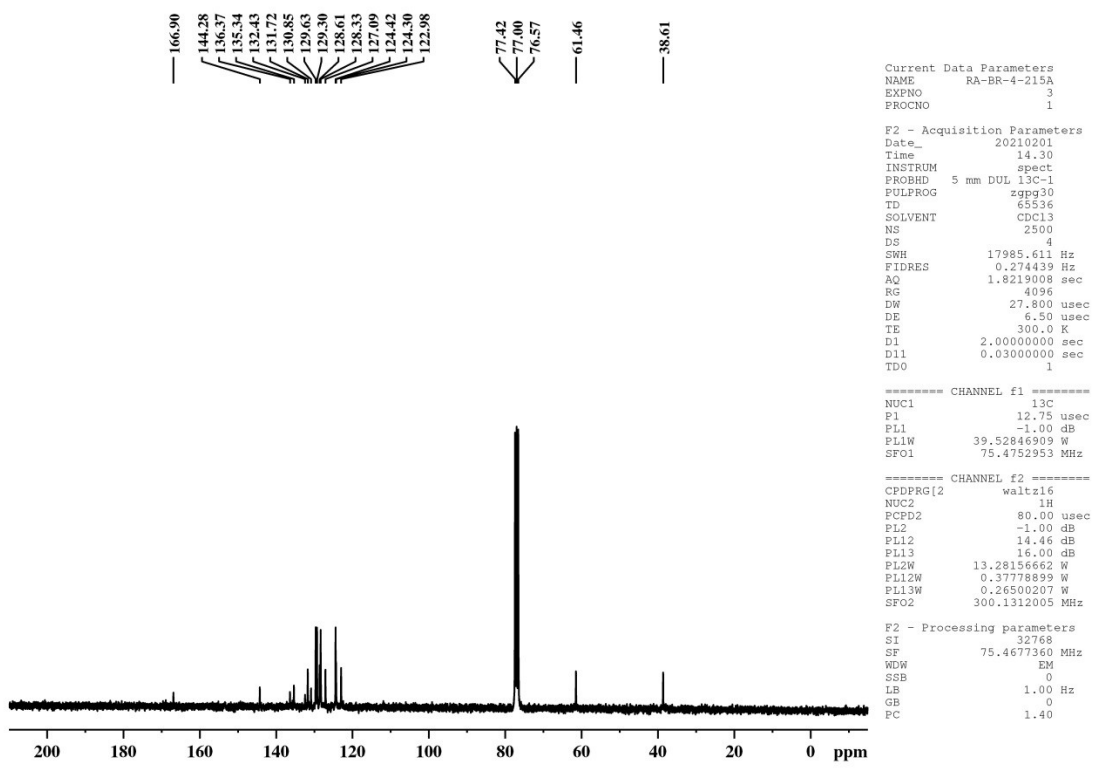

**<sup>1</sup>H and <sup>13</sup>C NMR Spectra of compound 2af**

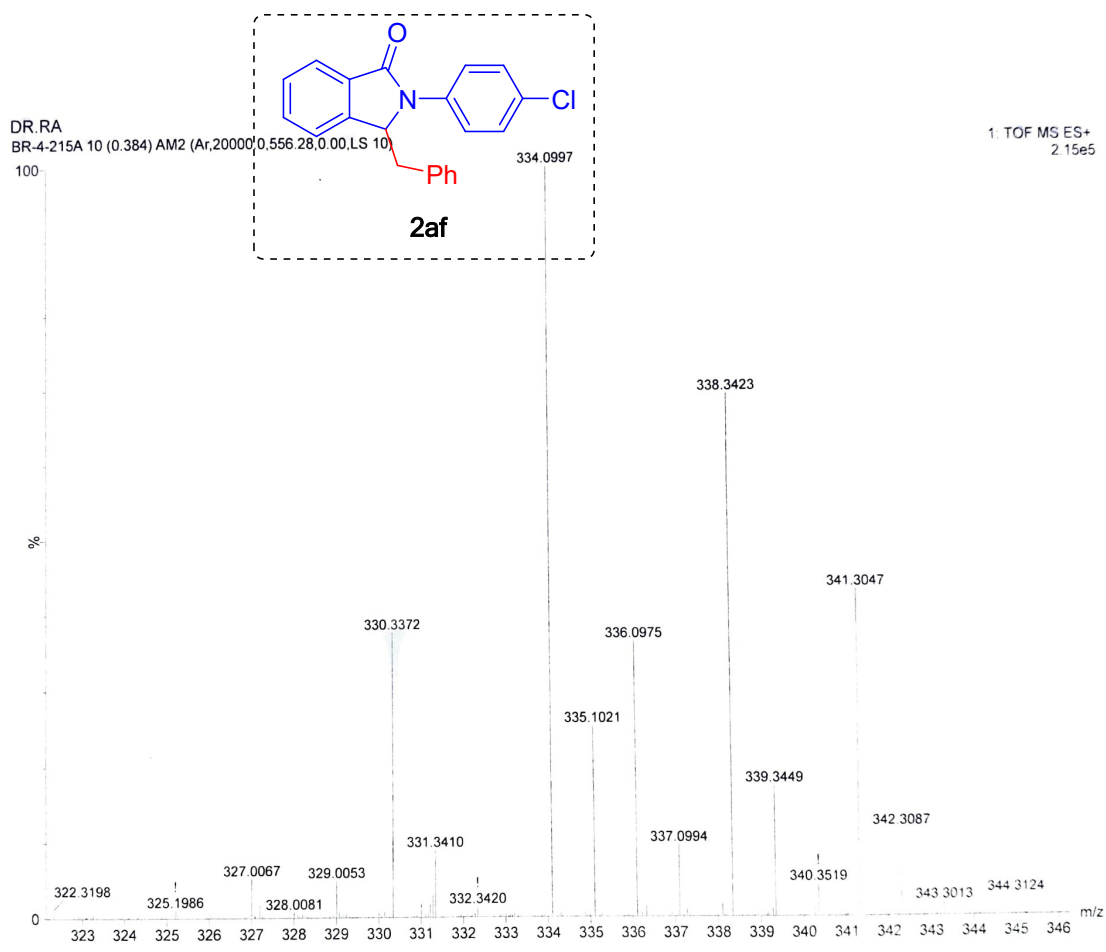

**HRMS Spectrum of  
compound 2af**

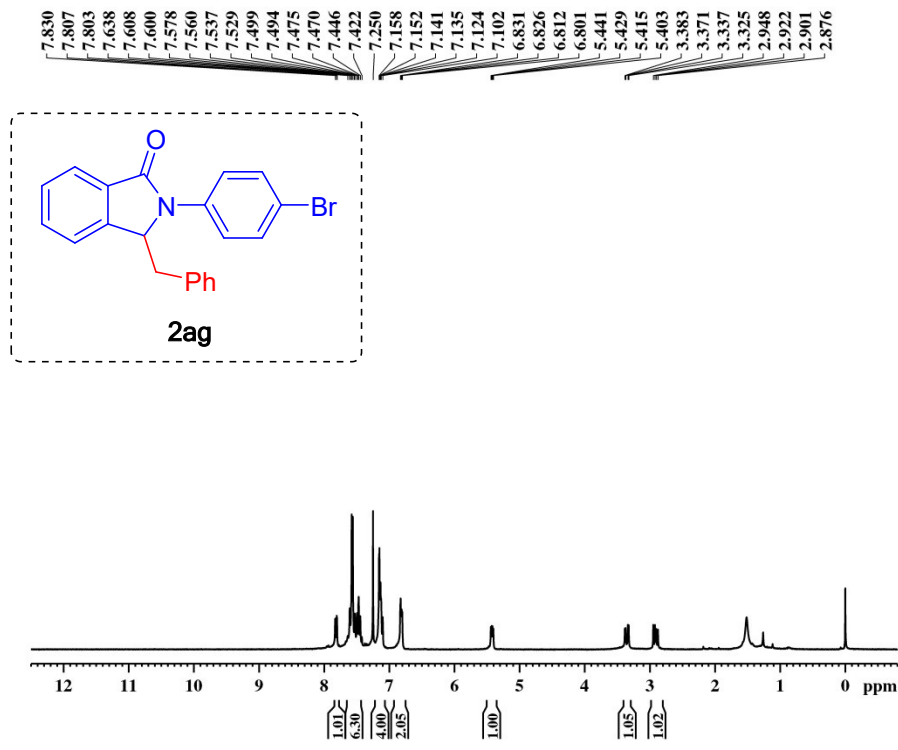

```
Current Data Parameters
NAME RA-PS-1-21B
EXPNO 2
PROCNO 1

F2 - Acquisition Parameters
Date_ 20211010
Time 10.38
INSTRUM spect
PROBHD 5 mm DUL 13C-1
PULPROG zg30
TD 65536
SOLVENT CDCl3
NS 16
DS 2
SWH 6172.839 Hz
FIDRES 0.094190 Hz
AQ 5.3084159 sec
RG 362
DW 81.000 usec
DE 6.50 usec
TE 300.0 K
D1 1.00000000 sec
TD0 1

===== CHANNEL f1 =====
NUC1 1H
P1 14.00 usec
PL1 -2.00 dB
PL1W 16.72050095 W
SFO1 300.1318534 MHz
```

```
F2 - Processing parameters
SI 32768
SF 300.1300098 MHz
WDW EM
SSB 0
LB 0.30 Hz
GB 0
PC 1.00
```

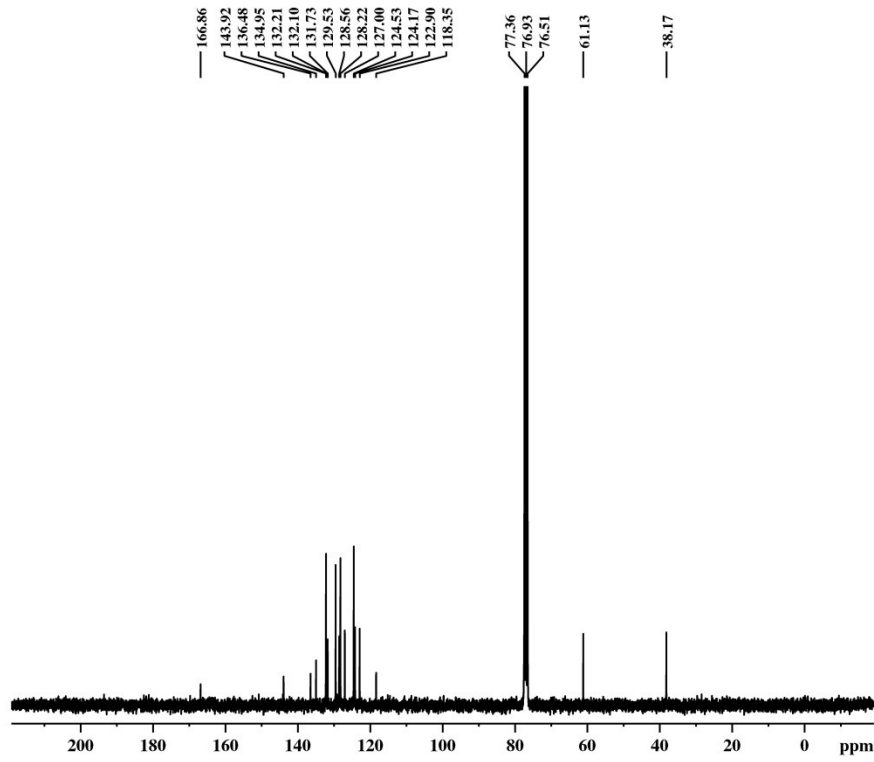

```
Current Data Parameters
NAME RA-PS-1-21B
EXPNO 1
PROCNO 1

F2 - Acquisition Parameters
Date_ 20211010
Time 10.05
INSTRUM spect
PROBHD 5 mm DUL 13C-1
PULPROG zgpg30
TD 65536
SOLVENT CDCl3
NS 2500
DS 4
SWH 17985.611 Hz
FIDRES 0.274439 Hz
AQ 1.8219008 sec
RG 1290.2
DW 27.800 usec
DE 6.50 usec
TE 300.0 K
D1 2.00000000 sec
D11 0.03000000 sec
TD0 1

===== CHANNEL f1 =====
NUC1 13C
P1 10.63 usec
PL1 -2.00 dB
PL1W 49.76339722 W
SFO1 75.4752953 MHz
```

```
===== CHANNEL f2 =====
CPDPRG2 waltz16
NUC2 1H
PCPD2 80.00 usec
PL2 -2.00 dB
PL12 13.46 dB
PL13 16.00 dB
PL2W 16.72050095 W
PL12W 0.47560814 W
PL13W 0.26500207 W
SFO2 300.1312005 MHz

F2 - Processing parameters
SI 32768
SF 75.4677490 MHz
WDW EM
SSB 0
LB 1.00 Hz
GB 0
PC 1.40
```

<sup>1</sup>H and <sup>13</sup>C NMR Spectra of compound 2ag

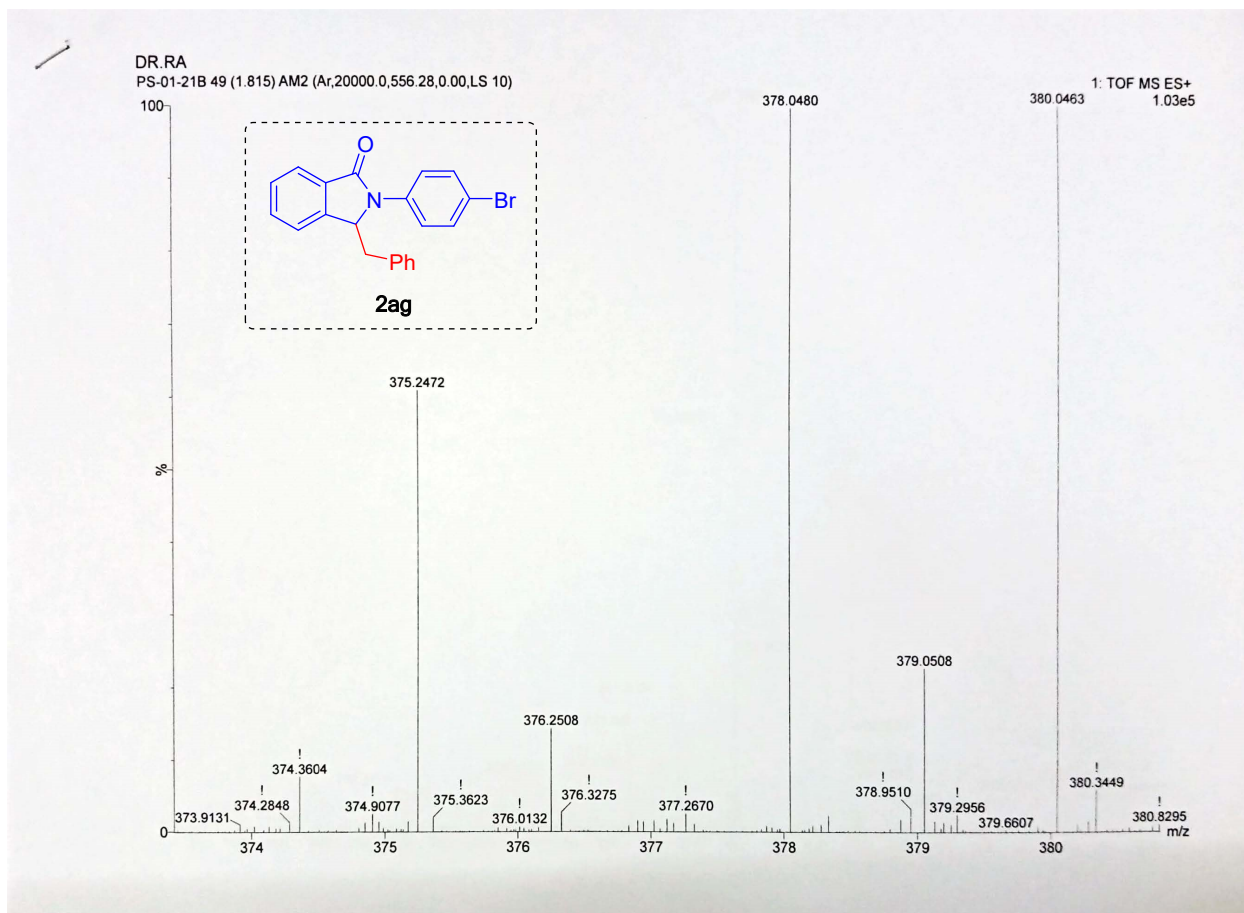

**HRMS Spectrum of compound 2ag**

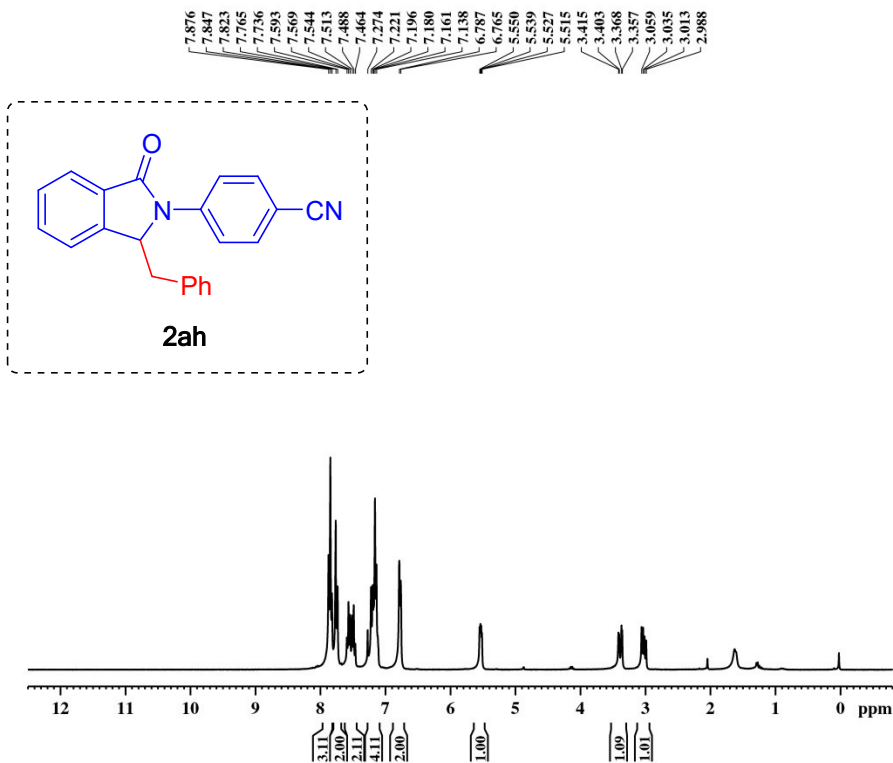

```

Current Data Parameters
NAME      RA-PS-1-5
EXPNO    3
PROCNO   1

F2 - Acquisition Parameters
Date_    20210709
Time     11.28
INSTRUM spect
PROBHD   5 mm DUL 13C-1
PULPROG zg30
TD       65536
SOLVENT  CDCl3
NS       16
DS       2
SWH      6172.839 Hz
FIDRES   0.094190 Hz
AQ       5.3084159 sec
RG       181
DW       81.000 usec
DE       6.50 usec
TE       300.0 K
D1       1.00000000 sec
D10      1
TDO      1

===== CHANNEL f1 =====
NUC1     1H
P1       13.50 usec
PL1     -1.00 dB
PL1W    13.28156662 W
SF01    300.1318534 MHz

F2 - Processing parameters
SI       32768
SF       300.1300011 MHz
WDW      EM
SSB      0
LB       0.30 Hz
GB       0
PC       1.00

```

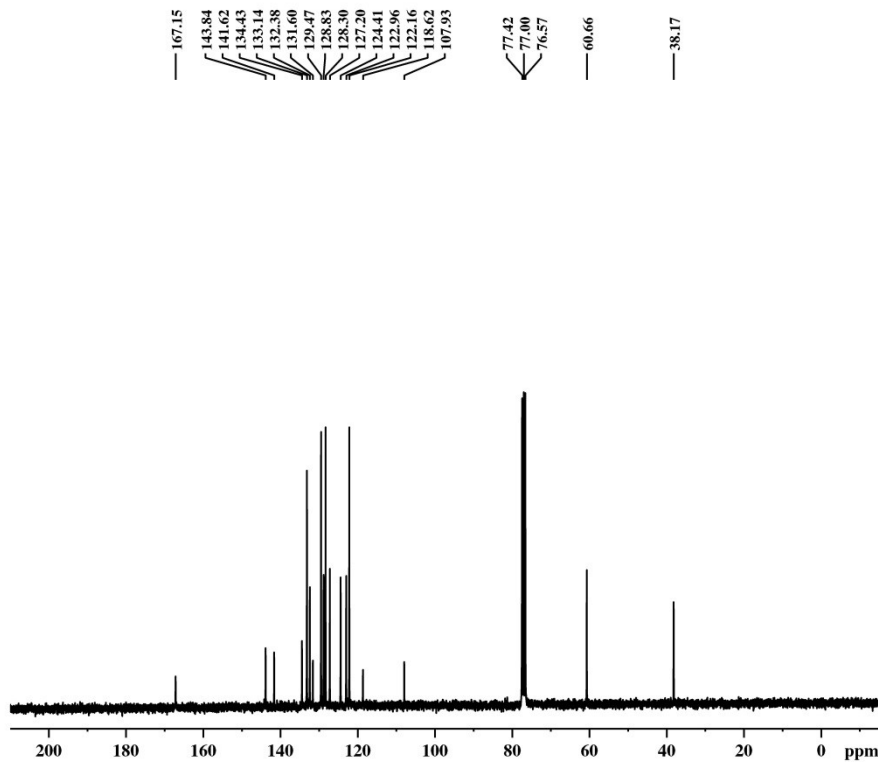

```

Current Data Parameters
NAME      RA-PS-1-5
EXPNO    2
PROCNO   1

F2 - Acquisition Parameters
Date_    20210709
Time     10.59
INSTRUM spect
PROBHD   5 mm DUL 13C-1
PULPROG zgpg30
TD       65536
SOLVENT  CDCl3
NS       952
DS       4
SWH      17985.611 Hz
FIDRES   0.274439 Hz
AQ       1.8219008 sec
RG       2298.8
DW       27.800 usec
DE       6.50 usec
TE       300.0 K
D1       2.00000000 sec
D11     0.03000000 sec
D10      1
TDO      1

===== CHANNEL f1 =====
NUC1     13C
P1       12.75 usec
PL1     -1.00 dB
PL1W    39.52846909 W
SF01    75.4752953 MHz

===== CHANNEL f2 =====
CPDPRG[2] waltz16
NUC2     1H
PCPD2   80.00 usec
PL2     -1.00 dB
PL12    14.46 dB
PL13    16.00 dB
PL2W    13.28156662 W
PL12W   0.37778899 W
PL13W   0.26500207 W
SF02    300.1312005 MHz

F2 - Processing parameters
SI       32768
SF       75.4677477 MHz
WDW      EM
SSB      0
LB       1.00 Hz
GB       0
PC       1.40

```

**<sup>1</sup>H and <sup>13</sup>C NMR Spectra of compound 2ah**



DR.RA  
RA-PS-01-05 7 (0.274) AM2 (Ar,20000.0,0.00,0.00,LS 10)

1. TOF MS ES+  
2.26e5

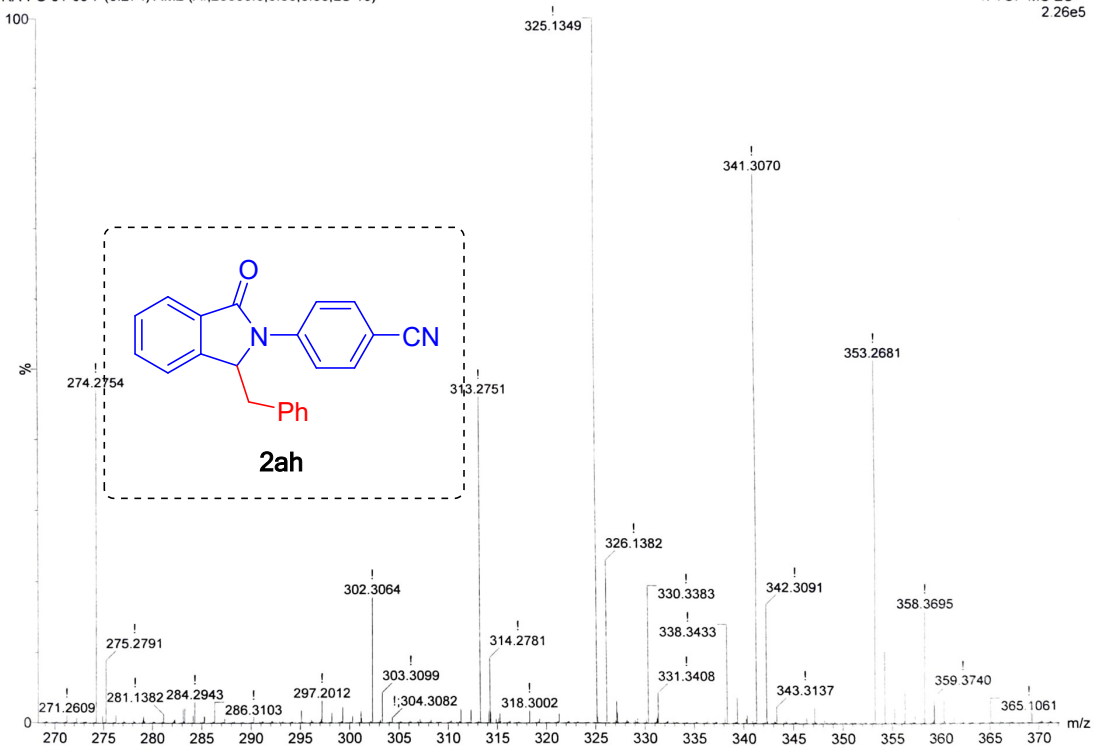

**HRMS Spectrum of compound 2ah**

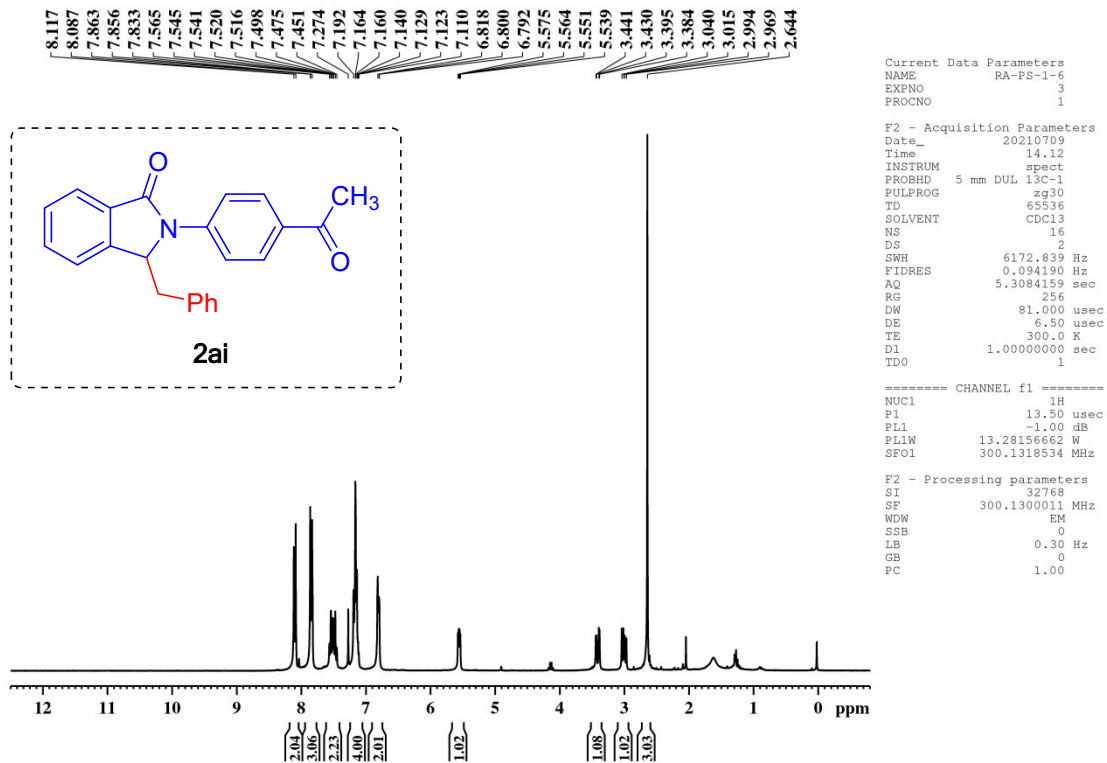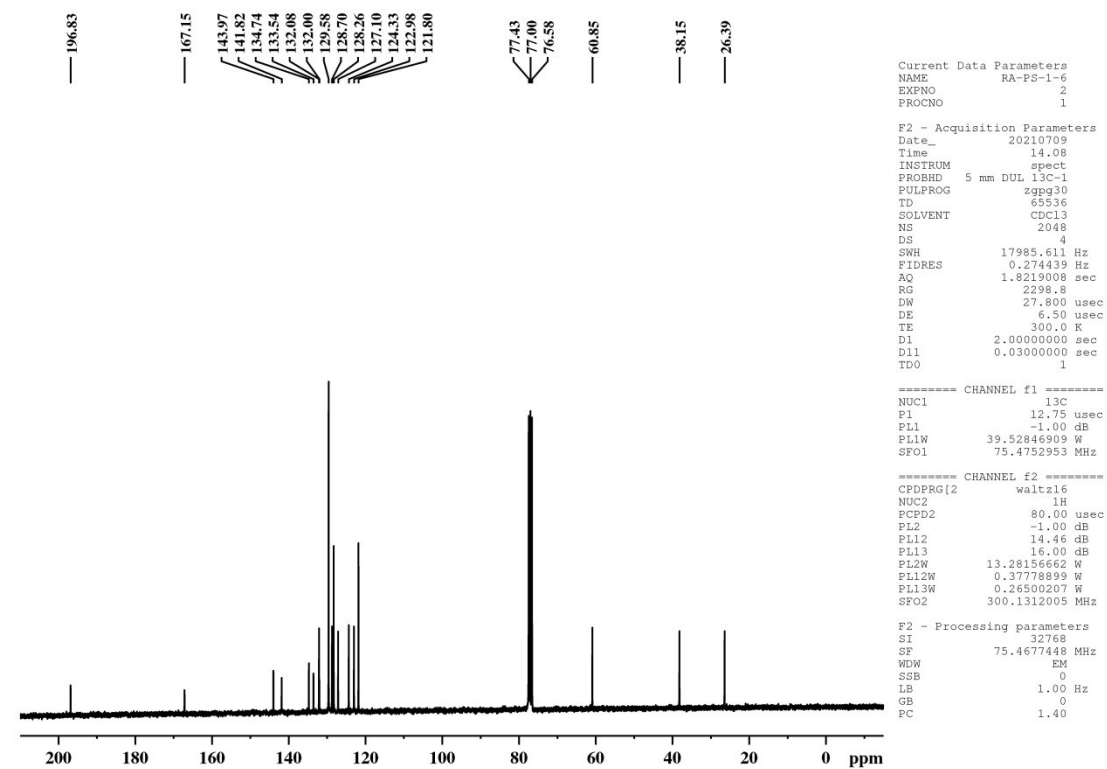

<sup>1</sup>H and <sup>13</sup>C NMR Spectra of compound 2ai

DR.RA  
RA-PS-01-06 35 (1.301) AM2 (Ar,20000.0,0.00,0.00,LS 10)

1: TOF MS ES+  
3.78e5

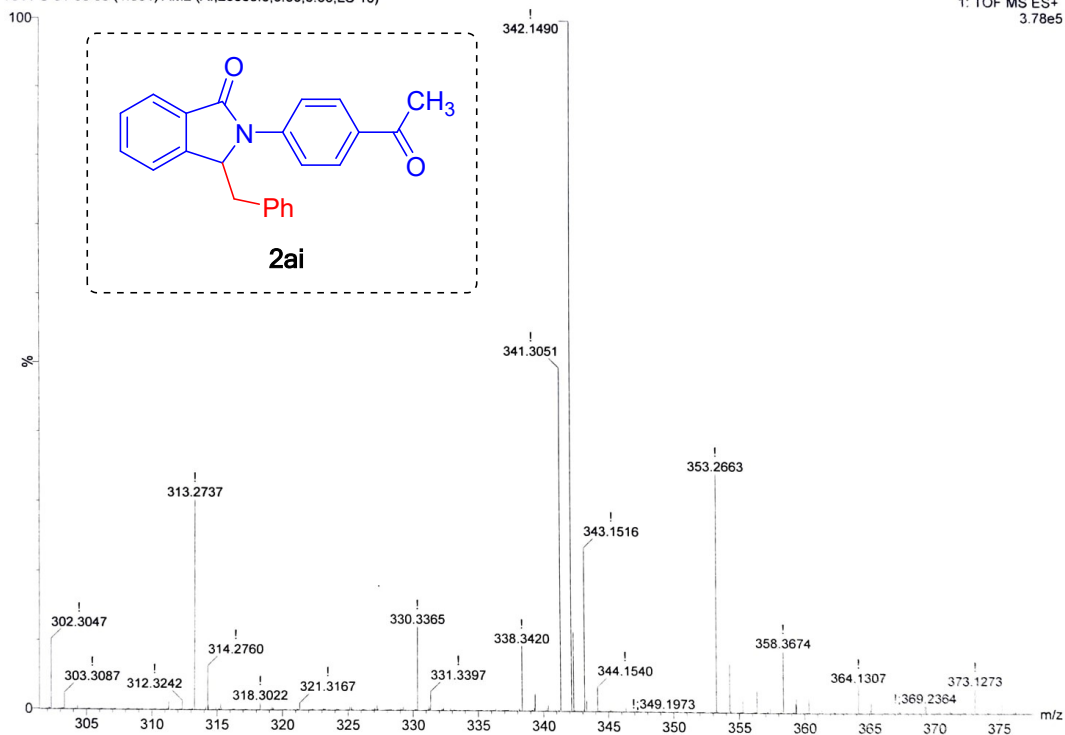

**HRMS Spectrum of compound 2ai**

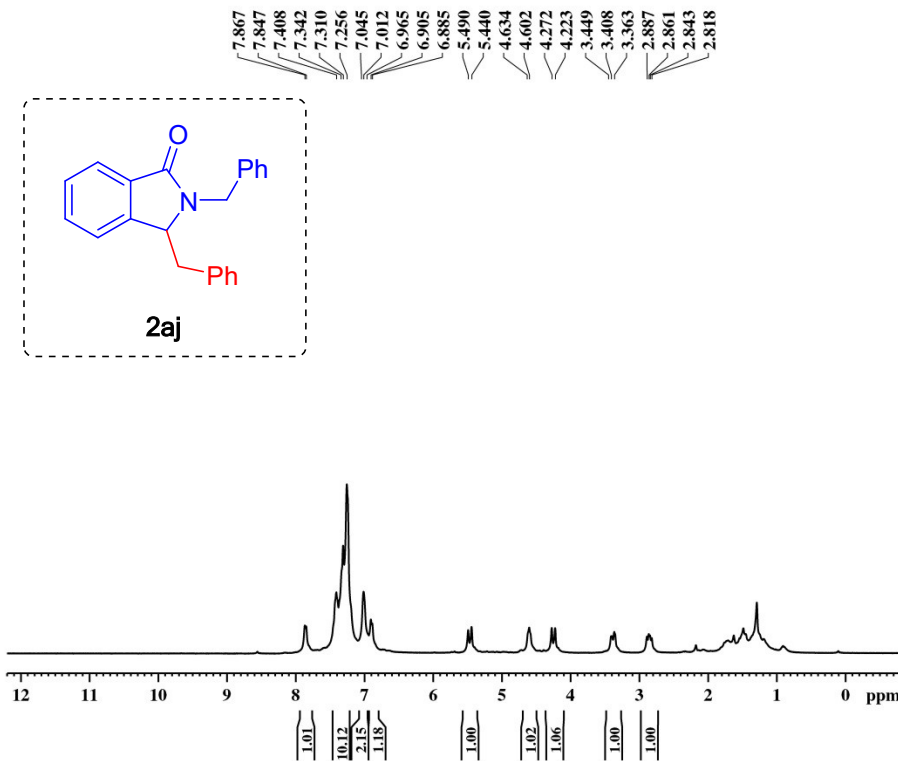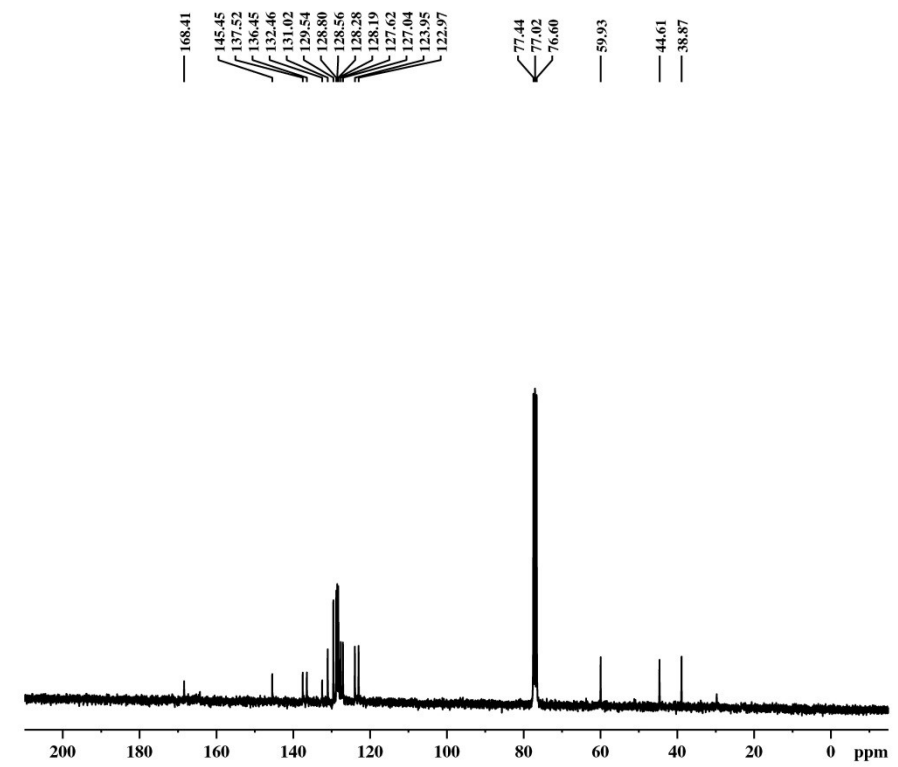

```

Current Data Parameters
NAME RA-BR-4-213A
EXPNO 1
PROCNO 1

F2 - Acquisition Parameters
Date_ 20210125
Time 21.28
INSTRUM spect
PROBHD 5 mm DUL 13C-1
PULPROG zg30
TD 65536
SOLVENT CDCl3
NS 16
DS 2
SWH 6172.839 Hz
FIDRES 0.094190 Hz
AQ 5.3084159 sec
RG 128
DW 81.000 usec
DE 6.50 usec
TE 300.0 K
D1 1.00000000 sec
TDO 1
  
```

```

===== CHANNEL f1 =====
NUC1 1H
P1 13.50 usec
PL1 -1.00 dB
PL1W 13.28156662 W
SFO1 300.1318534 MHz

F2 - Processing parameters
SI 32768
SF 300.1300011 MHz
WDW EM
SSB 0
LB 0.30 Hz
GB 0
PC 1.00
  
```

```

Current Data Parameters
NAME RA-BR-4-213A
EXPNO 2
PROCNO 1

F2 - Acquisition Parameters
Date_ 20210125
Time 23.12
INSTRUM spect
PROBHD 5 mm DUL 13C-1
PULPROG zgpg30
TD 65536
SOLVENT CDCl3
NS 1577
DS 4
SWH 17985.611 Hz
FIDRES 0.274439 Hz
AQ 1.8219008 sec
RG 2298.8
DW 27.000 usec
DE 6.50 usec
TE 300.0 K
D1 2.00000000 sec
D11 0.03000000 sec
TDO 1
  
```

```

===== CHANNEL f1 =====
NUC1 13C
P1 12.75 usec
PL1 -1.00 dB
PL1W 39.52846909 W
SFO1 75.4752953 MHz

===== CHANNEL f2 =====
CPDPRG2 waltz16
NUC2 1H
PCPD2 80.00 usec
PL2 -1.00 dB
PL12 14.46 dB
PL13 16.00 dB
PL2W 13.28156662 W
PL12W 0.37778999 W
PL13W 0.26500207 W
SFO2 300.1312005 MHz

F2 - Processing parameters
SI 32768
SF 75.4677354 MHz
WDW EM
SSB 0
LB 1.00 Hz
GB 0
PC 1.40
  
```

**<sup>1</sup>H and <sup>13</sup>C NMR Spectra of compound 2aj**

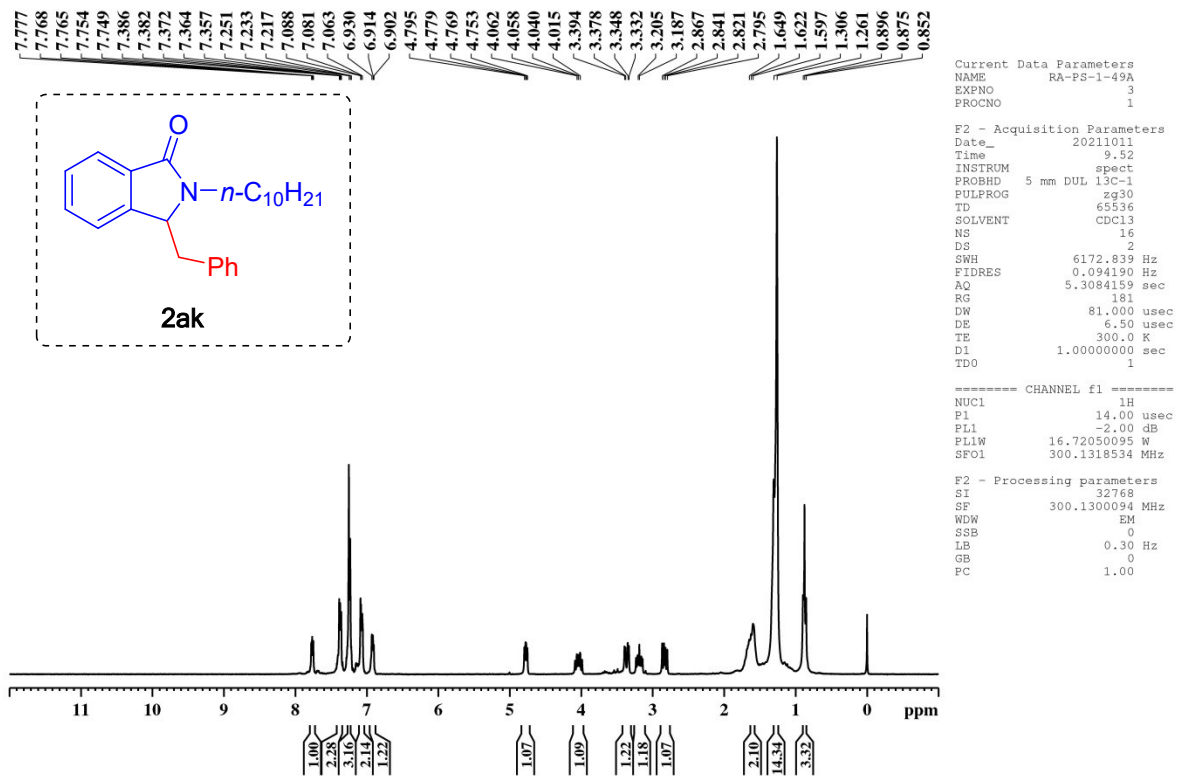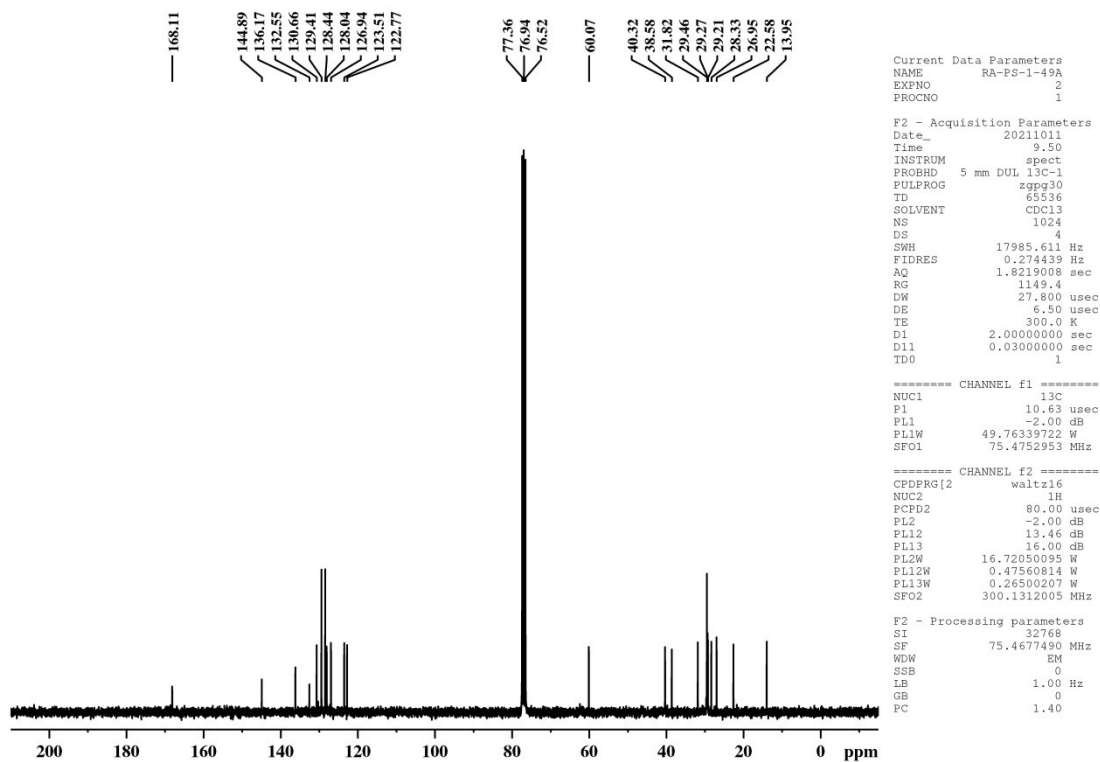

**<sup>1</sup>H and <sup>13</sup>C NMR Spectra of compound 2ak**

DR RA  
PS-1-49A 15 (0.567) AM2 (Ar,20000.0,556.28,0.00,LS 10)

1: TOF MS ES+  
5.87e5

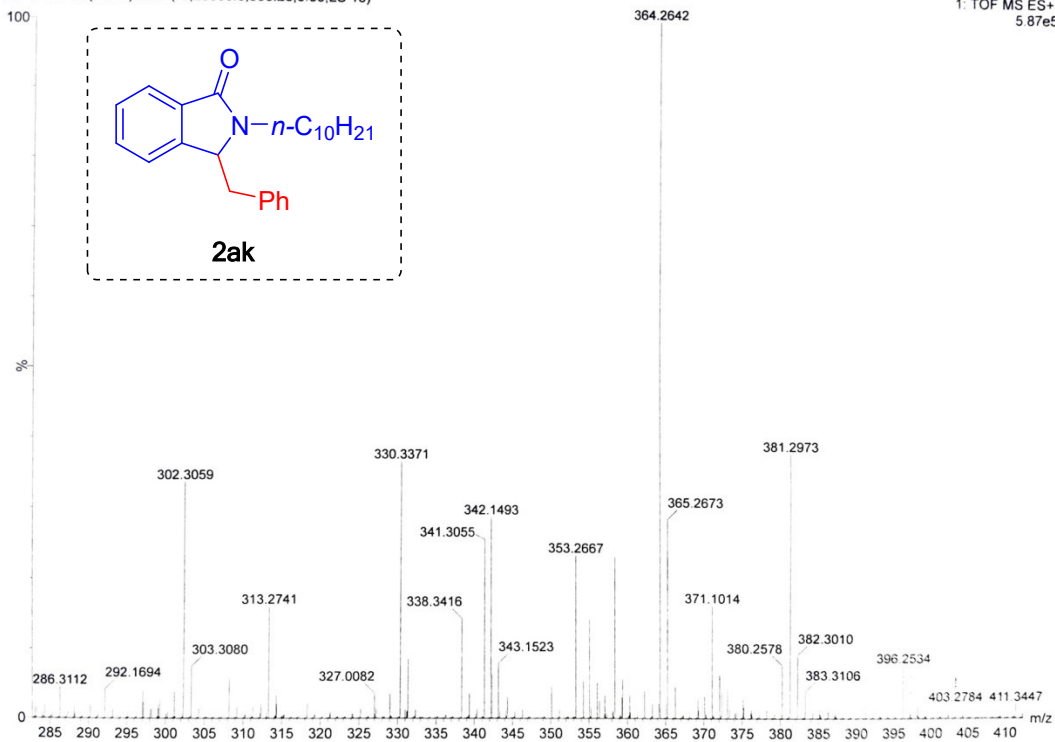

**HRMS Spectrum of compound 2ak**

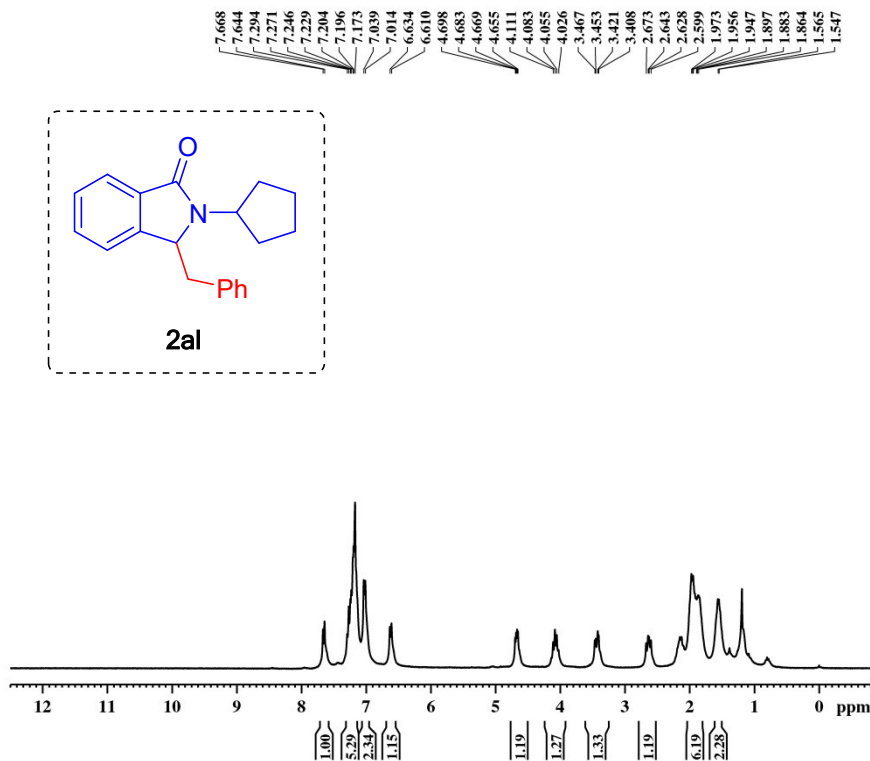

```

Current Data Parameters
NAME      RA-BR-4-211
EXPNO    3
PROCNO   1

F2 - Acquisition Parameters
Date_    20210124
Time     9.04
INSTRUM  spect
PROBHD   5 mm DUL 13C-1
PULPROG  zg30
TD       65536
SOLVENT  CDCl3
NS       16
DS       2
SWH      6172.839 Hz
FIDRES   0.094190 Hz
AQ       5.3084159 sec
RG       203.2
DW       81.0000 usec
DE       6.00 usec
TE       300.0 K
D1       1.00000000 sec
TDO      1

----- CHANNEL f1 -----
NUC1     1H
P1       13.50 usec
PL1      -1.00 dB
SFO1     300.1318534 MHz

F2 - Processing parameters
SI       32768
SF       300.1300328 MHz
WDW      EM
SSB      0
LB       0.30 Hz
GB       0
PC       1.00
  
```

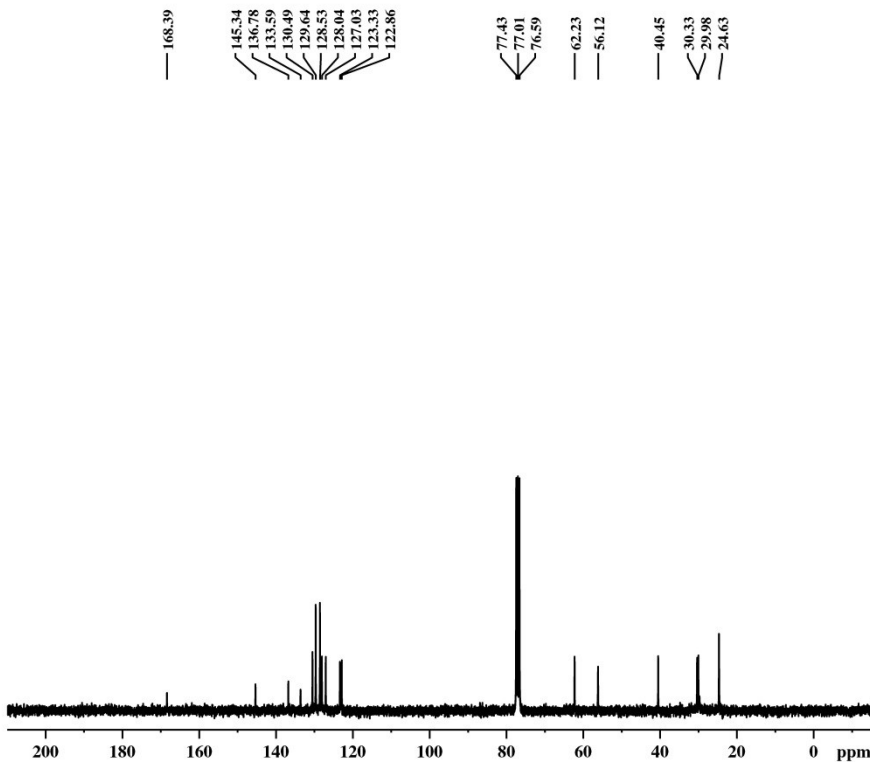

```

Current Data Parameters
NAME      RA-BR-4-211
EXPNO    2
PROCNO   1

F2 - Acquisition Parameters
Date_    20210124
Time     10.48
INSTRUM  spect
PROBHD   5 mm DUL 13C-1
PULPROG  zgpg30
TD       65536
SOLVENT  CDCl3
NS       1024
DS       4
SWH      17985.611 Hz
FIDRES   0.274439 Hz
AQ       1.8219008 sec
RG       8192
DW       27.8000 usec
DE       6.00 usec
TE       300.0 K
D1       2.00000000 sec
d11      0.03000000 sec
DELTA    1.89999998 sec
TDO      1

----- CHANNEL f1 -----
NUC1     13C
P1       11.00 usec
PL1      -3.00 dB
SFO1     75.4752953 MHz

----- CHANNEL f2 -----
CPDPRG2  waltz16
NUC2     1H
PCPD2    80.00 usec
PL2      -1.00 dB
PL12     14.46 dB
PL13     16.00 dB
SFO2     300.1312005 MHz

F2 - Processing parameters
SI       32768
SF       75.4677353 MHz
WDW      EM
SSB      0
LB       1.00 Hz
GB       0
PC       1.40
  
```

**<sup>1</sup>H and <sup>13</sup>C NMR Spectra of compound 2al**

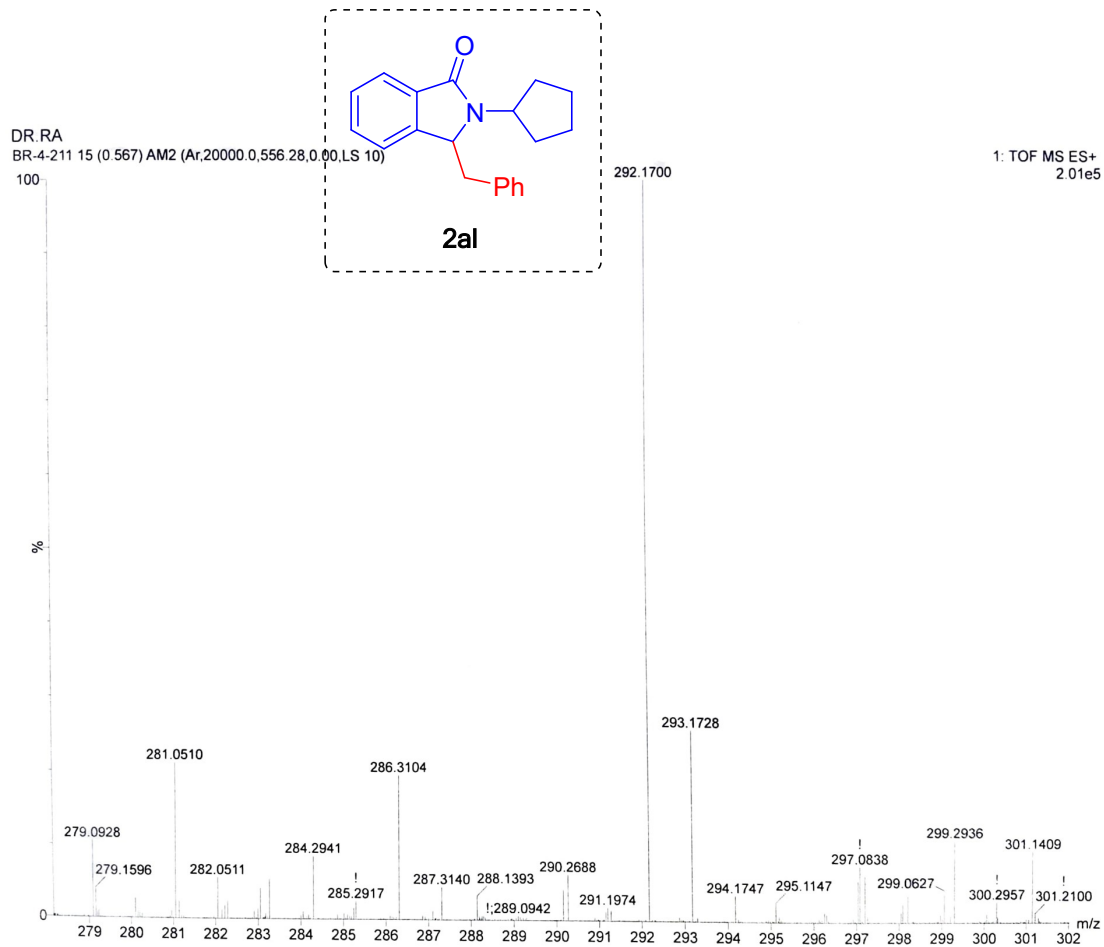

**HRMS Spectrum of  
compound 2al**



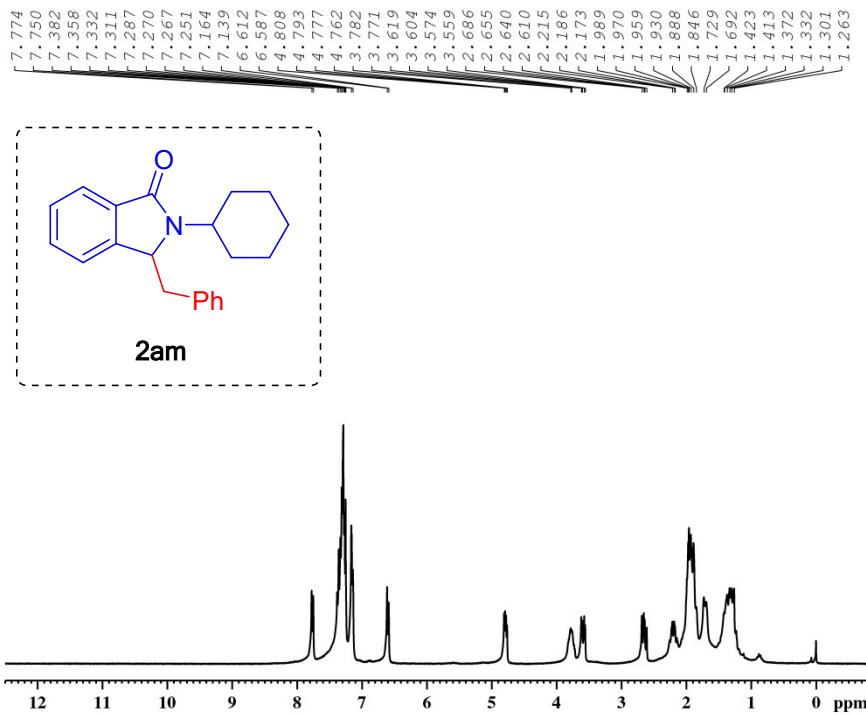

```
Current Data Parameters
NAME      RA-PS-1-37A
EXPNO    4
PROCNO   1

F2 - Acquisition Parameters
Date_    20211010
Time     18.37
INSTRUM  spect
PROBHD   5 mm DUL 13C-1
PULPROG  zg30
TD       65536
SOLVENT  CDCl3
NS       16
DS       2
SWH      6172.839 Hz
FIDRES   0.094190 Hz
AQ       5.3084159 sec
RG       181
DW       81.000 usec
DE       6.50 usec
TE       300.0 K
D1       1.00000000 sec
TD0      1

===== CHANNEL f1 =====
NUC1     1H
P1       14.00 usec
PL1      -2.00 dB
PL1W    16.72050095 W
SFO1    300.1318534 MHz

F2 - Processing parameters
SI       32768
SF       300.1300090 MHz
WDW      EM
SSB      0
LB       0.30 Hz
GB       0
PC       1.00
```

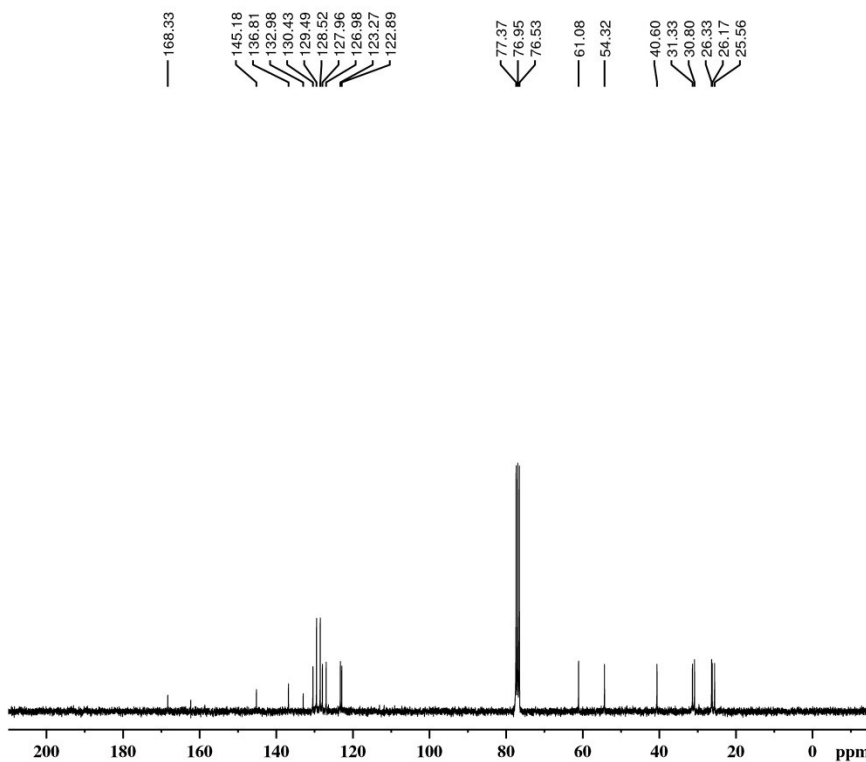

```
Current Data Parameters
NAME      RA-PS-1-37A
EXPNO    3
PROCNO   1

F2 - Acquisition Parameters
Date_    20211010
Time     18.31
INSTRUM  spect
PROBHD   5 mm DUL 13C-1
PULPROG  zgpg30
TD       65536
SOLVENT  CDCl3
NS       1028
DS       4
SWH      17985.611 Hz
FIDRES   0.274439 Hz
AQ       1.8219008 sec
RG       1149.4
DW       27.800 usec
DE       6.50 usec
TE       300.0 K
D1       2.00000000 sec
D11      0.03000000 sec
TD0      1

===== CHANNEL f1 =====
NUC1     13C
P1       10.63 usec
PL1      -2.00 dB
PL1W    49.76339722 W
SFO1    75.4752953 MHz

===== CHANNEL f2 =====
CPDPRG[2] waltz16
NUC2     1H
PCPD2    80.00 usec
PL2      -2.00 dB
PL12     13.46 dB
PL13     16.00 dB
PL2W    16.72050095 W
PL12W   0.47560814 W
PL13W   0.26500207 W
SFO2    300.1312005 MHz

F2 - Processing parameters
SI       32768
SF       75.4677490 MHz
WDW      EM
SSB      0
LB       1.00 Hz
GB       0
PC       1.40
```

**<sup>1</sup>H and <sup>13</sup>C NMR Spectra of compound 2am**

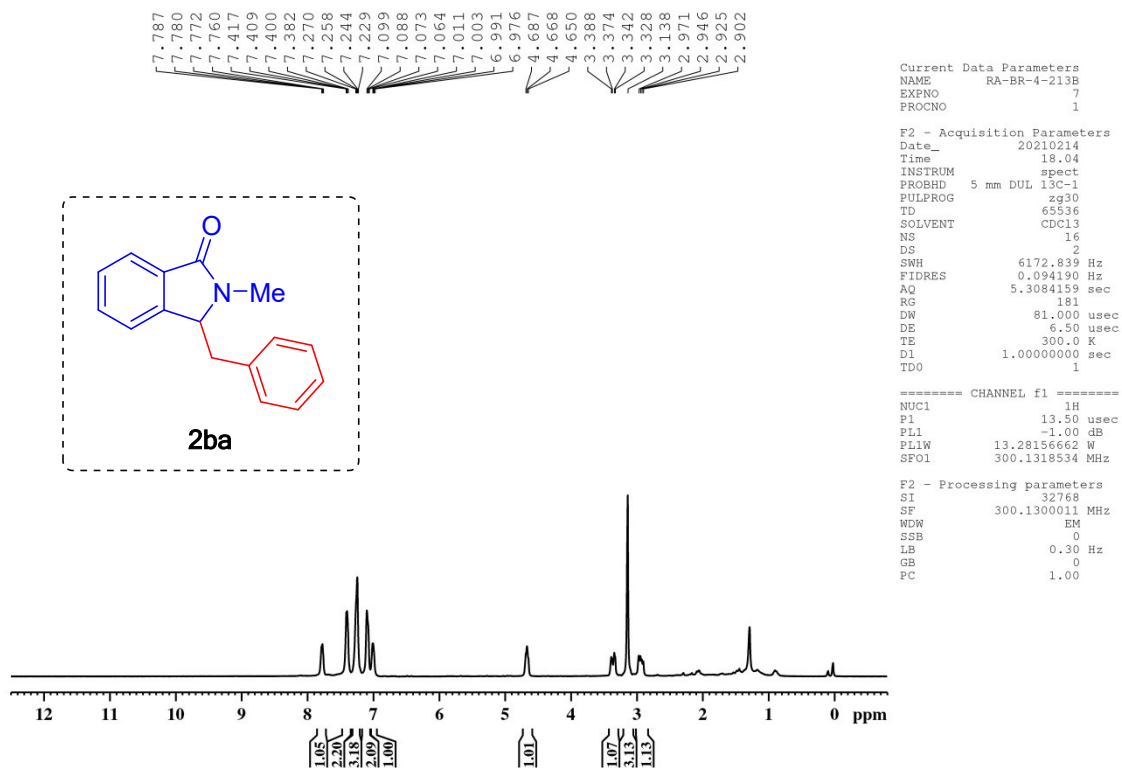

```

Current Data Parameters
NAME      RA-BR-4-213B
EXPNO    7
PROCNO   1

F2 - Acquisition Parameters
Date_    20210214
Time     18.04
INSTRUM  spect
PROBHD   5 mm DUL 13C-1
PULPROG  zg30
TD       65536
SOLVENT  CDCl3
NS       16
DS       2
SWH      6172.839 Hz
FIDRES   0.094190 Hz
AQ       5.3084159 sec
RG       181
DW       81.000 usec
DE       6.50 usec
TE       300.0 K
D1       1.00000000 sec
TD0      1

===== CHANNEL f1 =====
NUC1     1H
P1       13.50 usec
PL1      -1.00 dB
PL1W     13.28156662 W
SFO1     300.1318534 MHz

F2 - Processing parameters
SI       32768
SF       300.1300011 MHz
WDW      EM
SSB      0
LB       0.30 Hz
GB       0
PC       1.00

```

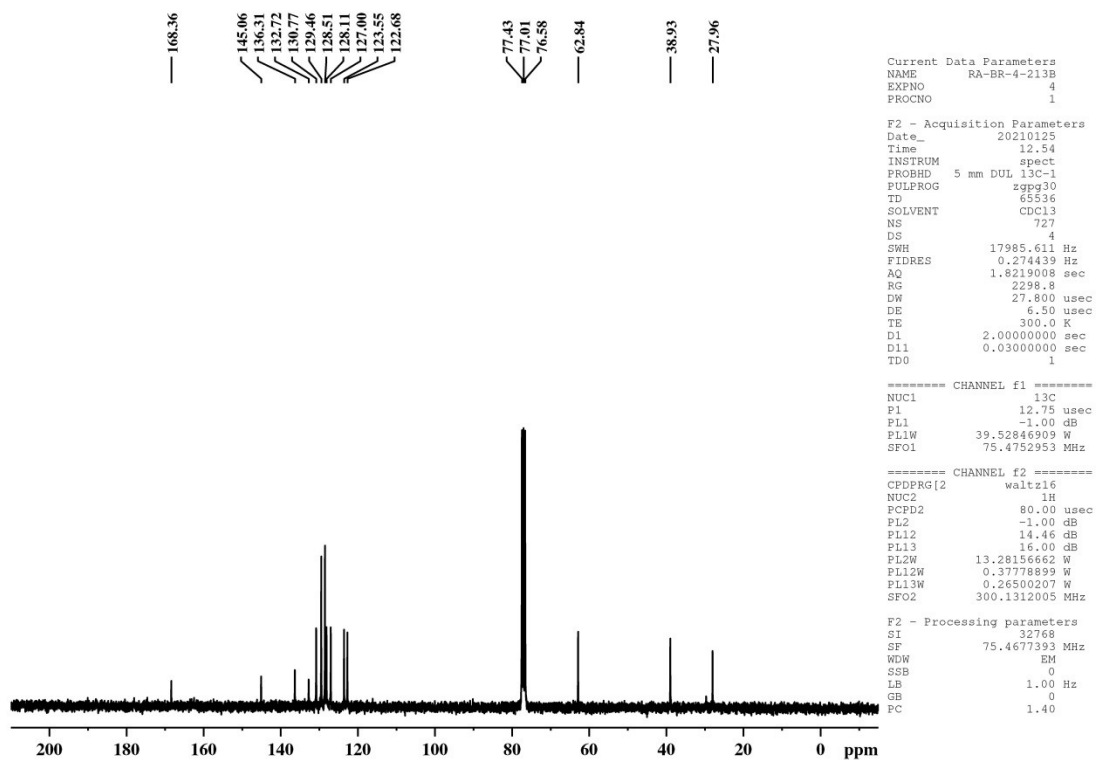

```

Current Data Parameters
NAME      RA-BR-4-213B
EXPNO    4
PROCNO   1

F2 - Acquisition Parameters
Date_    20210125
Time     12.54
INSTRUM  spect
PROBHD   5 mm DUL 13C-1
PULPROG  zgpg30
TD       65536
SOLVENT  CDCl3
NS       727
DS       4
SWH      17985.611 Hz
FIDRES   0.274439 Hz
AQ       1.8219008 sec
RG       2298.8
DW       27.800 usec
DE       6.50 usec
TE       300.0 K
D1       2.00000000 sec
D11      0.03000000 sec
TD0      1

===== CHANNEL f1 =====
NUC1     13C
P1       12.75 usec
PL1      -1.00 dB
PL1W     39.52846909 W
SFO1     75.4752953 MHz

===== CHANNEL f2 =====
CPDPRG2  waltz16
NUC2     1H
PCPD2    80.00 usec
PL2      -1.00 dB
PL12     14.46 dB
PL13     16.00 dB
PL1W     13.28156662 W
PL12W    0.37778899 W
PL13W    0.26500207 W
SFO2     300.1312005 MHz

F2 - Processing parameters
SI       32768
SF       75.4677393 MHz
WDW      EM
SSB      0
LB       1.00 Hz
GB       0
PC       1.40

```

<sup>1</sup>H and <sup>13</sup>C NMR Spectra of compound 2ba

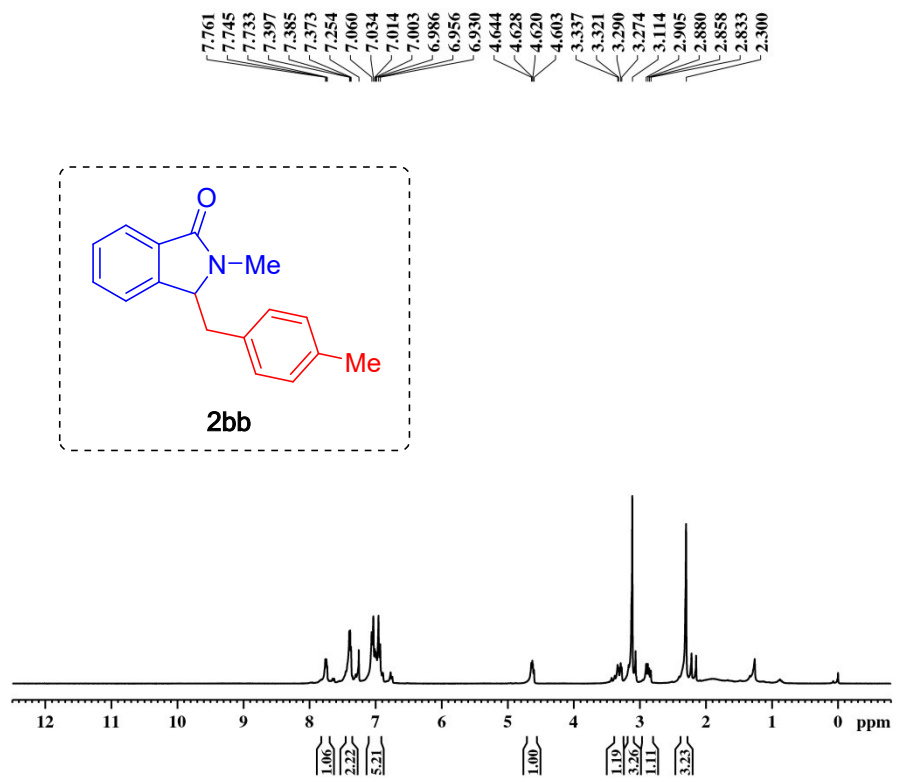

```

Current Data Parameters
NAME RA-PS-1-45
EXPNO 9
PROCNO 1

F2 - Acquisition Parameters
Date_ 20211008
Time 19.38
INSTRUM spect
PROBHD 5 mm DUL 13C-1
PULPROG zgpg30
TD 65536
SOLVENT CDCl3
NS 16
DS 2
SWH 6172.839 Hz
FIDRES 0.094190 Hz
AQ 5.3084159 sec
RG 161.3
DW 81.000 usec
DE 6.50 usec
TE 300.0 K
D1 1.00000000 sec
TD0 1

===== CHANNEL f1 =====
NUC1 1H
P1 14.00 usec
PL1 -2.00 dB
PL1W 16.72050095 W
SF01 300.1318534 MHz
  
```

```

F2 - Processing parameters
SI 32768
SF 300.1300083 MHz
WDW EM
SSB 0
LB 0.30 Hz
GB 0
PC 1.00
  
```

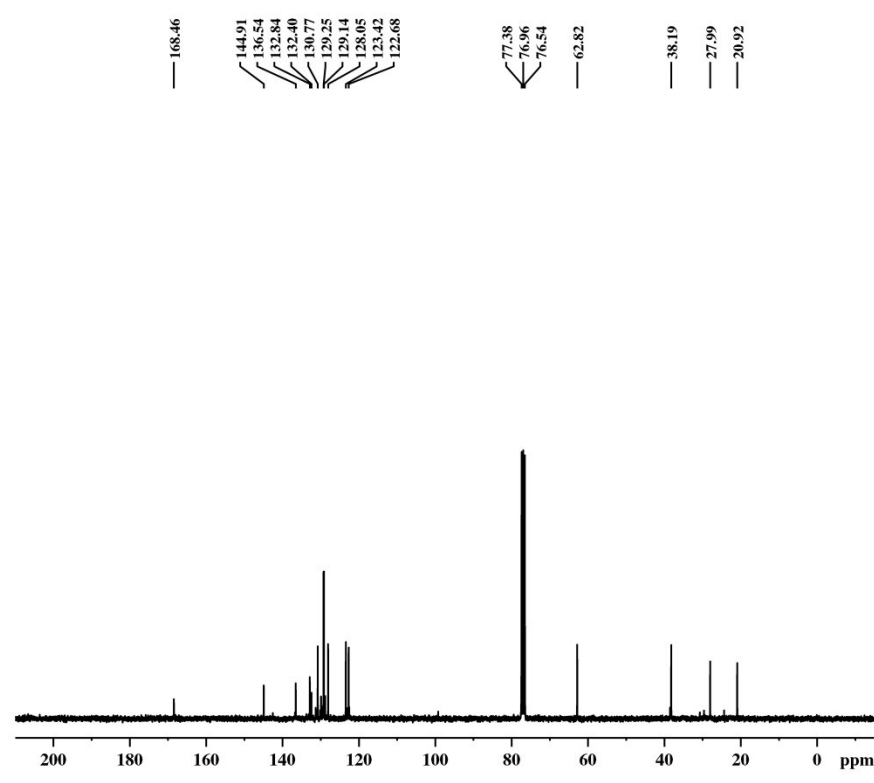

```

Current Data Parameters
NAME RA-PS-1-45
EXPNO 10
PROCNO 1

F2 - Acquisition Parameters
Date_ 20211008
Time 20.45
INSTRUM spect
PROBHD 5 mm DUL 13C-1
PULPROG zgpg30
TD 65536
SOLVENT CDCl3
NS 1024
DS 4
SWH 17985.611 Hz
FIDRES 0.274439 Hz
AQ 1.8219008 sec
RG 2048
DW 27.800 usec
DE 6.50 usec
TE 300.0 K
D1 2.00000000 sec
D11 0.03000000 sec
TD0 1

===== CHANNEL f1 =====
NUC1 13C
P1 10.63 usec
PL1 -2.00 dB
PL1W 49.76339722 W
SF01 75.4752953 MHz
  
```

```

===== CHANNEL f2 =====
CPDPRG2 waltz16
NUC2 1H
PCPD2 80.00 usec
PL2 -2.00 dB
PL12 13.46 dB
PL13 16.00 dB
PL2W 16.72050095 W
PL12W 0.47560814 W
PL13W 0.26500207 W
SF02 300.1312005 MHz

F2 - Processing parameters
SI 32768
SF 75.4677490 MHz
WDW EM
SSB 0
LB 1.00 Hz
GB 0
PC 1.40
  
```

<sup>1</sup>H and <sup>13</sup>C NMR Spectra of compound 2bb

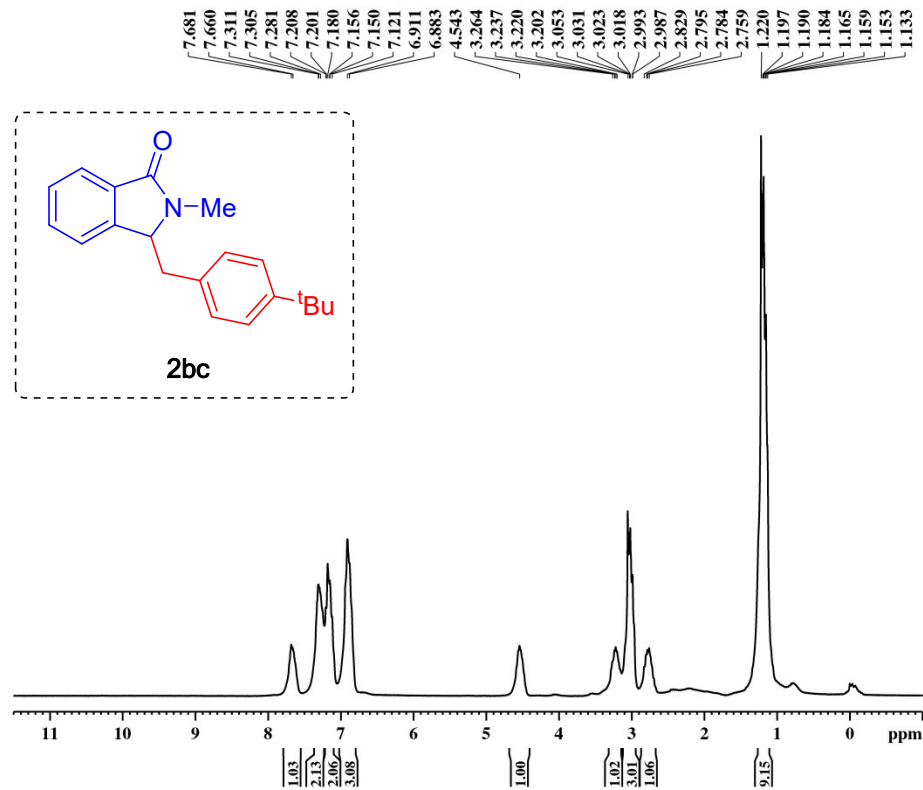

```

Current Data Parameters
NAME      RA-PS-2-231A
EXPNO    3
PROCNO   1

F2 - Acquisition Parameters
Date_    20230131
Time     15.28
INSTRUM  spect
PROBHD   5 mm DUL 13C-1
PULPROG  zgpg30
TD       65536
SOLVENT  CDCl3
NS       16
DS       2
SWH      6009.615 Hz
FIDRES   0.091699 Hz
AQ       5.4525952 sec
RG       101
DW       83.200 usec
DE       6.50 usec
TE       298.0 K
D1       1.00000000 sec
TD0      1

===== CHANNEL f1 =====
SFO1    300.1318534 MHz
NUC1    1H
P1      12.00 usec
PLW1    12.00000000 W

F2 - Processing parameters
SI      65536
SF      300.1300394 MHz
WDW     EM
SSB     0
LB      0.30 Hz
GB      0
PC      1.00
  
```

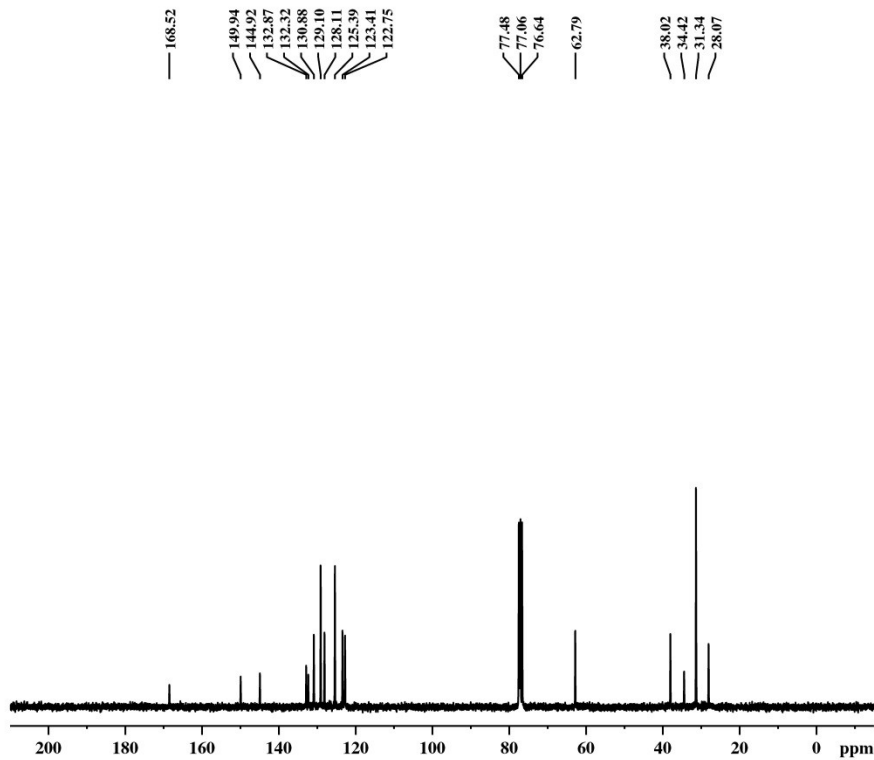

```

Current Data Parameters
NAME      RA-PS-2-231A
EXPNO    2
PROCNO   1

F2 - Acquisition Parameters
Date_    20230131
Time     15.26
INSTRUM  spect
PROBHD   5 mm DUL 13C-1
PULPROG  zgpg30
TD       65536
SOLVENT  CDCl3
NS       1024
DS       4
SWH      18028.846 Hz
FIDRES   0.275098 Hz
AQ       1.8175317 sec
RG       1150
DW       27.733 usec
DE       6.50 usec
TE       300.0 K
D1       2.00000000 sec
D11      0.03000000 sec
TD0      1

===== CHANNEL f1 =====
SFO1    75.4752949 MHz
NUC1    13C
P1      11.00 usec
PLW1    48.00000000 W

===== CHANNEL f2 =====
SFO2    300.1312005 MHz
NUC2    1H
CPDPRG2  waltz16
PCPD2   90.00 usec
PLW2    12.00000000 W
PLW12   0.21333000 W
PLW13   0.10731000 W

F2 - Processing parameters
SI      32768
SF      75.4677516 MHz
WDW     EM
SSB     0
LB      1.00 Hz
GB      0
PC      1.40
  
```

**<sup>1</sup>H and <sup>13</sup>C NMR Spectra of compound 2bc**

DR.RA  
PS-2-231A 10 (0.384) AM2 (Ar.20000.0.556 28.0.00.LS 10)

1. TOF MS ES+  
4.46e5

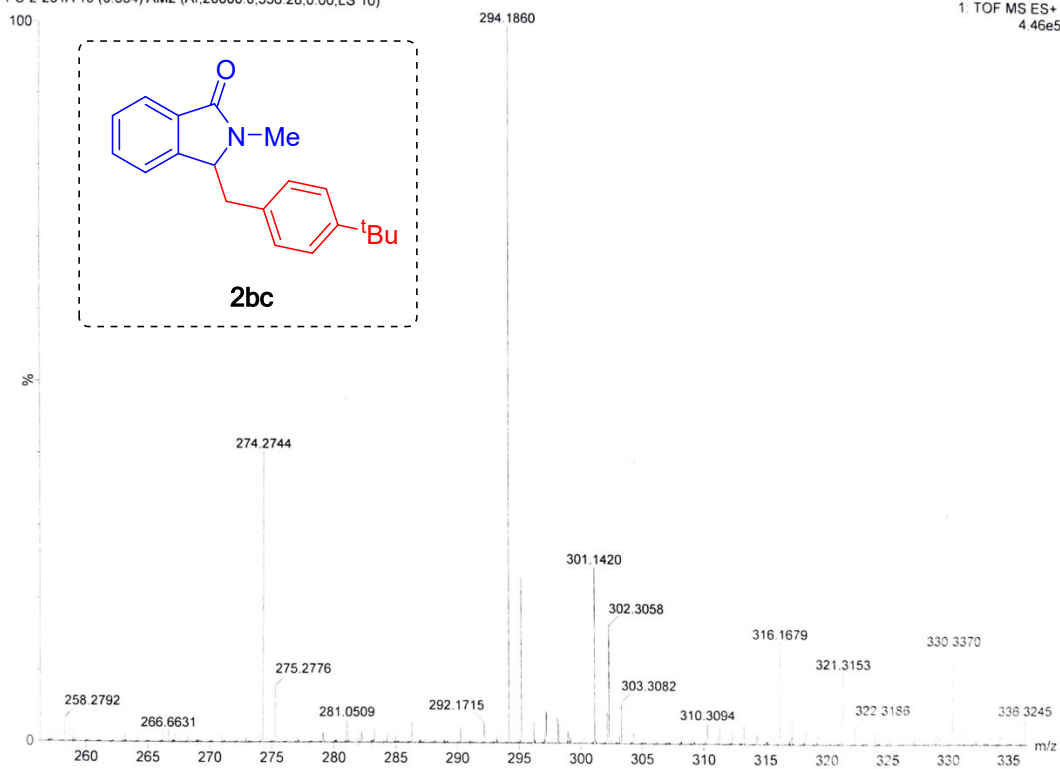

**HRMS Spectrum of compound 2bc**

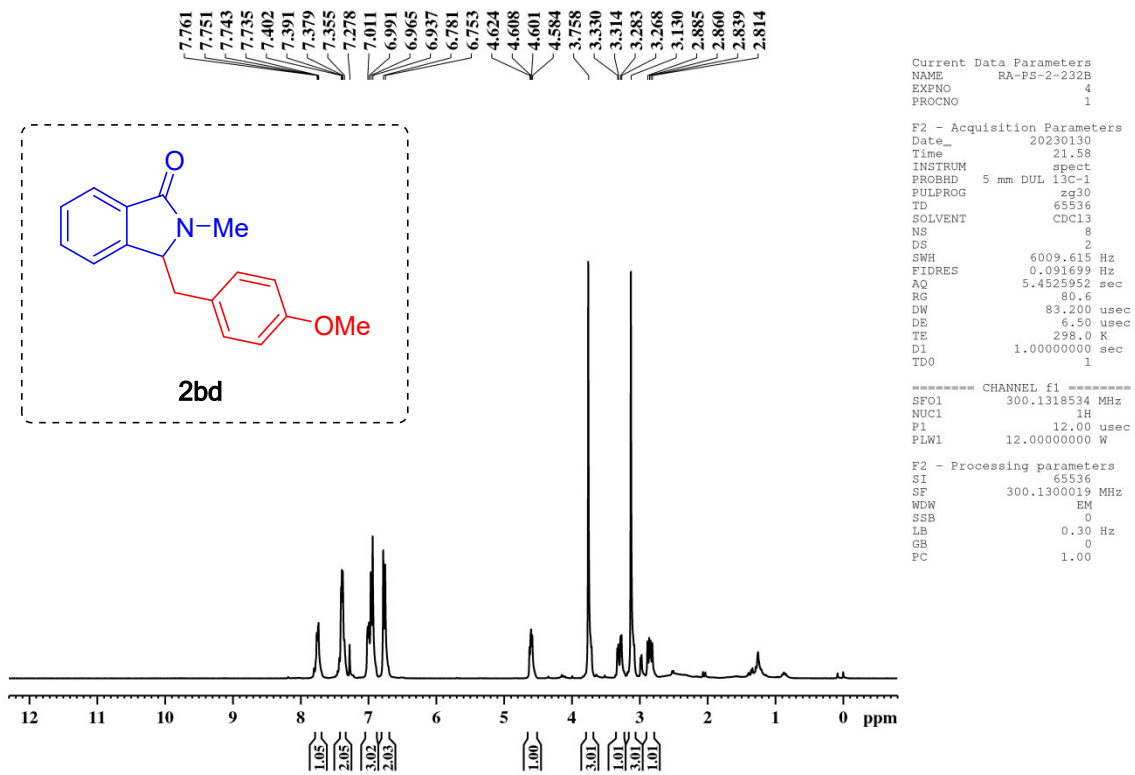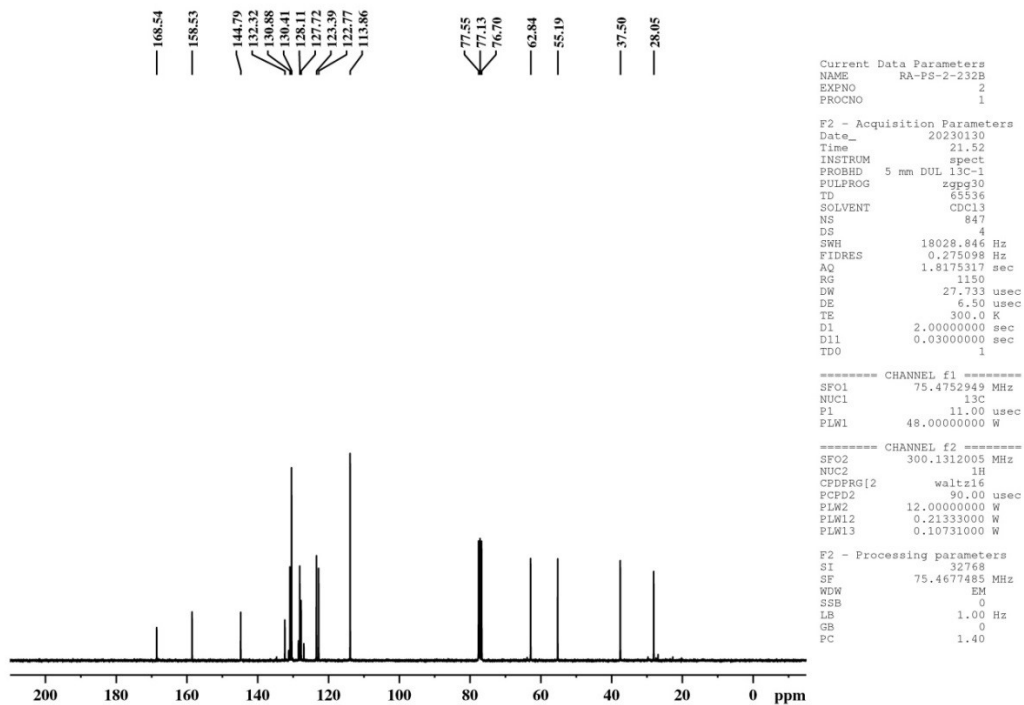

<sup>1</sup>H and <sup>13</sup>C NMR Spectra of compound 2bd

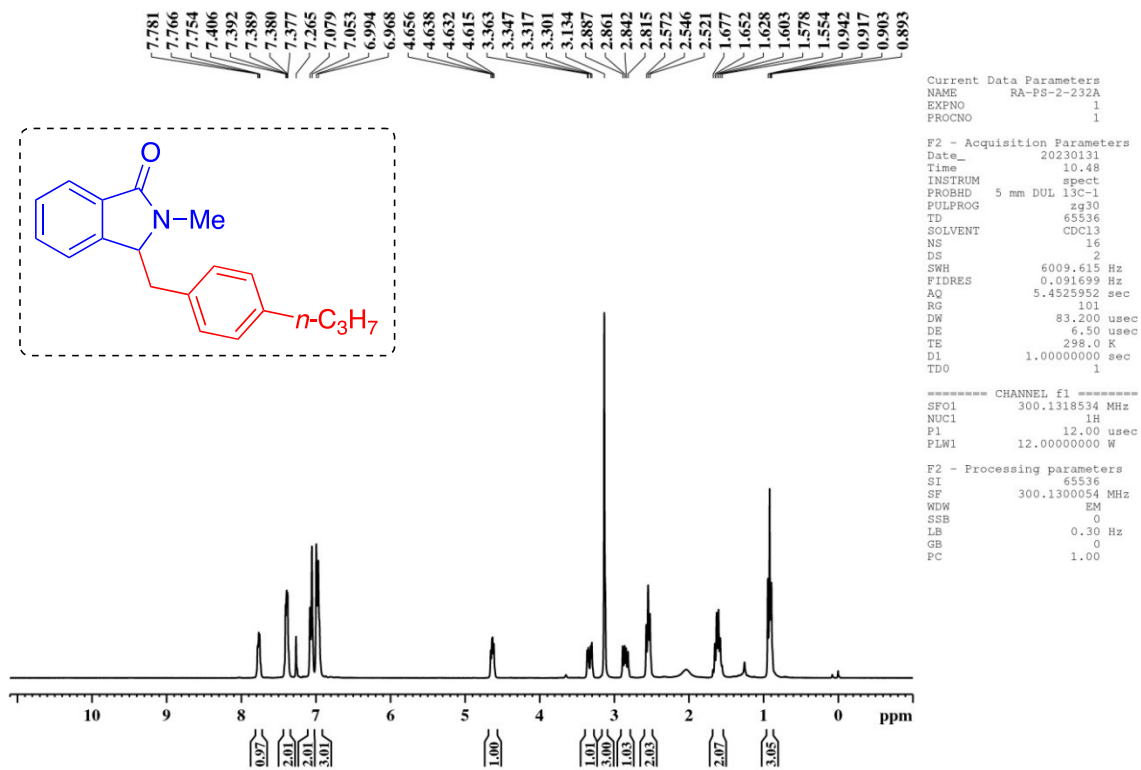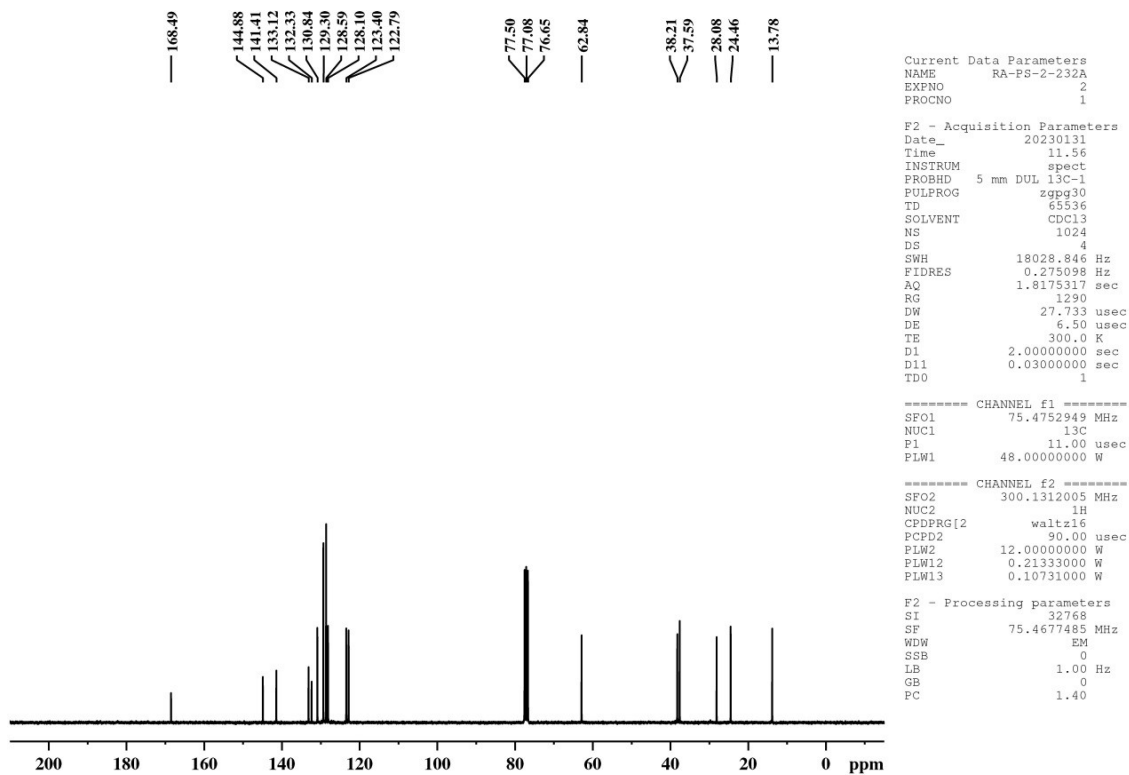

<sup>1</sup>H and <sup>13</sup>C NMR Spectra of compound 2be

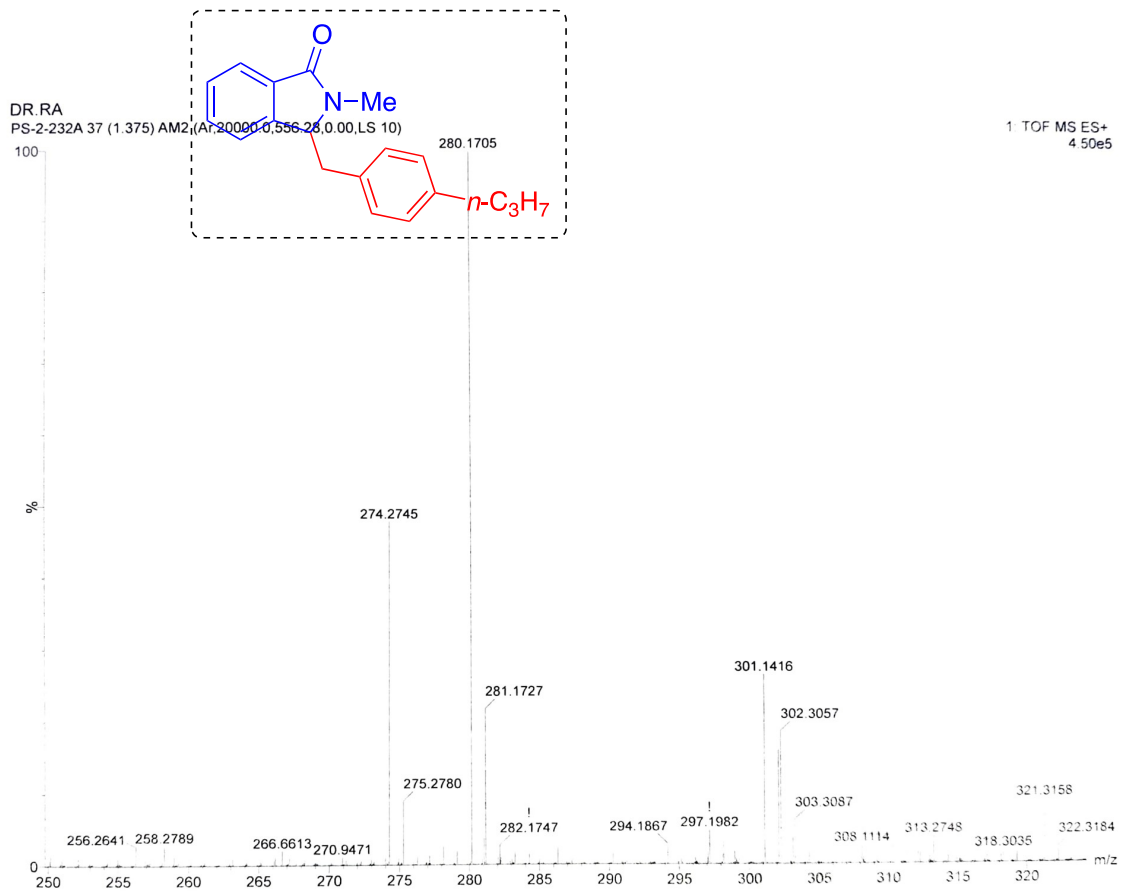

**HRMS Spectrum of compound 2be**



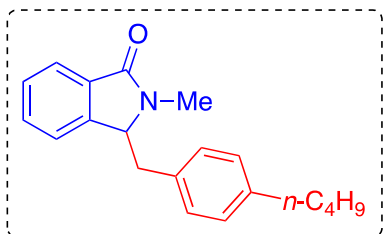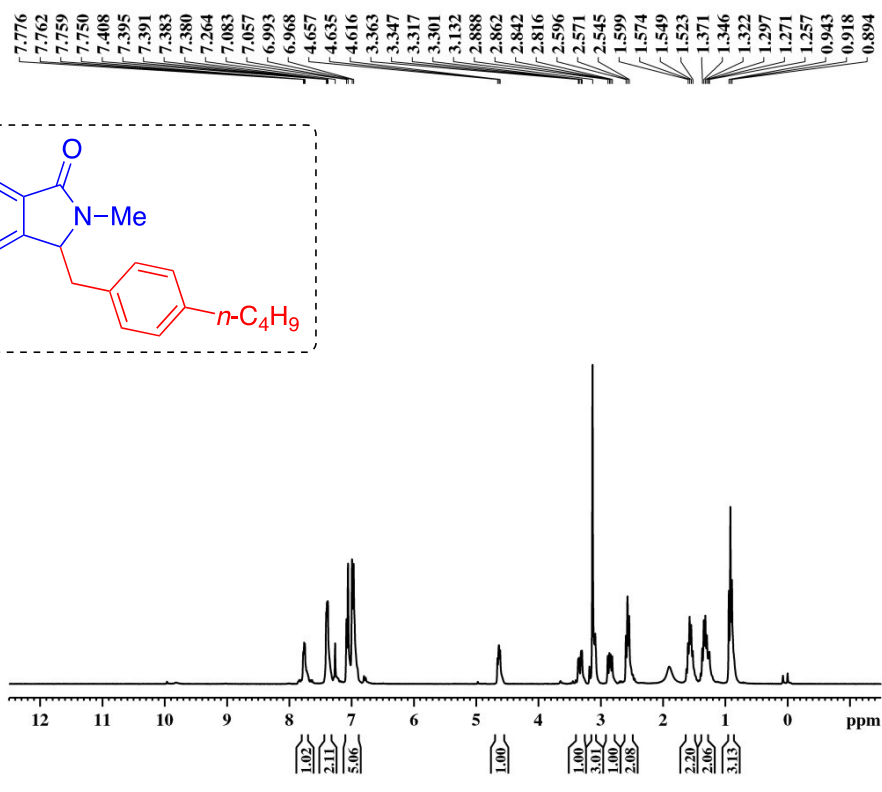

```

Current Data Parameters
NAME      RA-PS-2-231B
EXPNO    1
PROCNO   1

F2 - Acquisition Parameters
Date_    20230131
Time     16.05
INSTRUM  spect
PROBHD   5 mm DUL 13C-1
PULPROG  zg30
TD       65536
SOLVENT  CDCl3
NS       16
DS       2
SWH      6009.615 Hz
FIDRES   0.091699 Hz
AQ       5.4525952 sec
RG       144
DW       83.200 usec
DE       6.50 usec
TE       298.0 K
D1       1.00000000 sec
TDO      1

===== CHANNEL f1 =====
SF01     300.1318534 MHz
NUC1     1H
P1       12.00 usec
PLW1     12.00000000 W

F2 - Processing parameters
SI       65536
SF       300.1300056 MHz
WDW      EM
SSB      0
LB       0.30 Hz
GB       0
PC       1.00

```

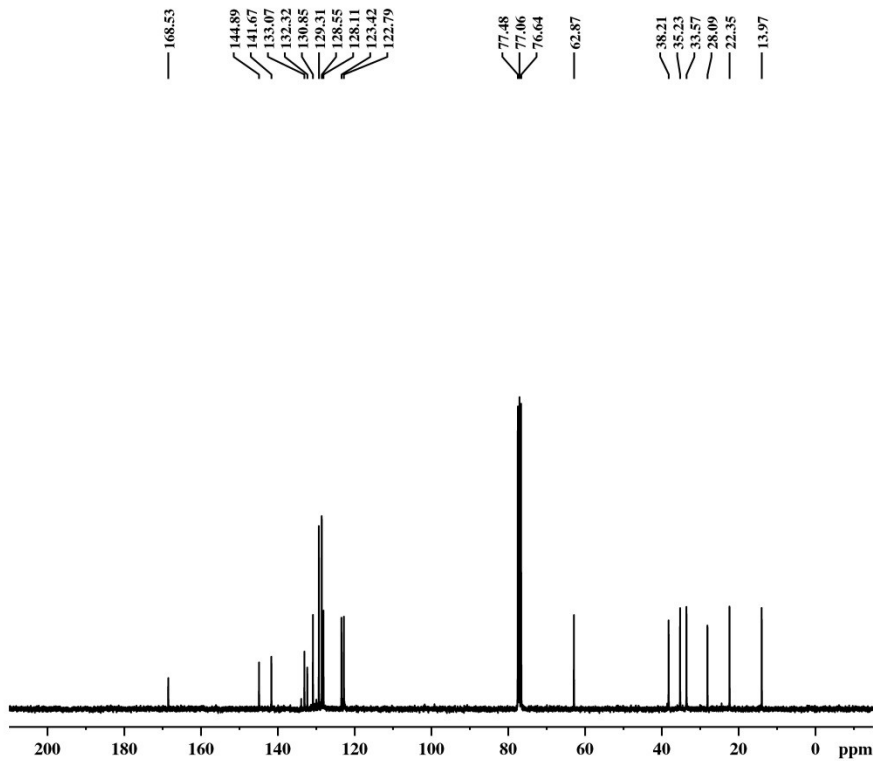

```

Current Data Parameters
NAME RA-PS-2-231B
EXPNO 2
PROCNO 1

F2 - Acquisition Parameters
Date_ 20230131
Time 17.13
INSTRUM spect
PROBHD 5 mm DUL 13C-1
PULPROG zgpg30
TD 65536
SOLVENT cdcl3
NS 1024
DS 4
SWH 18028.846 Hz
FIDRES 0.275098 Hz
AQ 1.8175317 sec
RG 724
DW 27.733 usec
DE 6.50 usec
TE 300.0 K
D1 2.0000000 sec
D11 0.0300000 sec
TDO 1

===== CHANNEL f1 =====
SF01 75.4752949 MHz
NUC1 13C
P1 11.00 usec
PLW1 48.0000000 W

===== CHANNEL f2 =====
SF02 300.1312005 MHz
NUC2 1H
CPDPRG2 waltz16
PCPD2 90.00 usec
PLW2 12.0000000 W
PLW12 0.2133300 W
PLW13 0.1073100 W

F2 - Processing parameters
SI 32768
SF 75.4677477 MHz
WDW EM
SSB 0
LB 1.00 Hz
GB 0
PC 1.40

```

**$^1\text{H}$  and  $^{13}\text{C}$  NMR Spectra of compound 2bf**

DR.RA  
PS-2-231B 11 (0.421) AM2 (Ar,20000.0,556.28,0.00,LS 10)

1: TOF MS ES+  
4.68e5

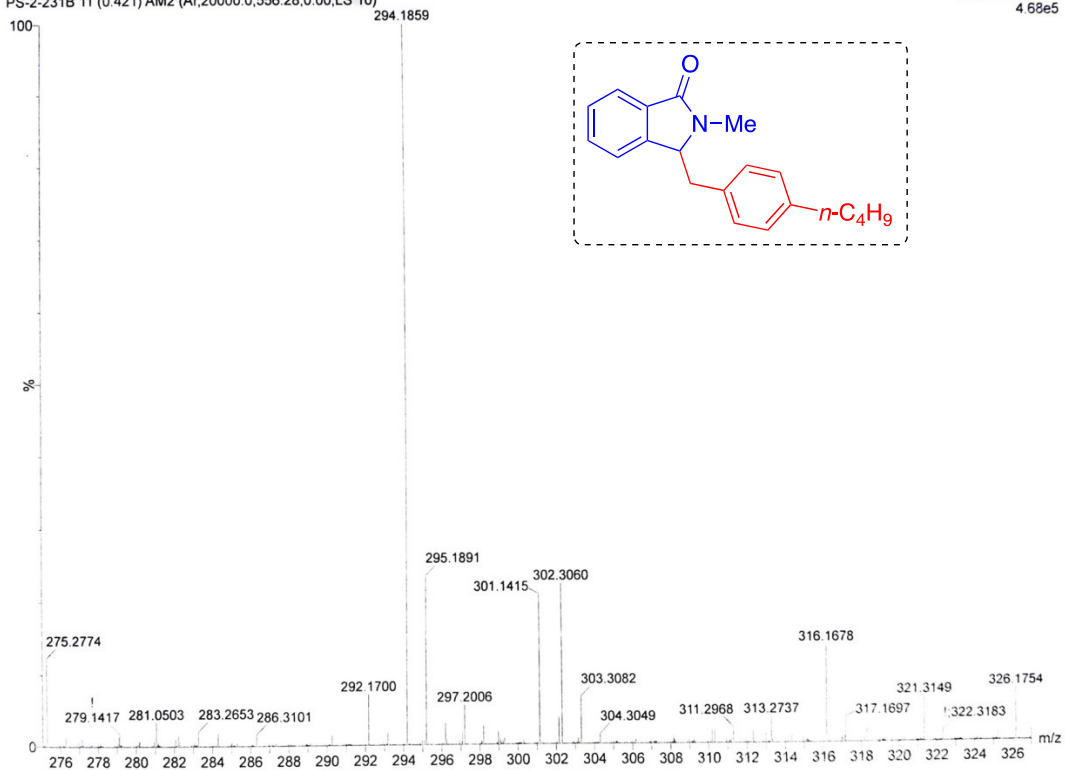

**HRMS Spectrum of compound 2bf**

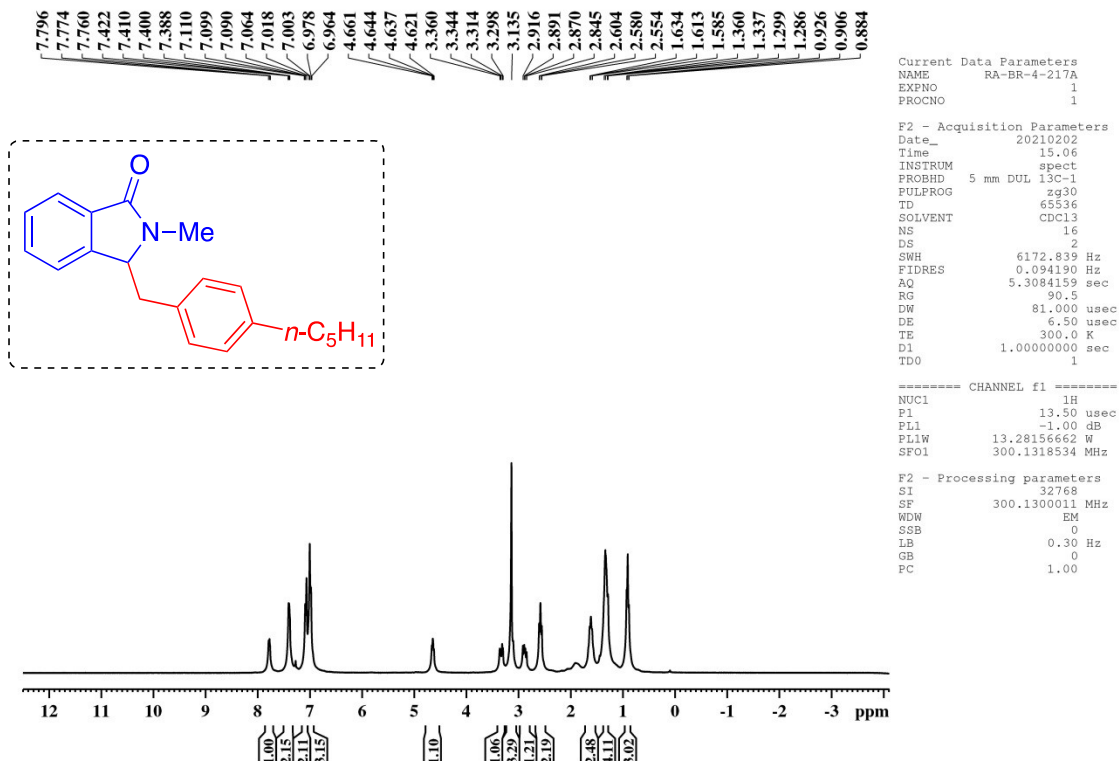

```

Current Data Parameters
NAME RA-BR-4-217A
EXPNO 1
PROCNO 1

F2 - Acquisition Parameters
Date_ 20210202
Time 15.06
INSTRUM spect
PROBHD 5 mm DUL 13C-1
PULPROG zg30
TD 65536
SOLVENT CDCl3
NS 16
DS 2
SWH 6172.839 Hz
FIDRES 0.094190 Hz
AQ 5.3084159 sec
RG 90.5
DW 81.000 usec
DE 6.50 usec
TE 300.0 K
D1 1.00000000 sec
TD0 1

===== CHANNEL f1 =====
NUC1 1H
P1 13.50 usec
PL1 -1.00 dB
PL1W 13.28156662 W
SFO1 300.1318534 MHz

F2 - Processing parameters
SI 32768
SF 300.1300011 MHz
WDW EM
SSB 0
LB 0.30 Hz
GB 0
PC 1.00

```

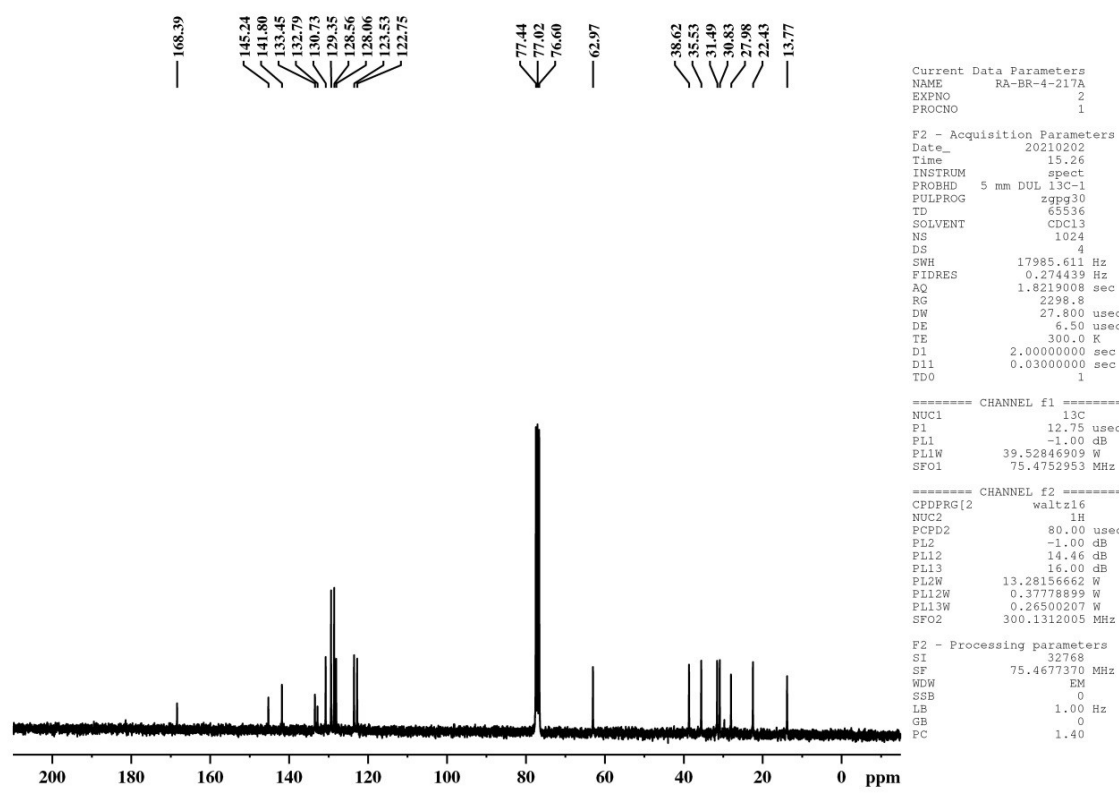

```

Current Data Parameters
NAME RA-BR-4-217A
EXPNO 2
PROCNO 1

F2 - Acquisition Parameters
Date_ 20210202
Time 15.26
INSTRUM spect
PROBHD 5 mm DUL 13C-1
PULPROG zgpg30
TD 65536
SOLVENT CDCl3
NS 1024
DS 4
SWH 17985.611 Hz
FIDRES 0.274439 Hz
AQ 1.8219008 sec
RG 2298.8
DW 27.800 usec
DE 6.50 usec
TE 300.0 K
D1 2.00000000 sec
D11 0.03000000 sec
TD0 1

===== CHANNEL f1 =====
NUC1 13C
P1 12.75 usec
PL1 -1.00 dB
PL1W 39.52846909 W
SFO1 75.4752953 MHz

===== CHANNEL f2 =====
CPDPRG2 waltz16
NUC2 1H
PCPD2 80.00 usec
PL2 -1.00 dB
PL12 14.46 dB
PL13 16.00 dB
PL2W 13.28156662 W
PL12W 0.37778899 W
PL13W 0.26500207 W
SFO2 300.1312005 MHz

F2 - Processing parameters
SI 32768
SF 75.4677370 MHz
WDW EM
SSB 0
LB 1.00 Hz
GB 0
PC 1.40

```

<sup>1</sup>H and <sup>13</sup>C NMR Spectra of compound 2bg

DR.RA  
BR-4-217A 35 (1.301) AM2 (Ar,20000.0,556.28,0.00,LS 10)

1. TOF MS ES+  
4.99e5

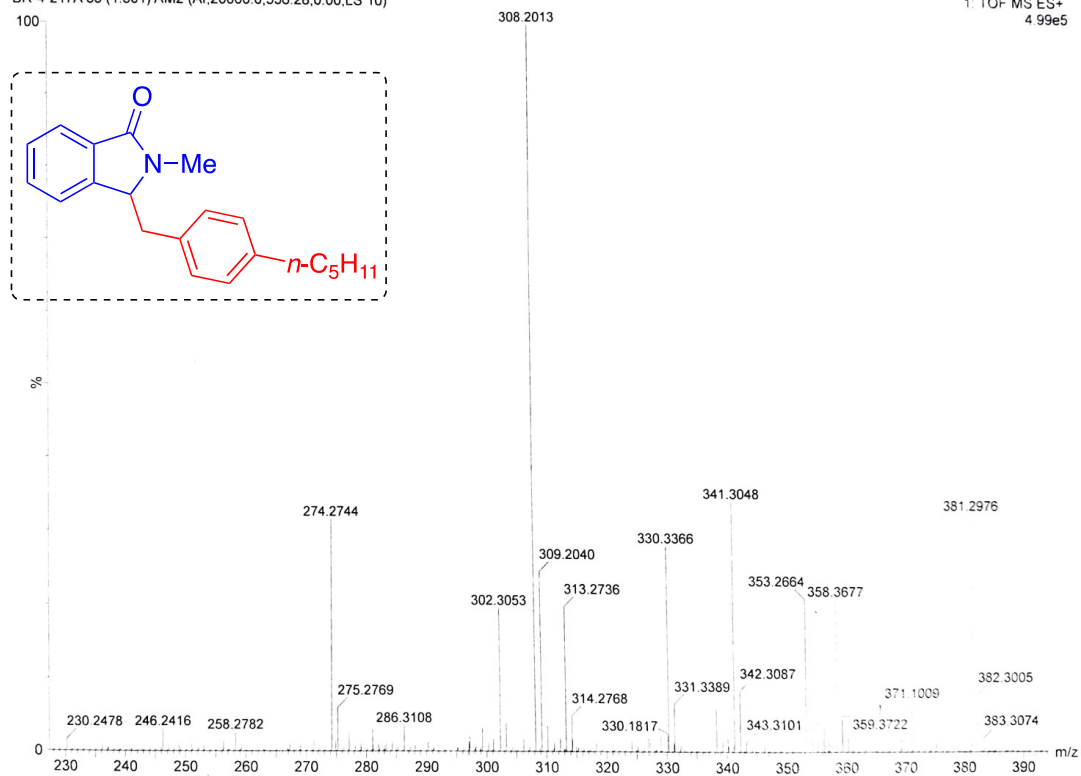

**HRMS Spectrum of compound 2bg**

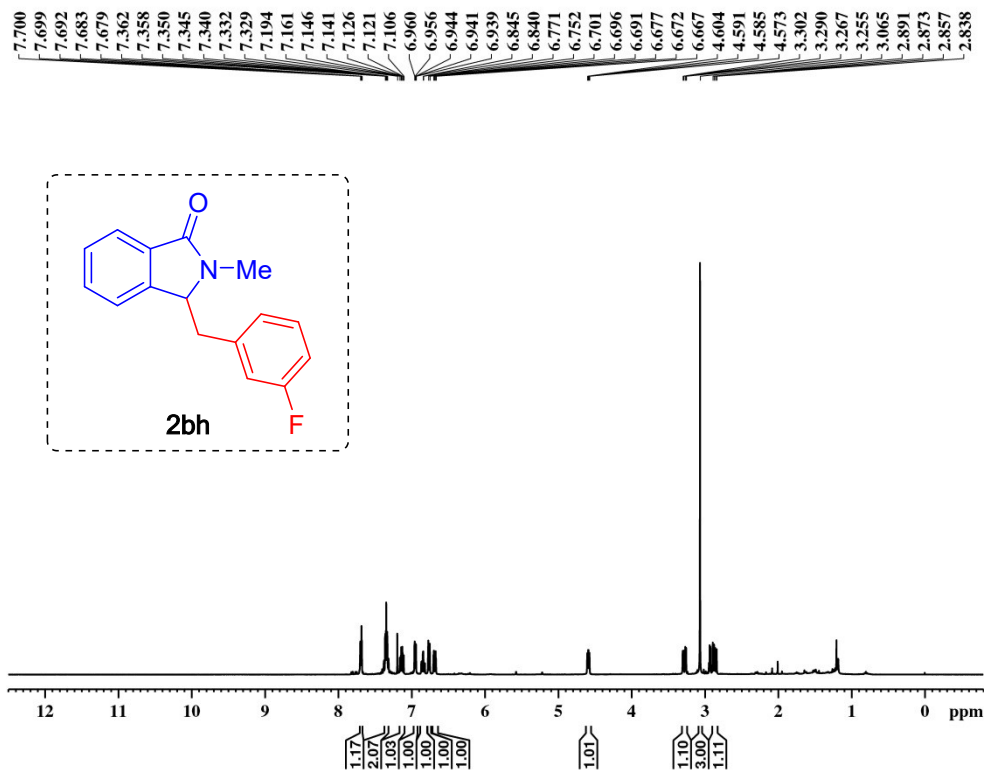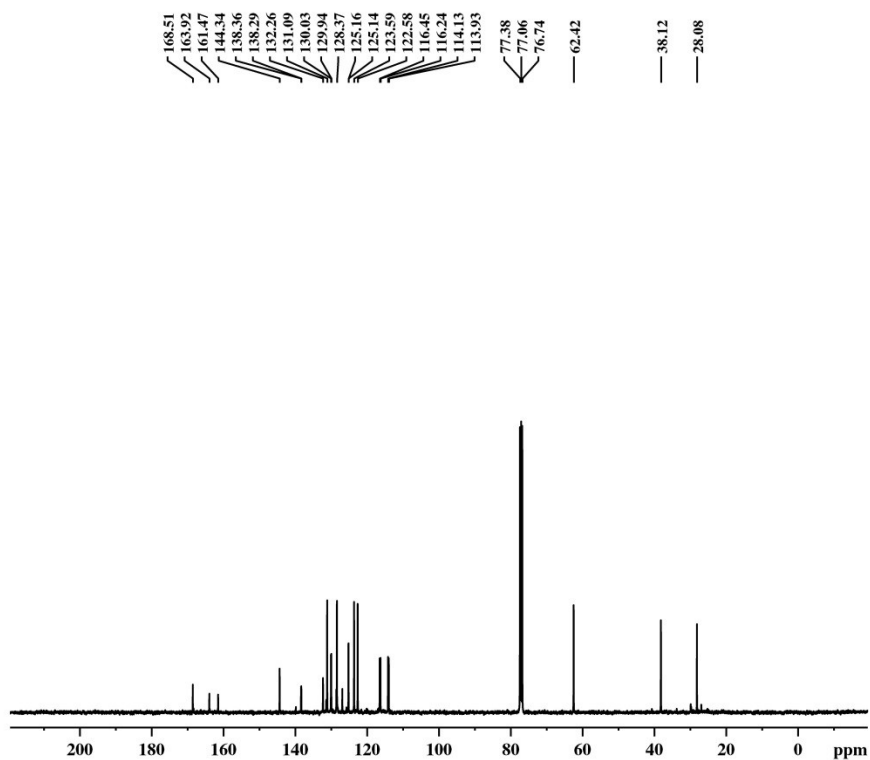

<sup>1</sup>H and <sup>13</sup>C NMR Spectra of compound 2bh

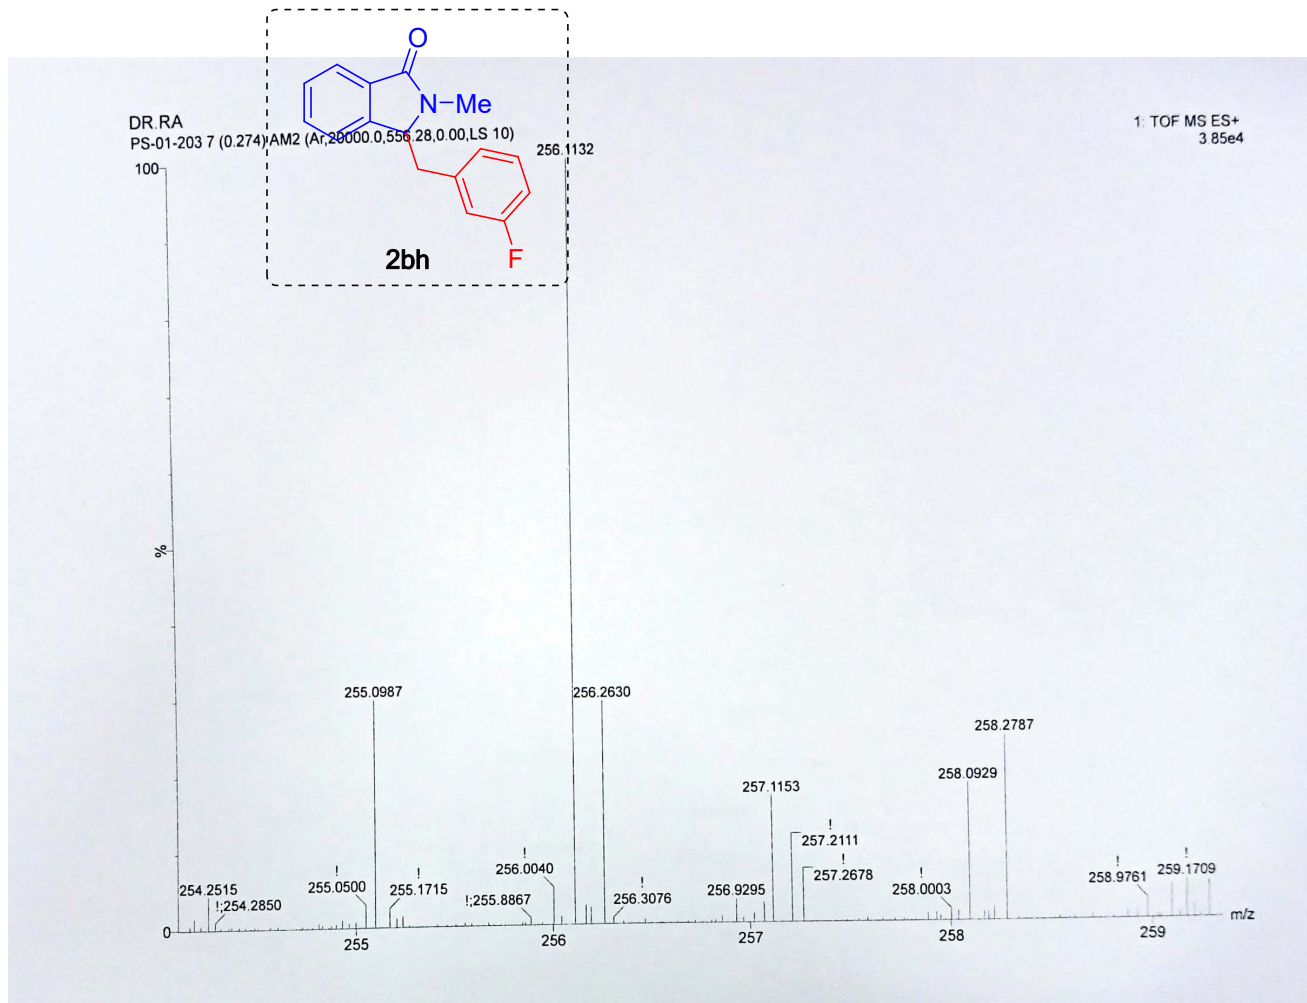

**HRMS Spectrum of compound 2bh**

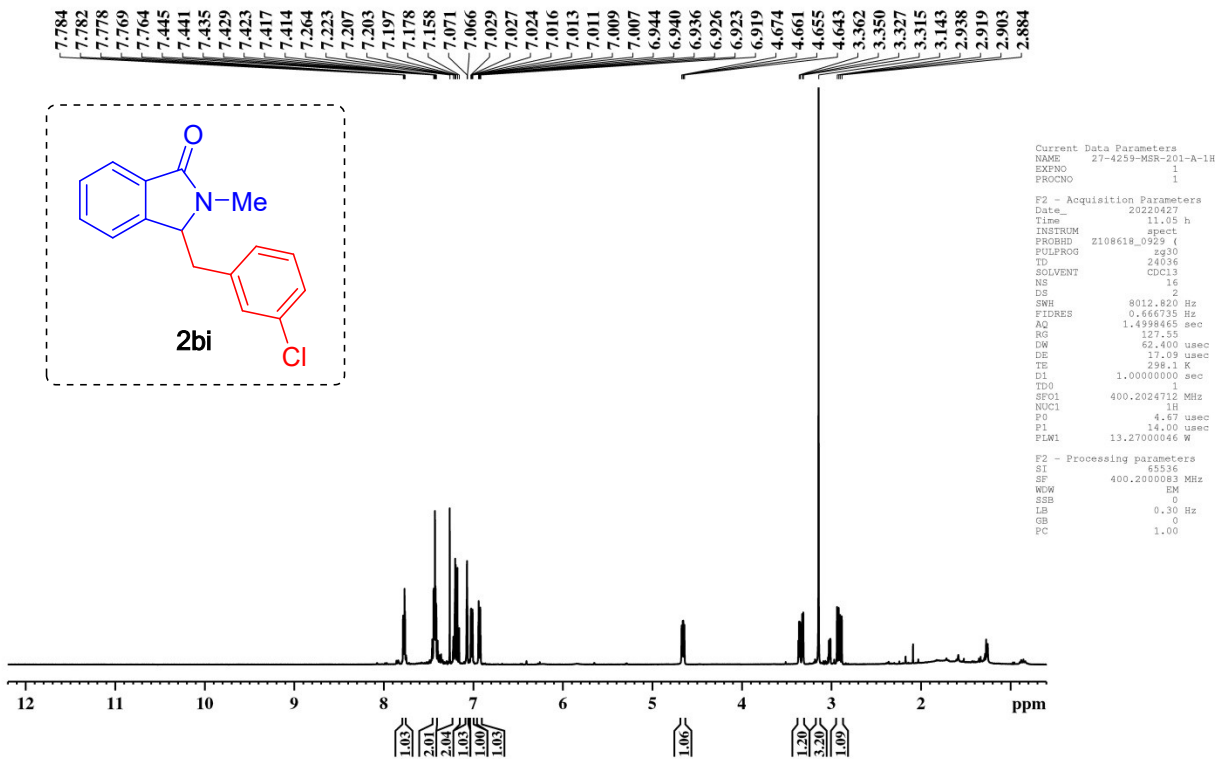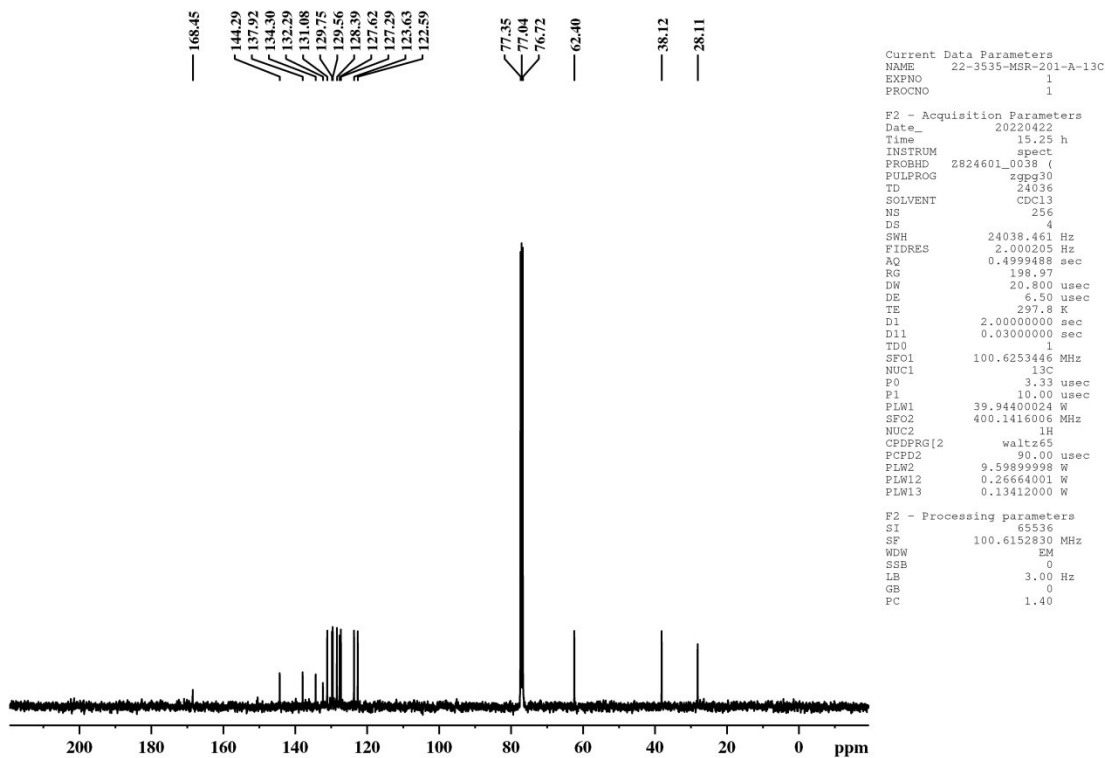

<sup>1</sup>H and <sup>13</sup>C NMR Spectra of compound 2bi



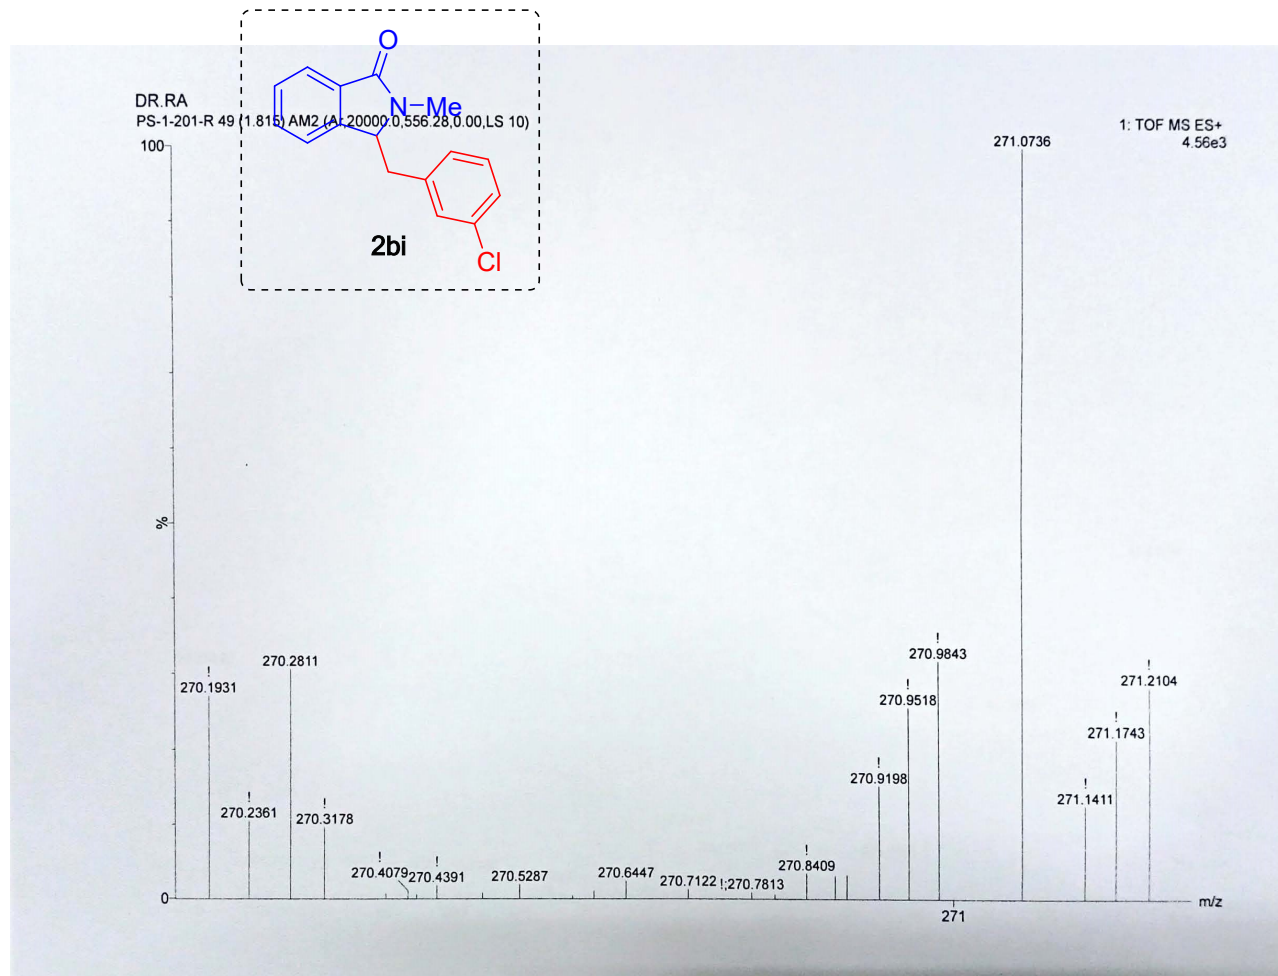

**HRMS Spectrum of compound 2bi**

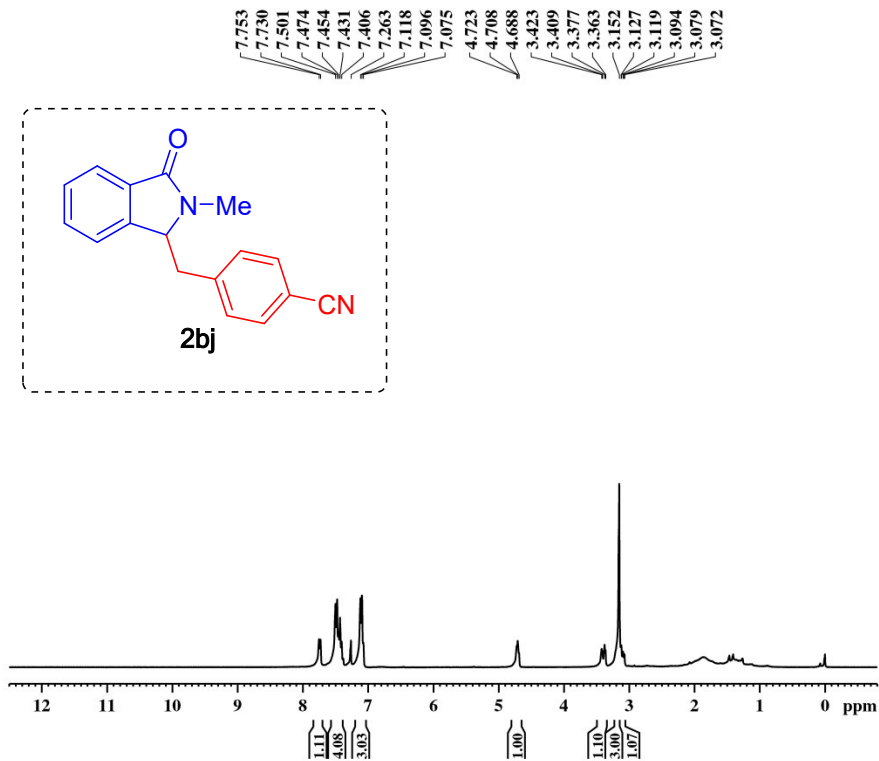

```

Current Data Parameters
NAME      RA-PS-1-57
EXPNO    3
PROCNO   1

F2 - Acquisition Parameters
Date_    20211010
Time     20.04
INSTRUM  spect
PROBHD   5 mm DUL 13C-1
PULPROG  zg30
TD       65536
SOLVENT  CDCl3
NS       16
DS       2
SWH      6172.839 Hz
FIDRES   0.094190 Hz
AQ       5.3084159 sec
RG       181
DW       81.000 usec
DE       6.50 usec
TE       300.0 K
D1       1.00000000 sec
TD0      1

===== CHANNEL f1 =====
NUC1     1H
P1       14.00 usec
PL1      -2.00 dB
PL1W     16.72050095 W
SFO1     300.1318534 MHz

F2 - Processing parameters
SI       32768
SF       300.1300055 MHz
WDW      EM
SSB      0
LB       0.30 Hz
GB       0
PC       1.00
  
```

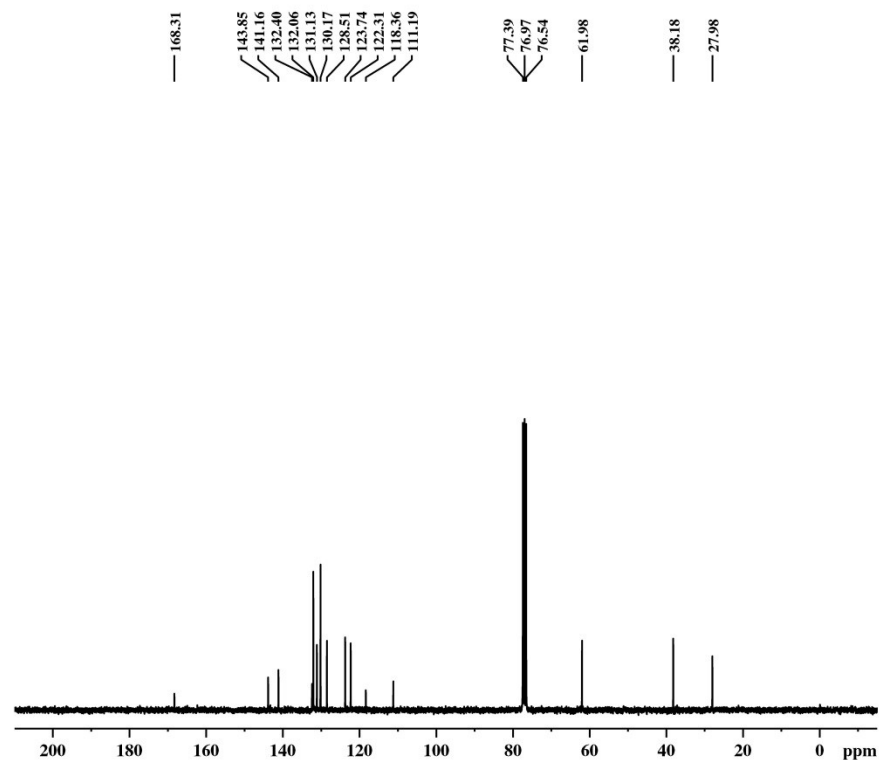

```

Current Data Parameters
NAME      RA-PS-1-57
EXPNO    4
PROCNO   1

F2 - Acquisition Parameters
Date_    20211010
Time     21.11
INSTRUM  spect
PROBHD   5 mm DUL 13C-1
PULPROG  zgpg30
TD       65536
SOLVENT  CDCl3
NS       1024
DS       4
SWH      17985.611 Hz
FIDRES   0.274439 Hz
AQ       1.8219008 sec
RG       1290.2
DW       27.800 usec
DE       6.50 usec
TE       300.0 K
D1       2.00000000 sec
D11     0.03000000 sec
TD0      1

===== CHANNEL f1 =====
NUC1     13C
P1       10.63 usec
PL1      -2.00 dB
PL1W     49.76339722 W
SFO1     75.4752953 MHz

===== CHANNEL f2 =====
CPDPRG[2] waltz16
NUC2     1H
PCPD2    80.00 usec
PL2      -2.00 dB
PL12     13.46 dB
PL13     16.00 dB
PL2W     16.72050095 W
PL12W    0.47560814 W
PL13W    0.26500207 W
SFO2     300.1312005 MHz

F2 - Processing parameters
SI       32768
SF       75.4677490 MHz
WDW      EM
SSB      0
LB       1.00 Hz
GB       0
PC       1.40
  
```

**<sup>1</sup>H and <sup>13</sup>C NMR Spectra of compound 2bj**

DR.RA  
PS-01-56B 5 (0.200) AM2 (Ar,20000.0,556.28,0.00,LS 10)

1. TOF MS ES+  
4.29e5

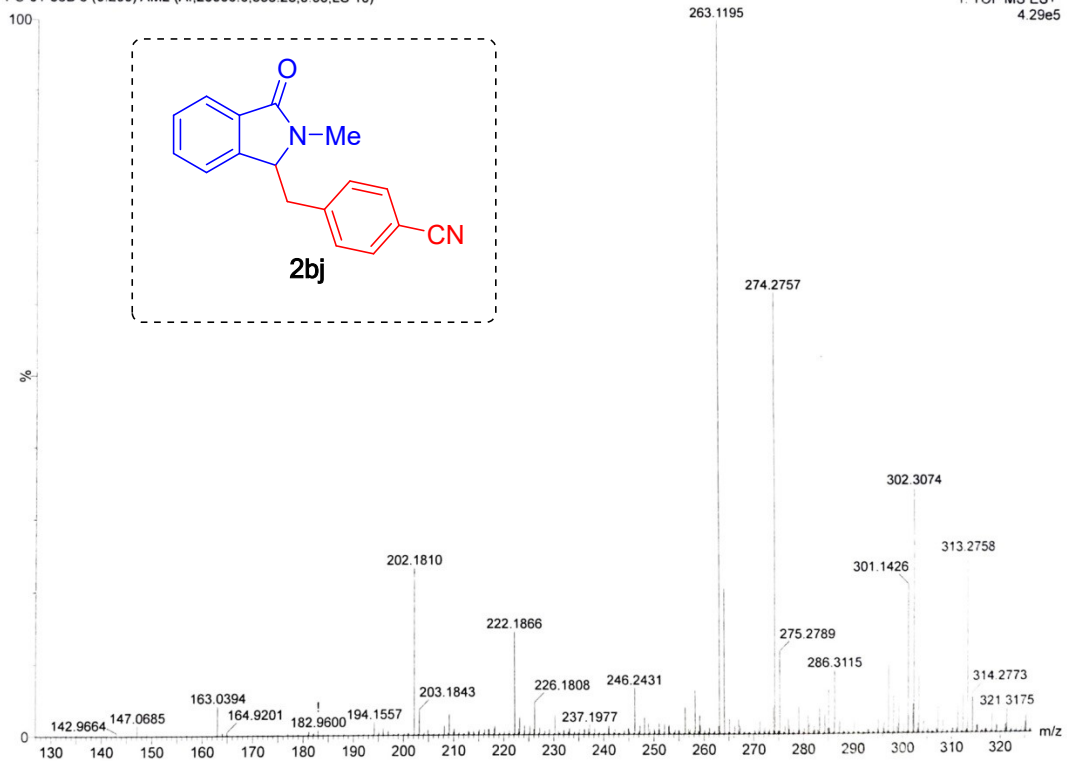

**$^1\text{H}$  and  $^{13}\text{C}$  NMR Spectra of compound 2bj**

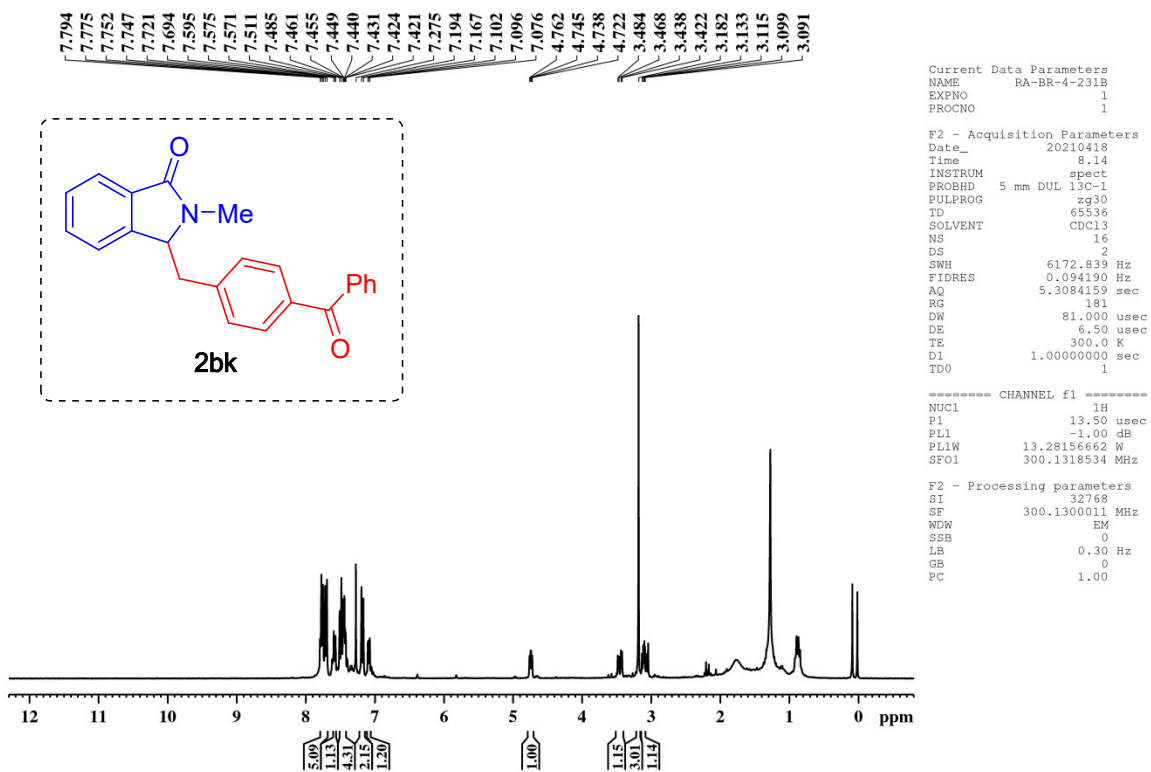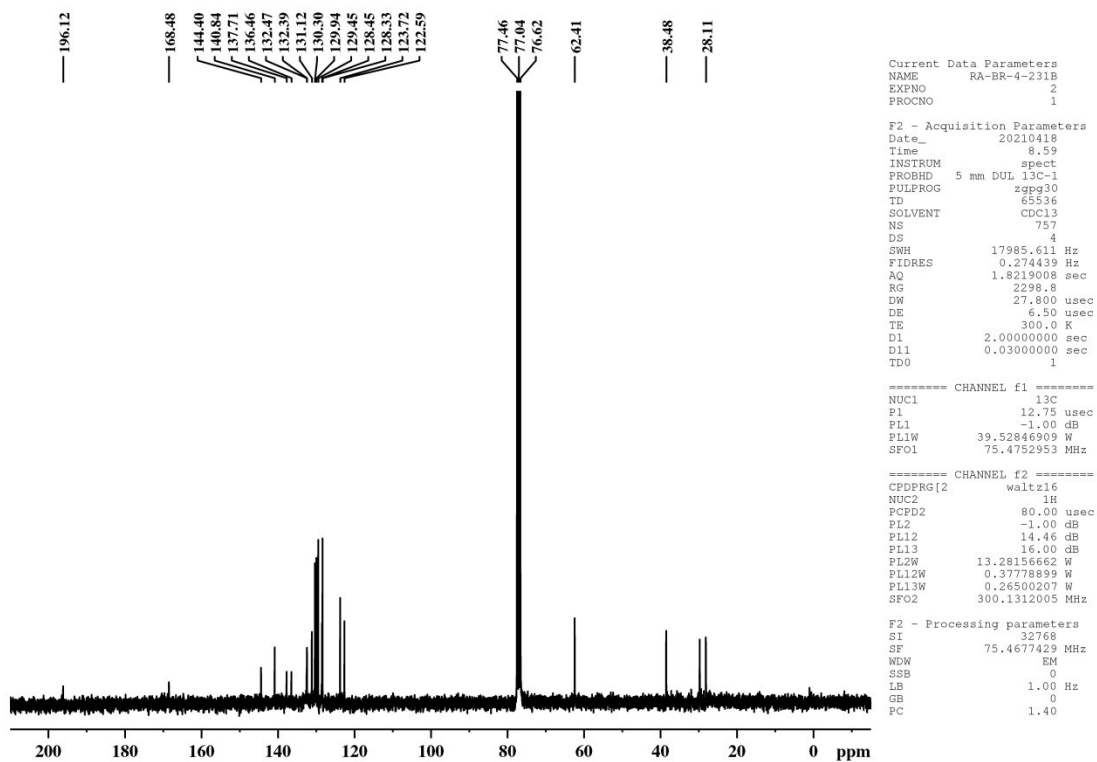

**<sup>1</sup>H and <sup>13</sup>C NMR Spectra of compound 2bk**

DR. RA  
BR-4-231B 9 (0.347) AM2 (Ar.20000.0,556.28.0.00,LS 10)

1: TOF MS ES+  
2.05e5

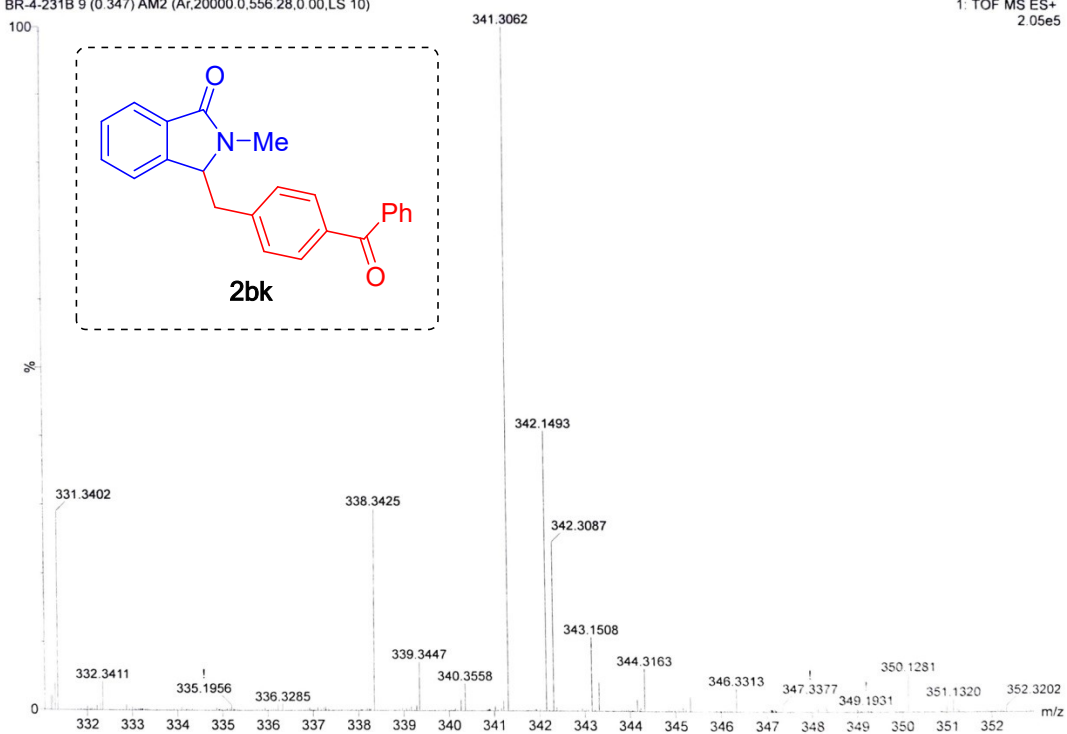

**HRMS Spectrum of compound 2bk**

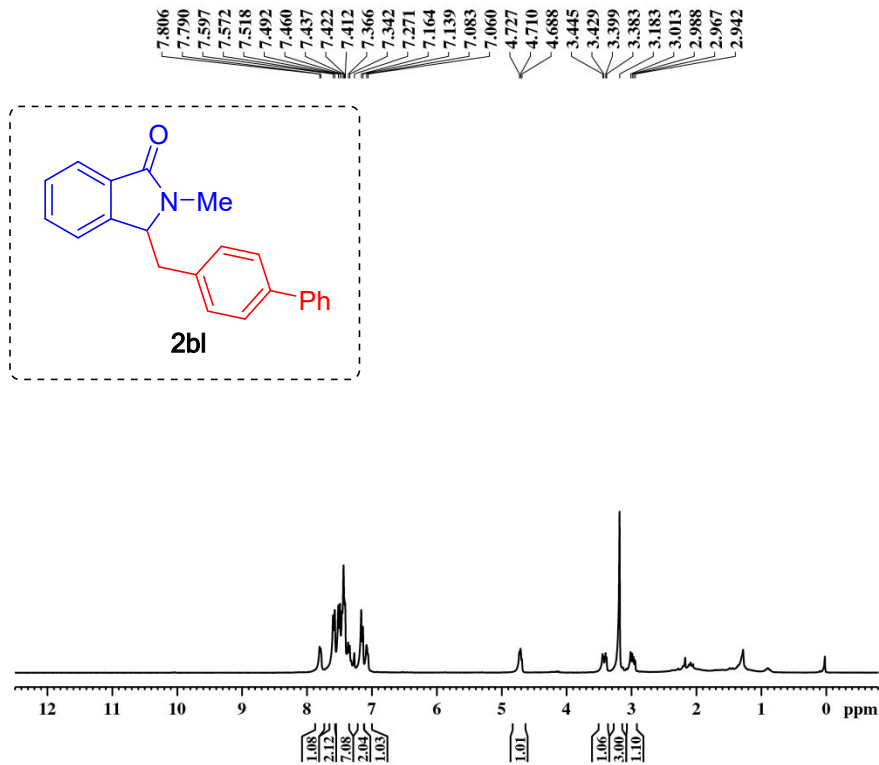

```
Current Data Parameters
NAME RA-BR-4-227A
EXPNO 1
PROCNO 1

F2 - Acquisition Parameters
Date_ 20210417
Time 11.35
INSTRUM spect
PROBHD 5 mm DUL 13C-1
PULPROG zg30
TD 65536
SOLVENT CDCl3
NS 16
DS 2
SWH 6172.839 Hz
FIDRES 0.094190 Hz
AQ 5.3084159 sec
RG 161.3
DW 81.000 usec
DE 6.50 usec
TE 300.0 K
D1 1.00000000 sec
TDO 1
```

```
===== CHANNEL f1 =====
NUC1 1H
P1 13.50 usec
PL1 -1.00 dB
PL1W 13.28156662 W
SFO1 300.1318534 MHz
```

```
F2 - Processing parameters
SI 32768
SF 300.1300011 MHz
WDW EM
SSB 0
LB 0.30 Hz
GB 0
PC 1.00
```

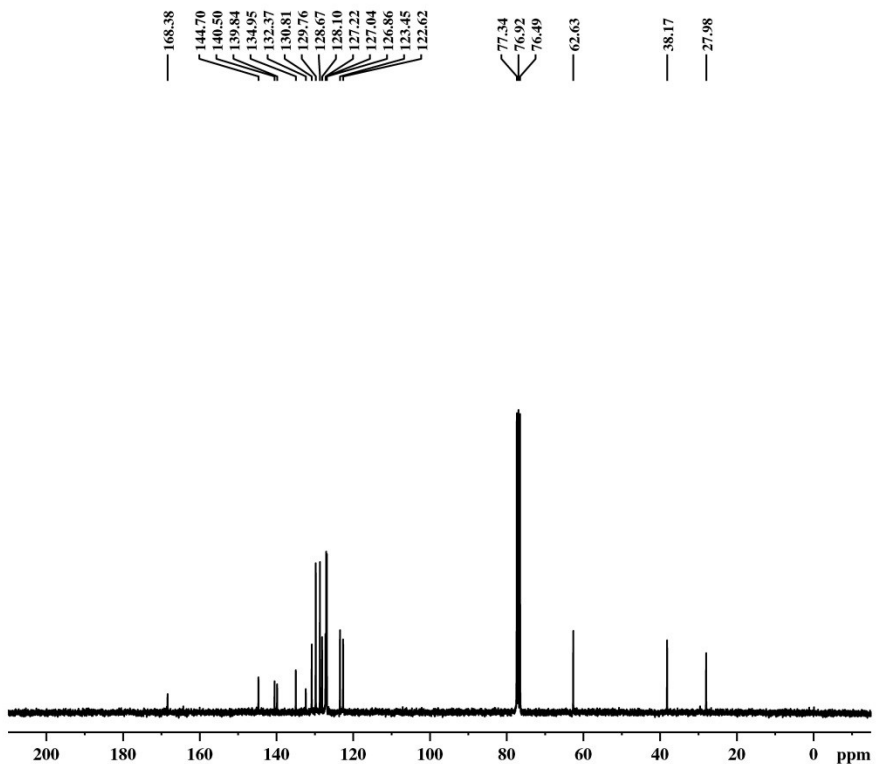

```
Current Data Parameters
NAME RA-BR-4-227A
EXPNO 2
PROCNO 1
```

```
F2 - Acquisition Parameters
Date_ 20210417
Time 12.04
INSTRUM spect
PROBHD 5 mm DUL 13C-1
PULPROG zgpg30
TD 65536
SOLVENT CDCl3
NS 1024
DS 4
SWH 17985.611 Hz
FIDRES 0.274439 Hz
AQ 1.8219008 sec
RG 2298.8
DW 27.800 usec
DE 6.50 usec
TE 300.0 K
D1 2.00000000 sec
D11 0.03000000 sec
TDO 1
```

```
===== CHANNEL f1 =====
NUC1 13C
P1 12.75 usec
PL1 -1.00 dB
PL1W 39.52846909 W
SFO1 75.4752953 MHz
```

```
===== CHANNEL f2 =====
CPDPRG[2] waltz16
NUC2 1H
PCPD2 80.00 usec
PL2 -1.00 dB
PL12 14.46 dB
PL13 16.00 dB
PL2W 13.28156662 W
PL12W 0.37778899 W
PL13W 0.26500207 W
SFO2 300.1312005 MHz
```

```
F2 - Processing parameters
SI 32768
SF 75.4677537 MHz
WDW EM
SSB 0
LB 1.00 Hz
GB 0
PC 1.40
```

<sup>1</sup>H and <sup>13</sup>C NMR Spectra of compound 2bl

DR.RA  
BR-4-227A 12 (0.457) AM2 (Ar,20000.0,556.28,0.00,LS 10)

1: TOF MS ES+  
2.51e5

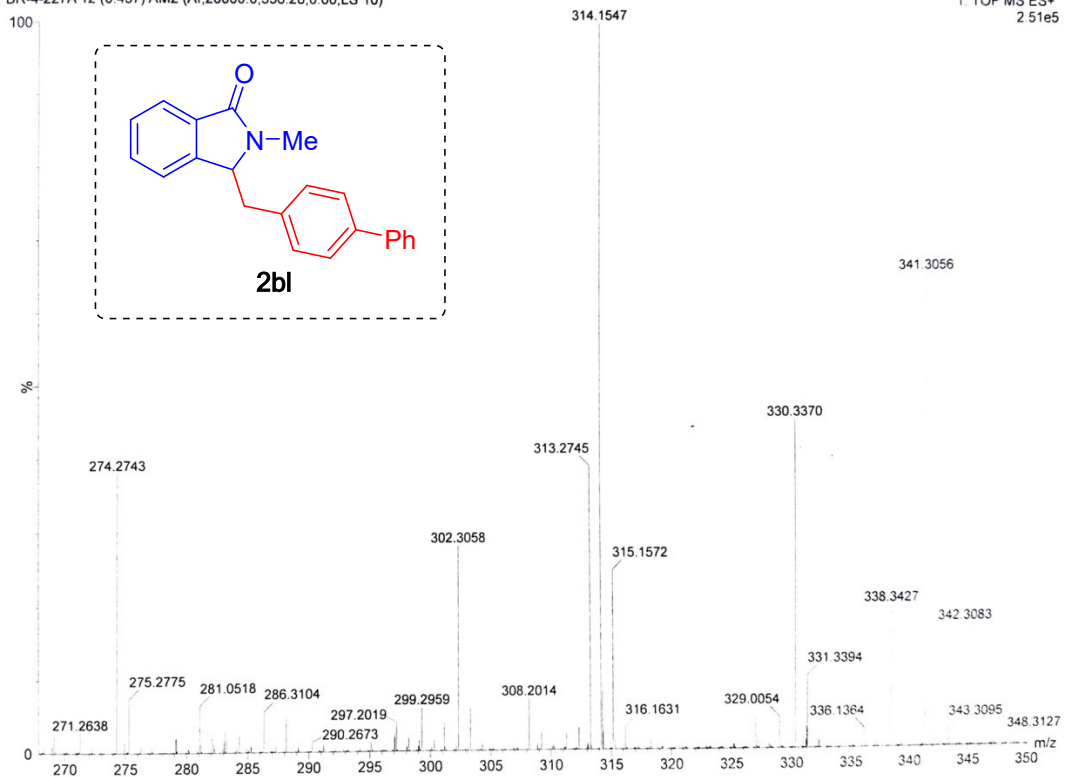

**HRMS Spectrum of compound 2bl**

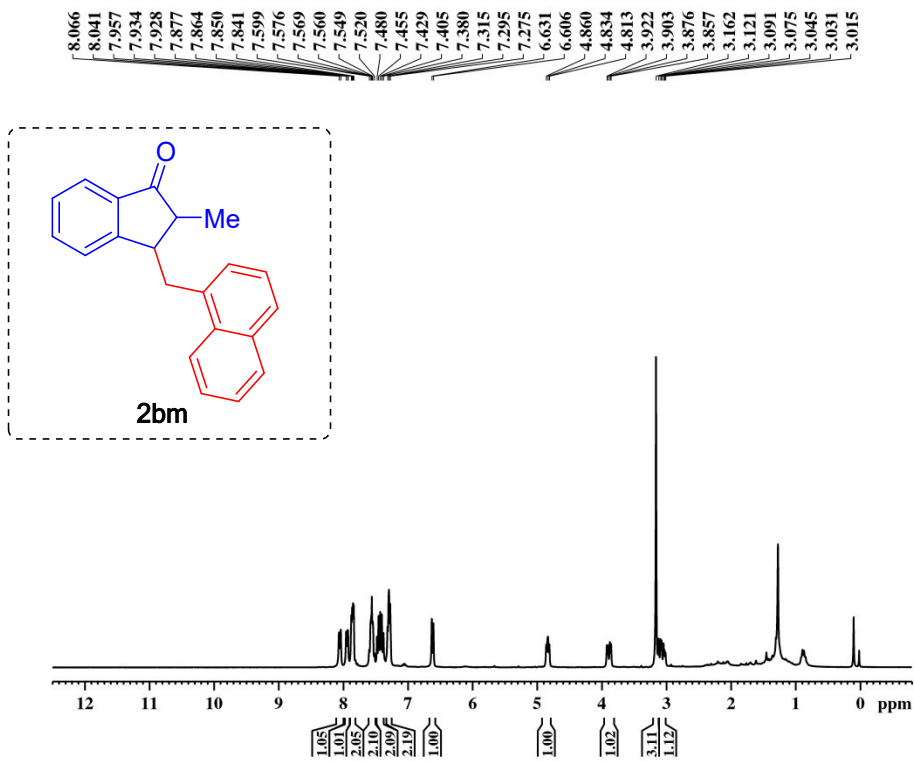

```
Current Data Parameters
NAME RA-BR-4-225A
EXPNO 1
PROCNO 1

F2 - Acquisition Parameters
Date_ 20210418
Time 7.48
INSTRUM spect
PROBHD 5 mm DUL 13C-1
PULPROG zg30
TD 65536
SOLVENT CDC13
NS 16
DS 2
SWH 6172.839 Hz
FIDRES 0.094190 Hz
AQ 5.3084159 sec
RG 90.5
DW 81.000 usec
DE 6.50 usec
TE 300.0 K
D1 1.0000000 sec
TD0 1

===== CHANNEL f1 =====
NUC1 1H
P1 13.50 usec
PL1 -1.00 dB
PL1W 13.2815662 W
SFO1 300.1318534 MHz

F2 - Processing parameters
SI 32768
SF 300.1300011 MHz
WDW EM
SSB 0
LB 0.30 Hz
GB 0
PC 1.00
```

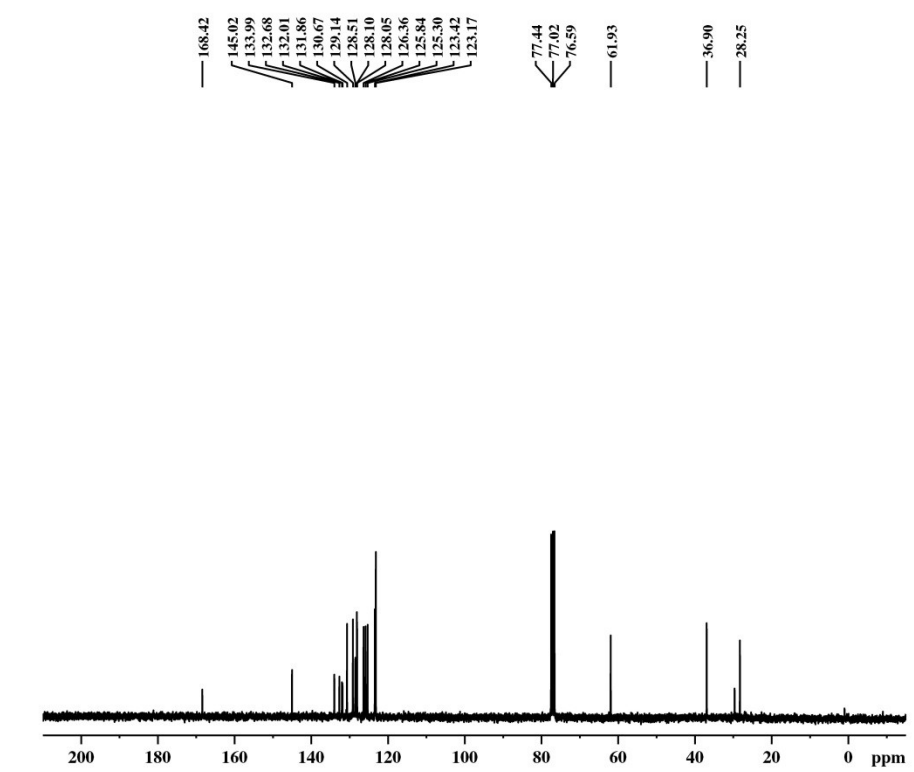

```
Current Data Parameters
NAME RA-BR-4-225A
EXPNO 2
PROCNO 1

F2 - Acquisition Parameters
Date_ 20210418
Time 8.01
INSTRUM spect
PROBHD 5 mm DUL 13C-1
PULPROG zgpg30
TD 65536
SOLVENT CDC13
NS 132
DS 4
SWH 17985.611 Hz
FIDRES 0.274439 Hz
AQ 1.8219008 sec
RG 2298.8
DW 27.800 usec
DE 6.50 usec
TE 300.0 K
D1 2.0000000 sec
D11 0.0300000 sec
TD0 1

===== CHANNEL f1 =====
NUC1 13C
P1 12.75 usec
PL1 -1.00 dB
PL1W 39.5284699 W
SFO1 75.4752953 MHz

===== CHANNEL f2 =====
CPDPRG[2] waltz16
NUC2 1H
PCPD2 80.00 usec
PL2 -1.00 dB
PL12 14.46 dB
PL13 16.00 dB
PL2W 13.2815662 W
PL12W 0.37778899 W
PL13W 0.26500207 W
SFO2 300.1312005 MHz

F2 - Processing parameters
SI 32768
SF 75.4677530 MHz
WDW EM
SSB 0
LB 1.00 Hz
GB 0
PC 1.40
```

<sup>1</sup>H and <sup>13</sup>C NMR Spectra of compound 2bm



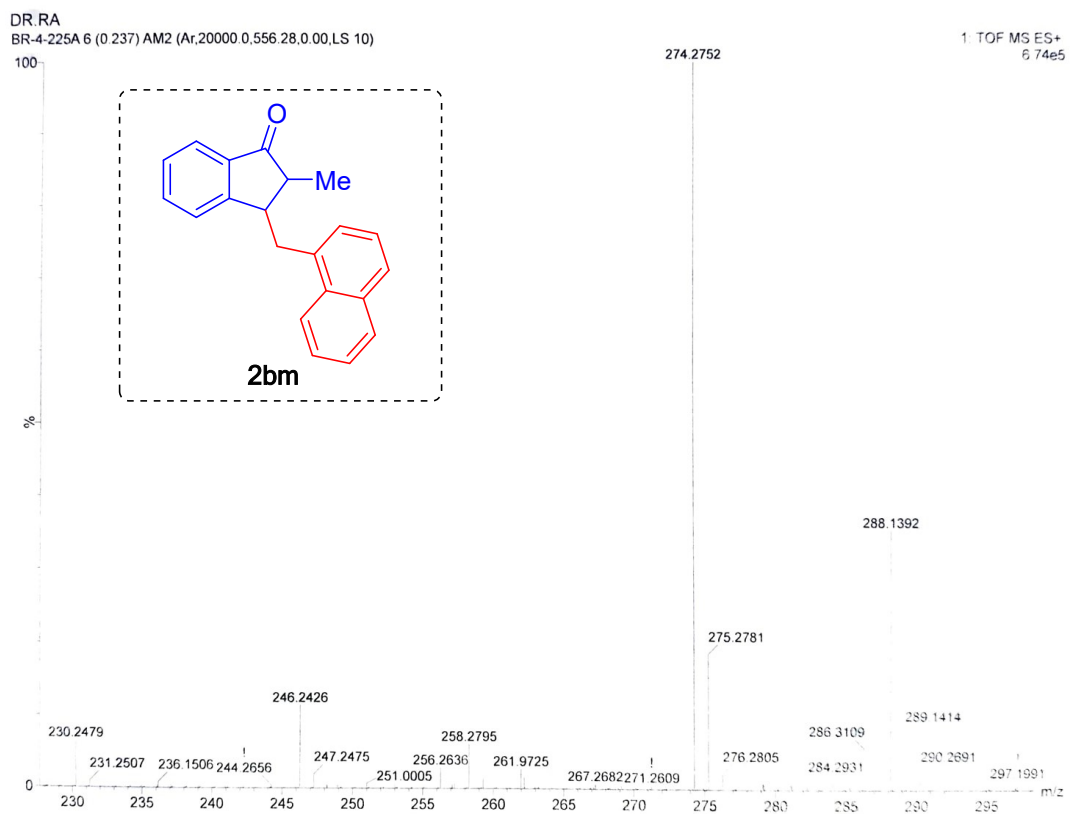

**HRMS Spectrum of compound 2bm**

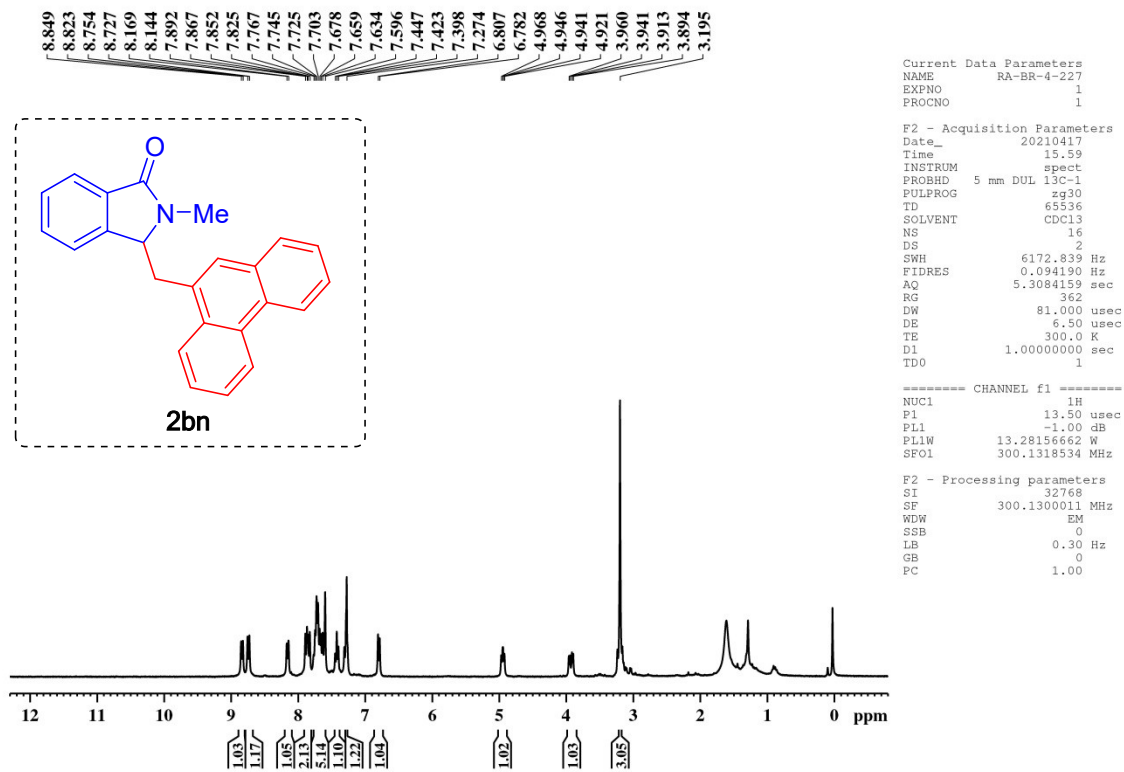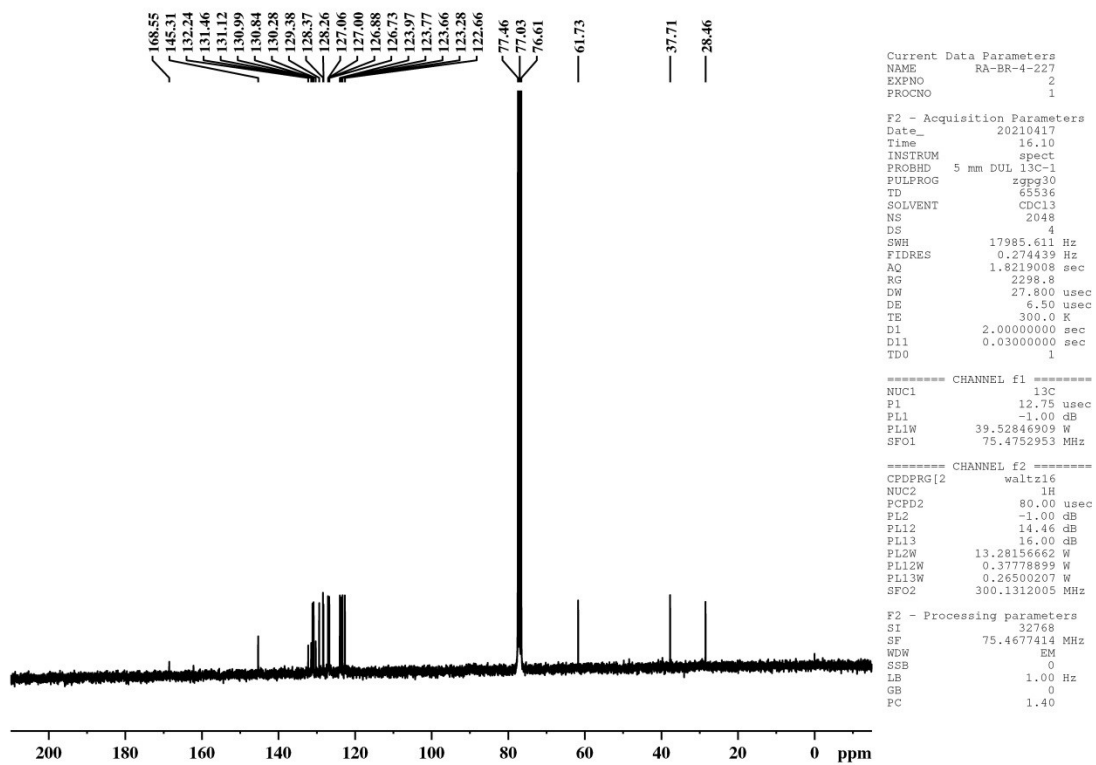

<sup>1</sup>H and <sup>13</sup>C NMR Spectra of compound 2bn

DR.RA  
BR-04-227 9 (0.347) AM2 (Ar,20000.0,556.28,0.00,LS 10)

1: TOF MS ES+  
3.55e5

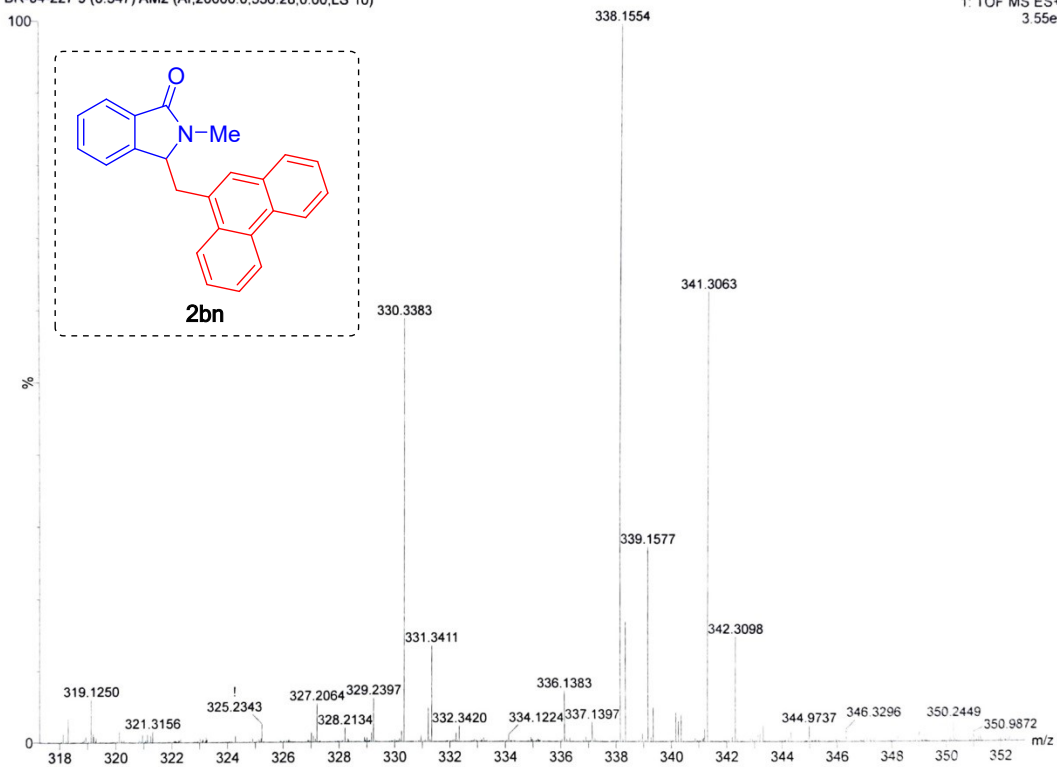

HRMS Spectrum of compound 2bn

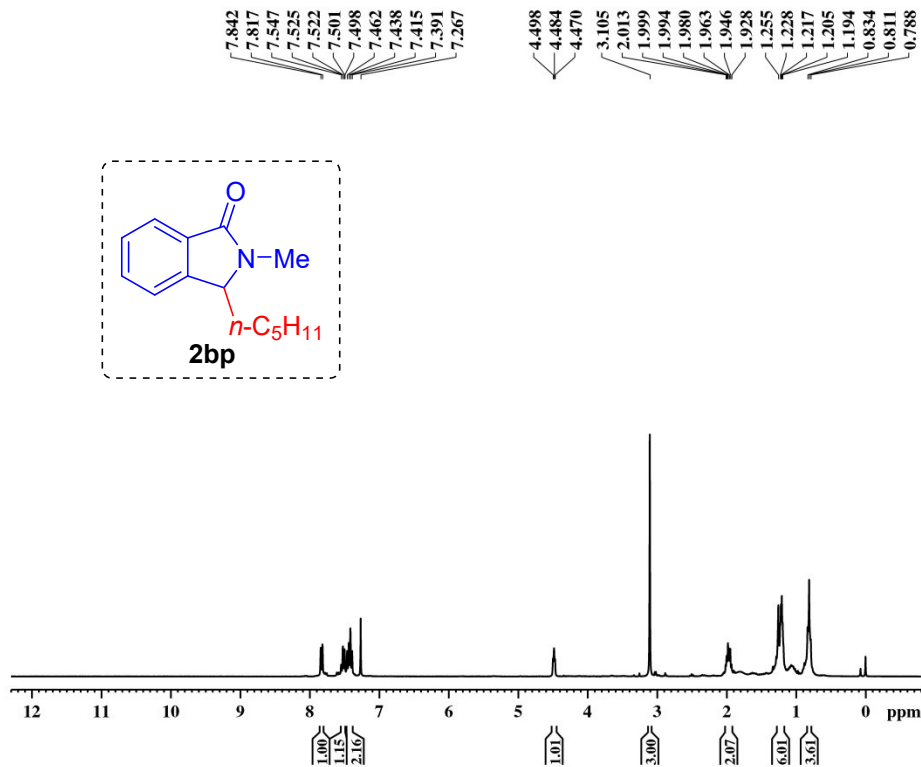

```

Current Data Parameters
NAME      PS-2-348
EXPNO    4
PROCNO   1

F2 - Acquisition Parameters
Date_    20230609
Time     15.21
INSTRUM spect
PROBHD   5 mm DUL 13C-1
PULPROG zg30
TD       65536
SOLVENT  CDCl3
NS       16
DS       2
SWH      6009.615 Hz
FIDRES   0.091699 Hz
AQ       5.4525952 sec
RG       228
DW       83.200 usec
DE       6.50 usec
TE       298.0 K
D1       1.00000000 sec
TDO      1

===== CHANNEL f1 =====
SFO1    300.1318534 MHz
NUC1    1H
P1      12.00 usec
PLW1    12.00000000 W

F2 - Processing parameters
SI      65536
SF      300.1300045 MHz
WDW     EM
SSB     0
LB      0.30 Hz
GB      0
PC      1.00
  
```

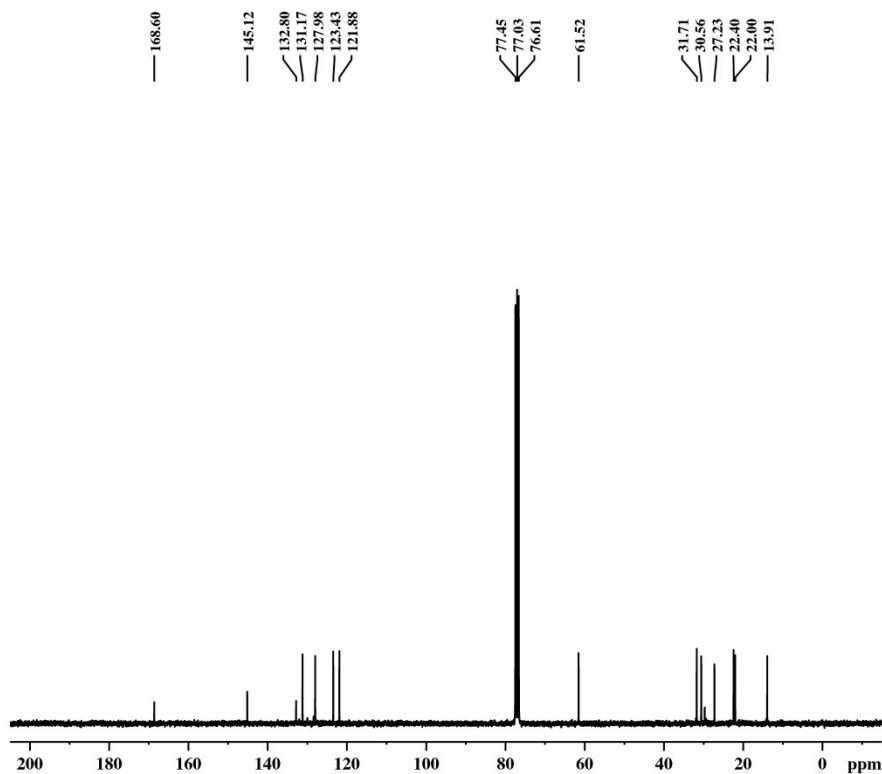

```

Current Data Parameters
NAME      PS-2-348
EXPNO    2
PROCNO   1

F2 - Acquisition Parameters
Date_    20230609
Time     15.57
INSTRUM spect
PROBHD   5 mm DUL 13C-1
PULPROG zgpg30
TD       65536
SOLVENT  CDCl3
NS       1024
DS       4
SWH      18028.846 Hz
FIDRES   0.275098 Hz
AQ       1.8175317 sec
RG       1030
DW       27.733 usec
DE       6.50 usec
TE       300.0 K
D1       2.00000000 sec
D11      0.03000000 sec
TDO      1

===== CHANNEL f1 =====
SFO1    75.4752949 MHz
NUC1    13C
P1      11.00 usec
PLW1    48.00000000 W

===== CHANNEL f2 =====
SFO2    300.1312005 MHz
NUC2    1H
CPDPRG2 waltz16
PCPD2   90.00 usec
PLW2    12.00000000 W
PLW12   0.21333000 W
PLW13   0.10731000 W

F2 - Processing parameters
SI      32768
SF      75.4677485 MHz
WDW     EM
SSB     0
LB      1.00 Hz
GB      0
PC      1.40
  
```

**<sup>1</sup>H and <sup>13</sup>C NMR Spectra of compound 2bo**

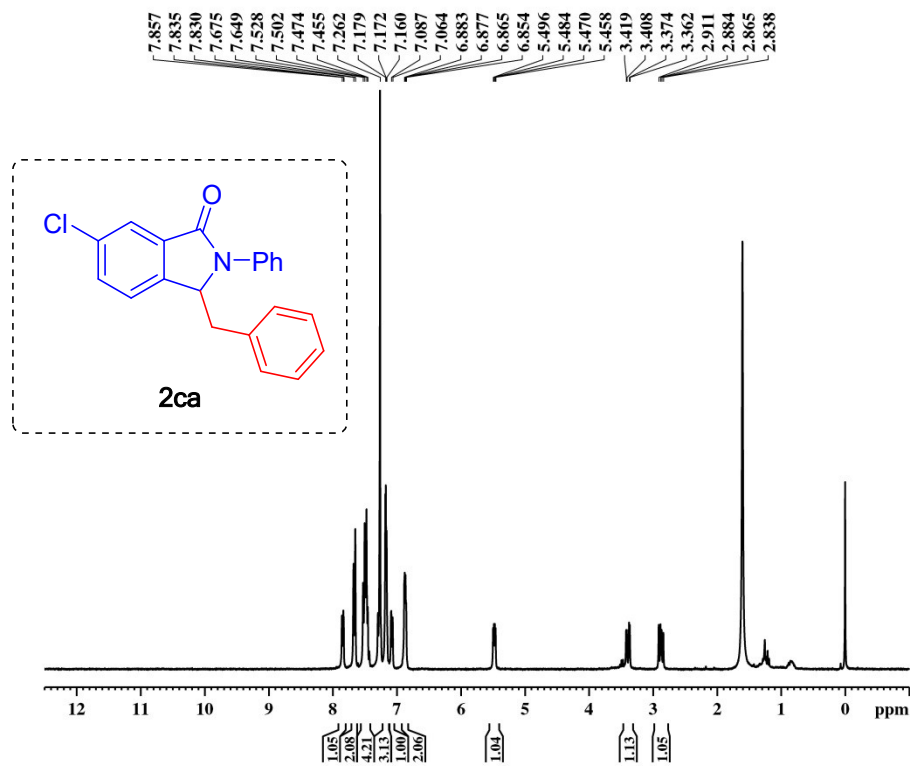

```

Current Data Parameters
NAME      RA-PS-2-242A
EXPNO    1
PROCNO   1

F2 - Acquisition Parameters
Date_    20230203
Time     18.59
INSTRUM  spect
PROBHD   5 mm DUL 13C-1
PULPROG  zg30
TD       65536
SOLVENT  CDCl3
NS       16
DS       2
SWH      6009.615 Hz
FIDRES   0.091699 Hz
AQ       5.4525952 sec
RG       406
DW       83.200 usec
DE       6.50 usec
TE       298.0 K
D1       1.00000000 sec
TD0      1

===== CHANNEL f1 =====
SF01    300.1318534 MHz
NUC1     1H
P1      12.00 usec
PLW1    12.00000000 W

F2 - Processing parameters
SI      65536
SF      300.1300061 MHz
WDW     EM
SSB     0
LB      0.30 Hz
GB      0
PC      1.00
  
```

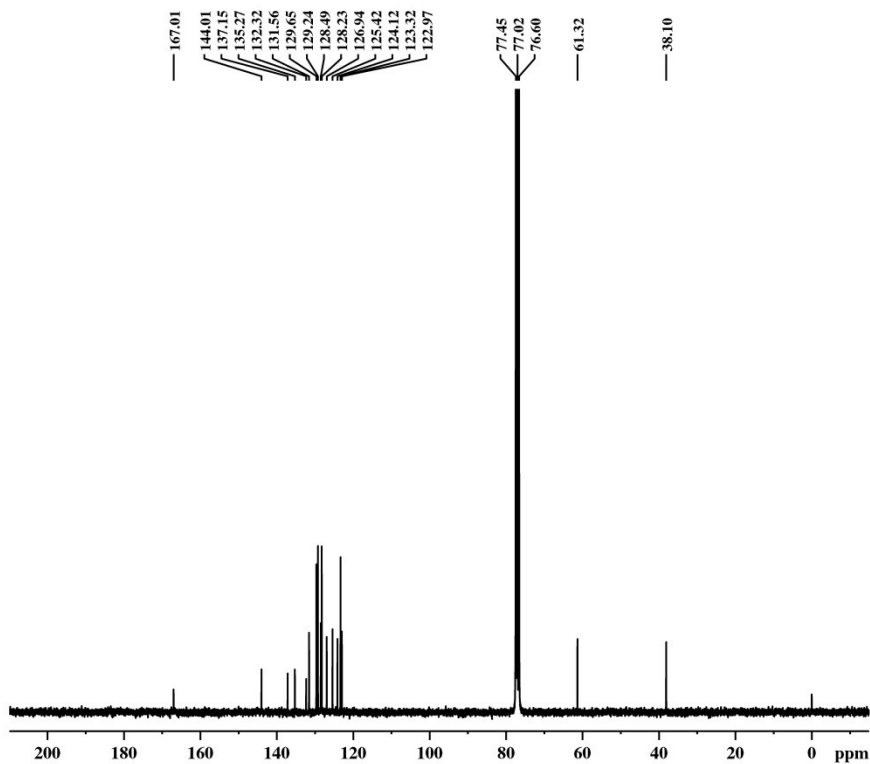

```

Current Data Parameters
NAME      RA-PS-2-242A
EXPNO    4
PROCNO   1

F2 - Acquisition Parameters
Date_    20230204
Time     9.40
INSTRUM  spect
PROBHD   5 mm DUL 13C-1
PULPROG  zgpg30
TD       65536
SOLVENT  CDCl3
NS       9000
DS       4
SWH      18028.846 Hz
FIDRES   0.275098 Hz
AQ       1.8175317 sec
RG       645
DW       27.733 usec
DE       6.50 usec
TE       300.0 K
D1       2.00000000 sec
D11      0.03000000 sec
TD0      1

===== CHANNEL f1 =====
SF01    75.4752949 MHz
NUC1     13C
P1      11.00 usec
PLW1    48.00000000 W

===== CHANNEL f2 =====
SF02    300.1312005 MHz
NUC2     1H
CPDPRG2  waltz16
PCPD2    90.00 usec
PLW2    12.00000000 W
PLW12   0.21333000 W
PLW13   0.10731000 W

F2 - Processing parameters
SI      32768
SF      75.4677485 MHz
WDW     EM
SSB     0
LB      1.00 Hz
GB      0
PC      1.40
  
```

<sup>1</sup>H and <sup>13</sup>C NMR Spectra of compound 2ca

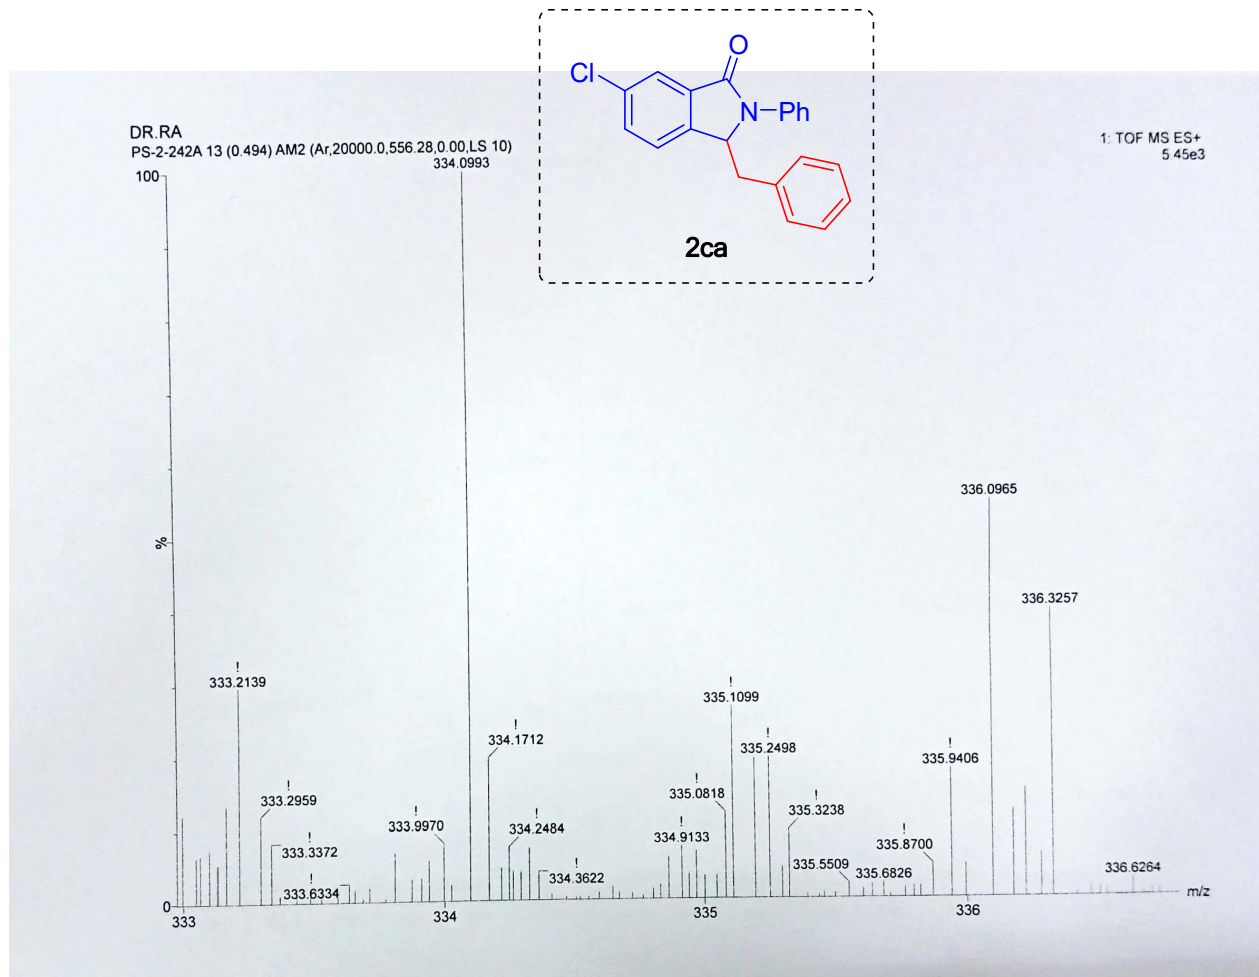

**HRMS Spectrum of compound 2ca**

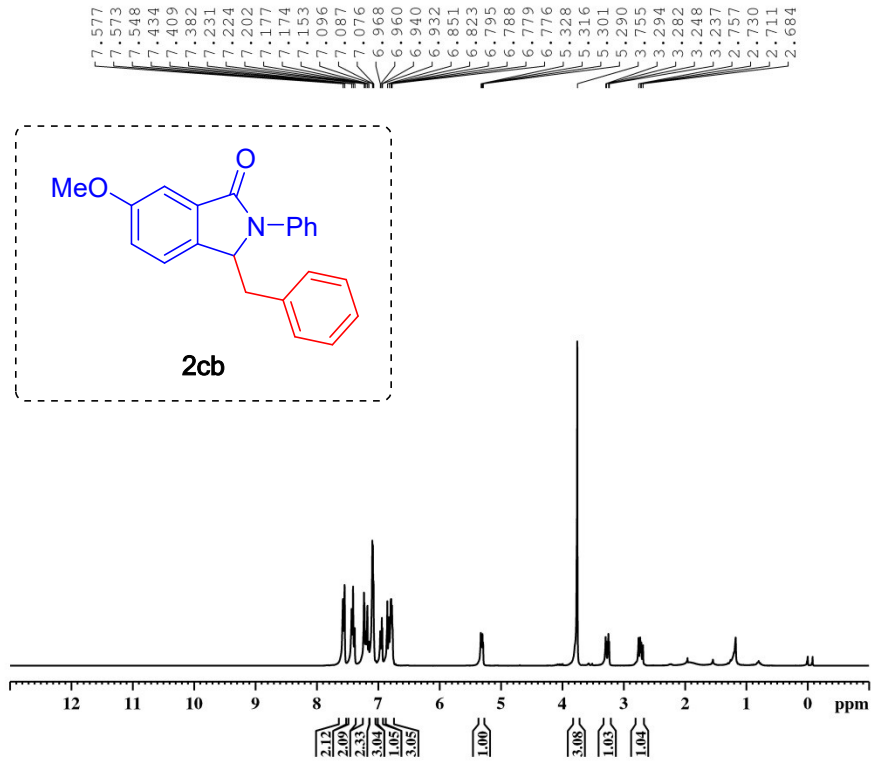

Current Data Parameters  
NAME RA-PS2-242-B  
EXPNO 1  
PROCNO 1

F2 - Acquisition Parameters  
Date\_ 20230202  
Time 23.12  
INSTRUM spect  
PROBHD 5 mm DUL 13C-1  
PULPROG zg30  
TD 65536  
SOLVENT CDCl3  
NS 16  
DS 2  
SWH 6009.615 Hz  
FIDRES 0.091699 Hz  
AQ 5.4525952 sec  
RG 114  
DW 83.200 usec  
DE 6.50 usec  
TE 298.0 K  
D1 1.00000000 sec  
TDO 1

===== CHANNEL f1 =====  
SFO1 300.1318534 MHz  
NUC1 1H  
P1 12.00 usec  
PLW1 12.00000000 W

F2 - Processing parameters  
SI 65536  
SF 300.1300321 MHz  
WDW EM  
SSB 0  
LB 0.30 Hz  
GB 0  
PC 1.00

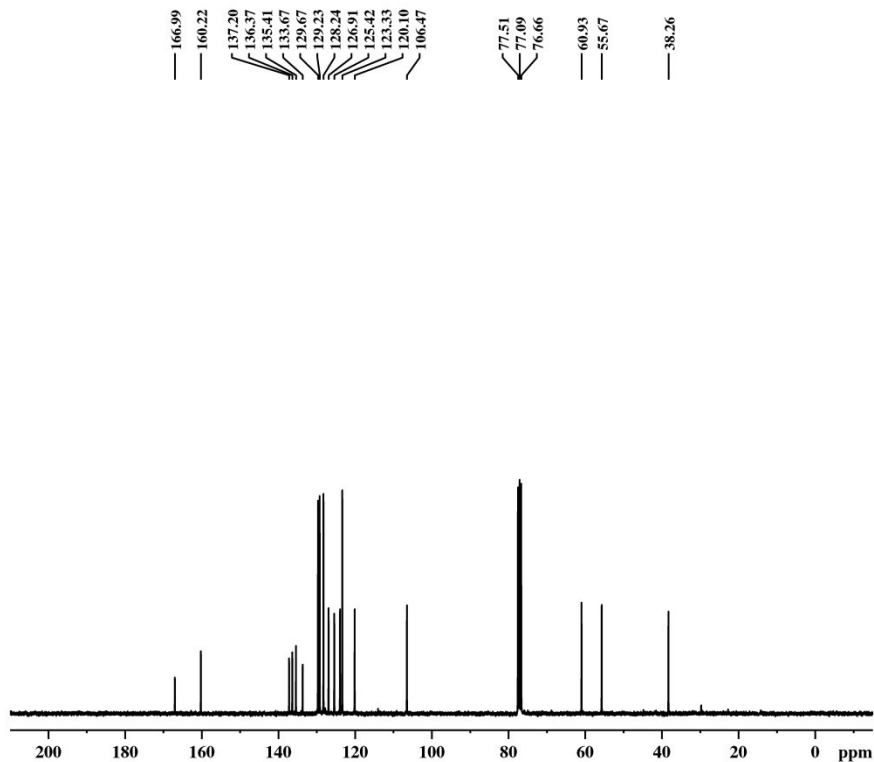

Current Data Parameters  
NAME RA-PS2-242-B  
EXPNO 2  
PROCNO 1

F2 - Acquisition Parameters  
Date\_ 20230203  
Time 0.20  
INSTRUM spect  
PROBHD 5 mm DUL 13C-1  
PULPROG zgpg30  
TD 65536  
SOLVENT CDCl3  
NS 1024  
DS 4  
SWH 18028.846 Hz  
FIDRES 0.275098 Hz  
AQ 1.8175317 sec  
RG 1150  
DW 27.733 usec  
DE 6.50 usec  
TE 300.0 K  
D1 2.00000000 sec  
D11 0.03000000 sec  
TDO 1

===== CHANNEL f1 =====  
SFO1 75.4752949 MHz  
NUC1 13C  
P1 11.00 usec  
PLW1 48.00000000 W

===== CHANNEL f2 =====  
SFO2 300.1312005 MHz  
NUC2 1H  
CPDPRG[2] waltz16  
PCPD2 90.00 usec  
PLW2 12.00000000 W  
PLW12 0.21333000 W  
PLW13 0.10731000 W

F2 - Processing parameters  
SI 32768  
SF 75.4677485 MHz  
WDW EM  
SSB 0  
LB 1.00 Hz  
GB 0  
PC 1.40

<sup>1</sup>H and <sup>13</sup>C NMR Spectra of compound 2cb

DR.RA

PS-2-242B 4 (0.164) AM2 (Ar,20000.0,556.28,0.00,LS-10)

1: TOF MS ES+  
6 85e5

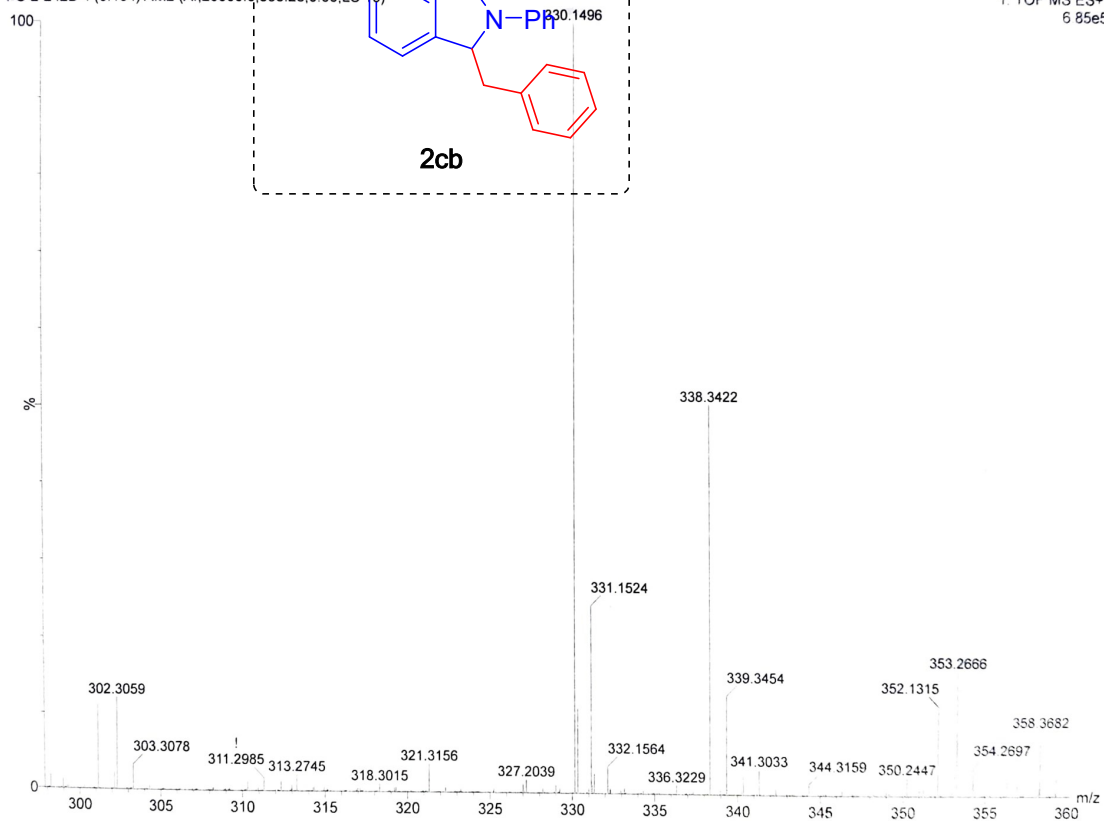

**HRMS Spectrum of compound 2cb**



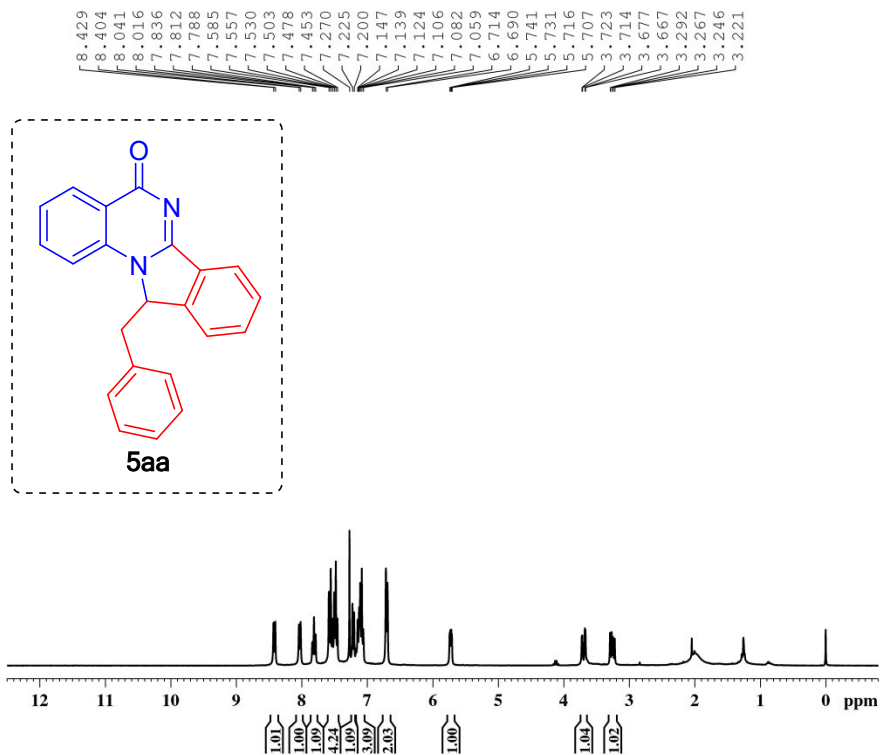

```

Current Data Parameters
NAME          PS-2-337
EXPNO         4
PROCNO        1

F2 - Acquisition Parameters
Date_         20230517
Time          7.23
INSTRUM      spect
PROBHD       5 mm DUL 13C-1
PULPROG      zg30
TD           65536
SOLVENT      CDCl3
NS           32
DS           2
SWH          6009.615 Hz
FIDRES       0.091699 Hz
AQ           5.4525952 sec
RG           228
DW           83.200 usec
DE           6.50 usec
TE           298.0 K
D1           1.00000000 sec
TDO          1

===== CHANNEL f1 =====
SFO1         300.1318534 MHz
NUC1          1H
P1           12.00 usec
PLW1         12.00000000 W

F2 - Processing parameters
SI           65536
SF           300.1300035 MHz
WDW          EM
SSB          0
LB           0.30 Hz
GB           0
PC           1.00

```

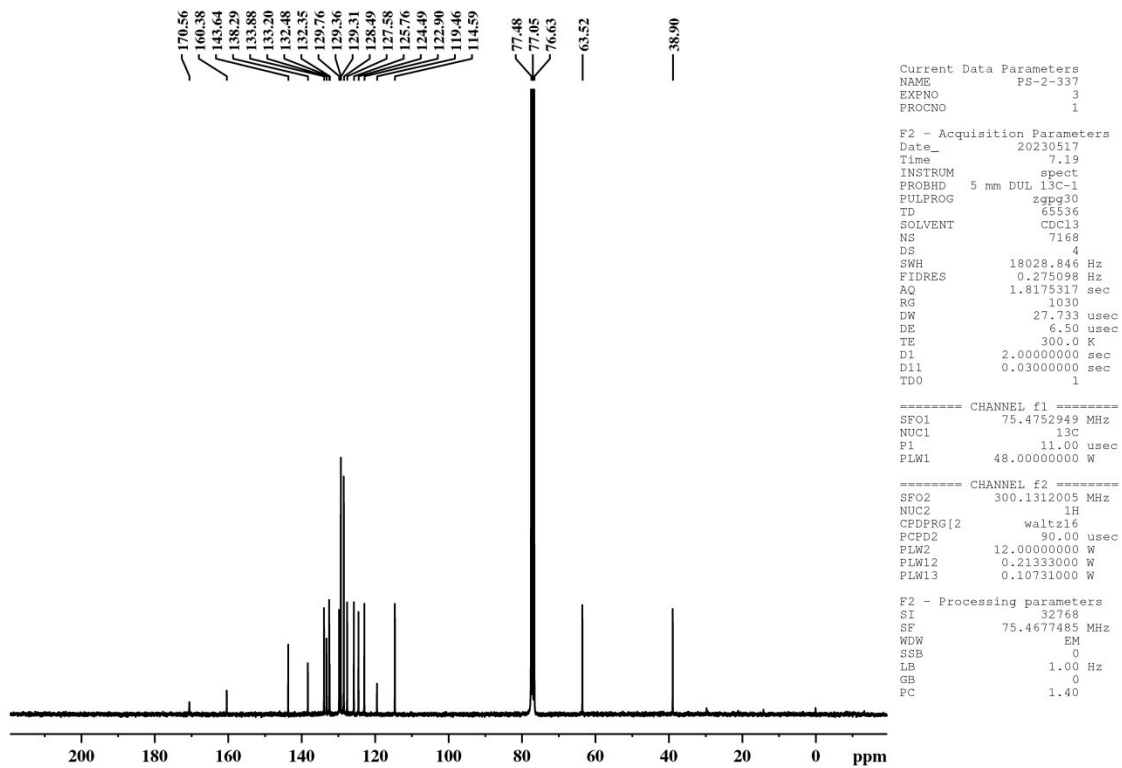

**<sup>1</sup>H and <sup>13</sup>C NMR Spectra of compound 5aa**

DR.RA  
BR-05-132 14 (0.531) AM2 (Ar.20000.0,556.28,0.00,LS 10)

1: TOF MS ES+  
4.83e5

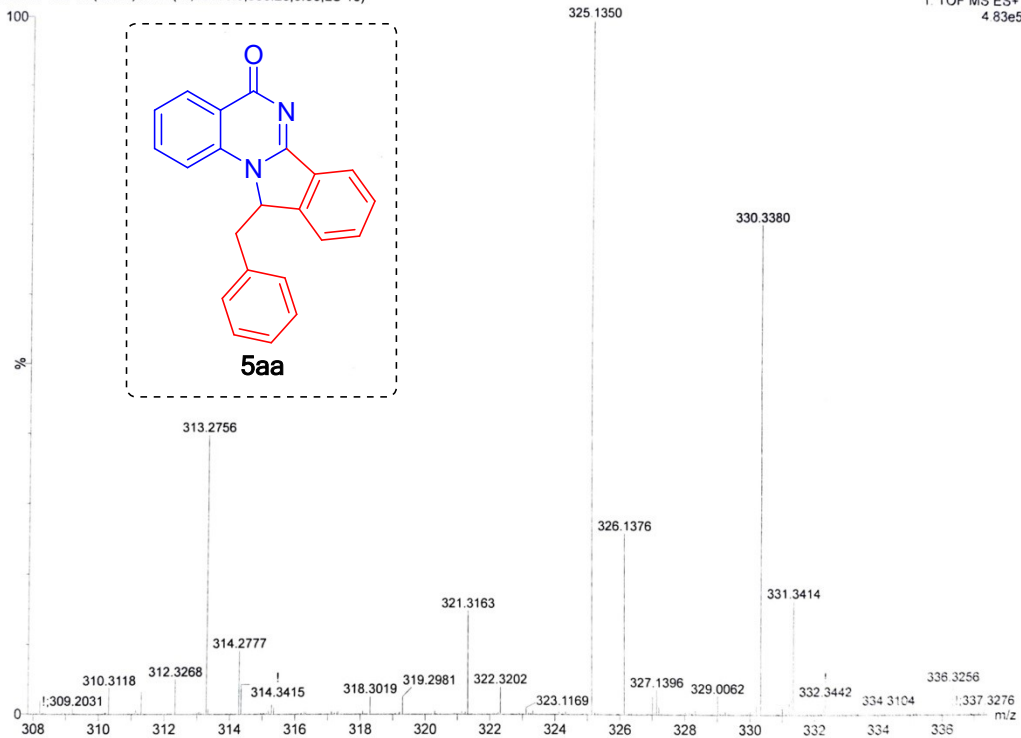

**HRMS Spectrum of compound 5aa**

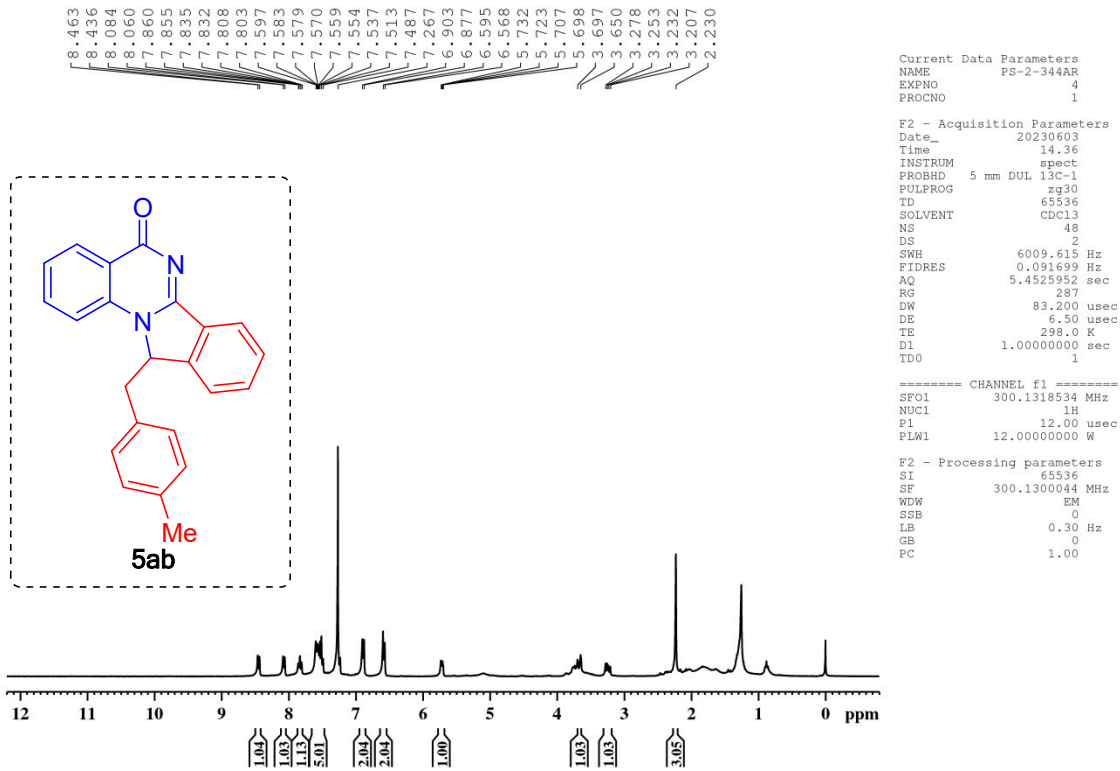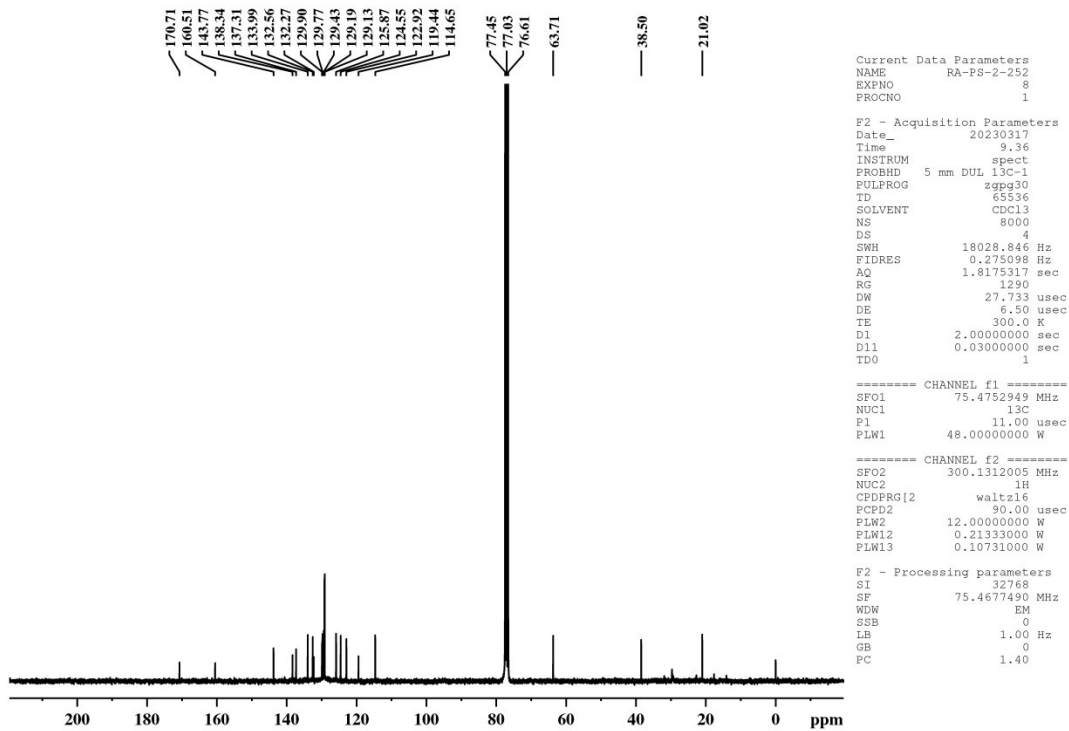

**<sup>1</sup>H and <sup>13</sup>C NMR Spectra of compound 5ab**

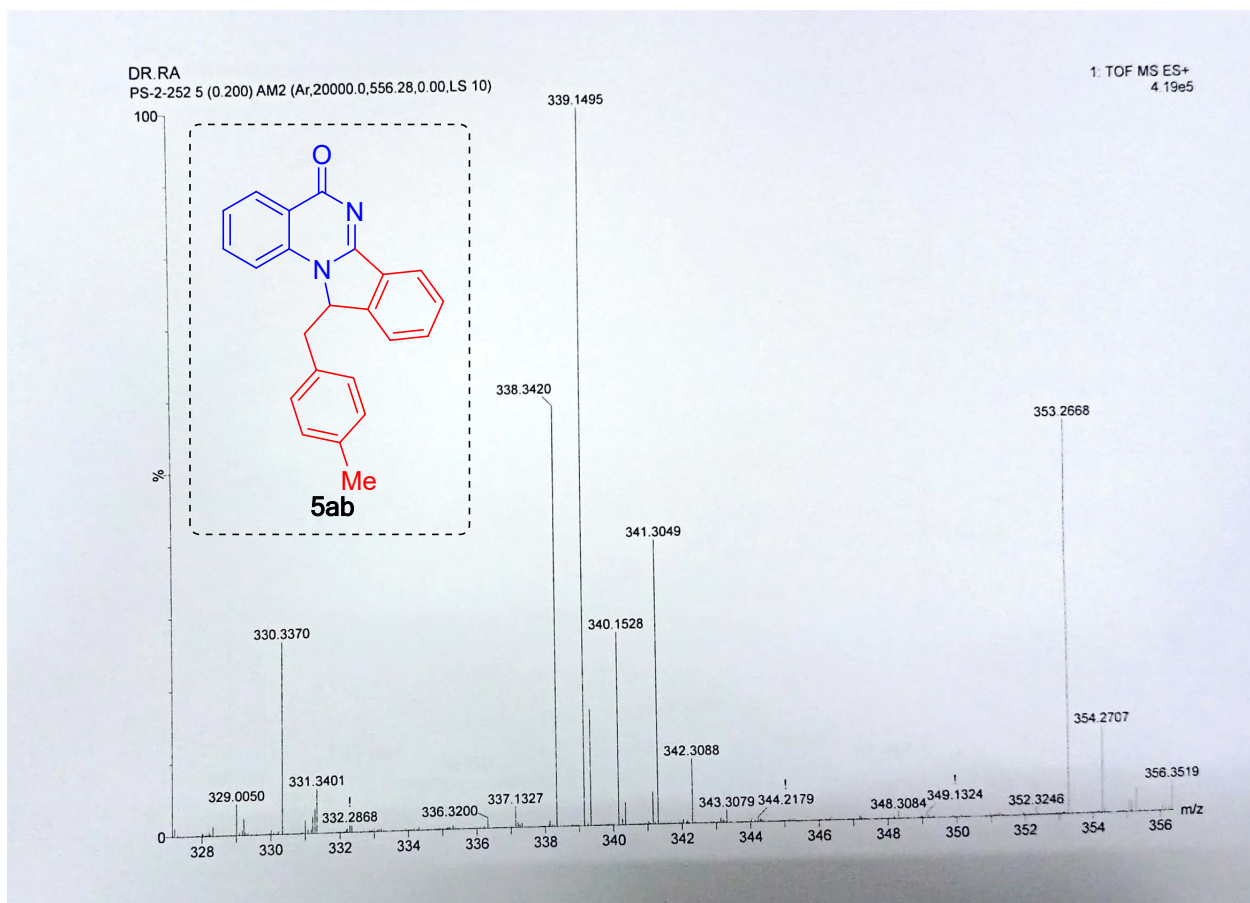

**HRMS Spectrum of compound 5ab**

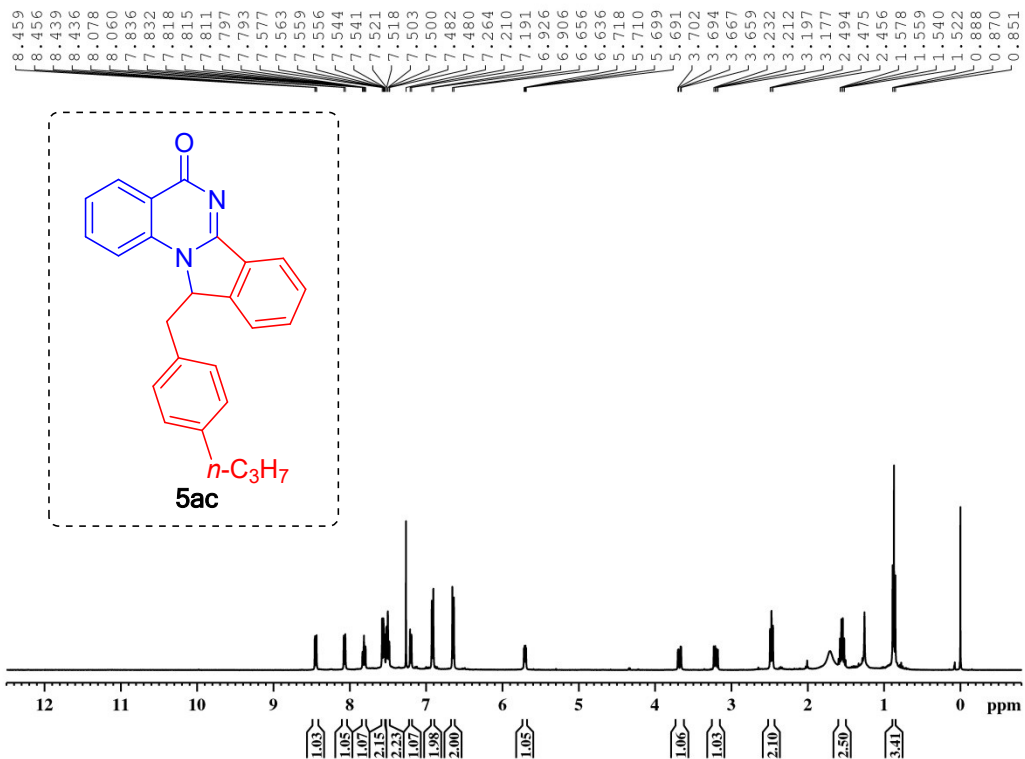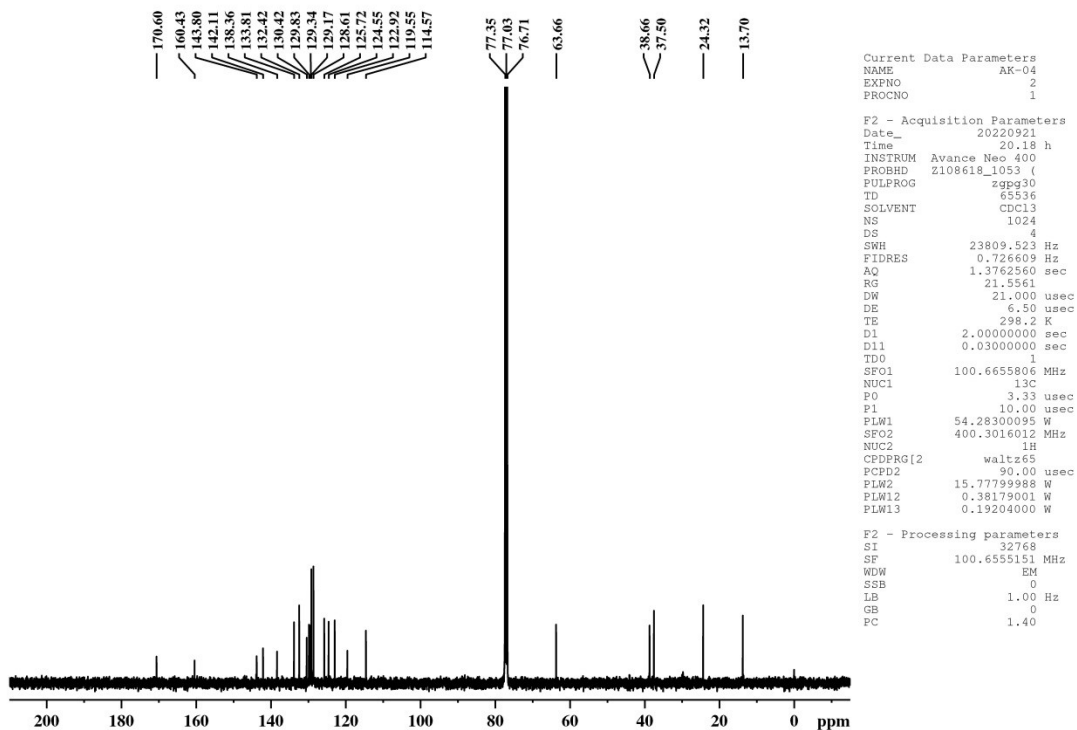

<sup>1</sup>H and <sup>13</sup>C NMR Spectra of compound 5ac

|             |          |                        |         |                 |                      |
|-------------|----------|------------------------|---------|-----------------|----------------------|
| Sample Name | ps-1-275 | Position               | P1-A7   | Instrument Name | Instrument 1         |
| User Name   |          | Inj Vol                | 2       | InjPosition     |                      |
| Sample Type | Sample   | IRM Calibration Status | Success | Data Filename   | 17.06.2022-7.d       |
| ACQ Method  | NITW-W.m | Comment                |         | Acquired Time   | 17-Jun-22 3:28:55 PM |

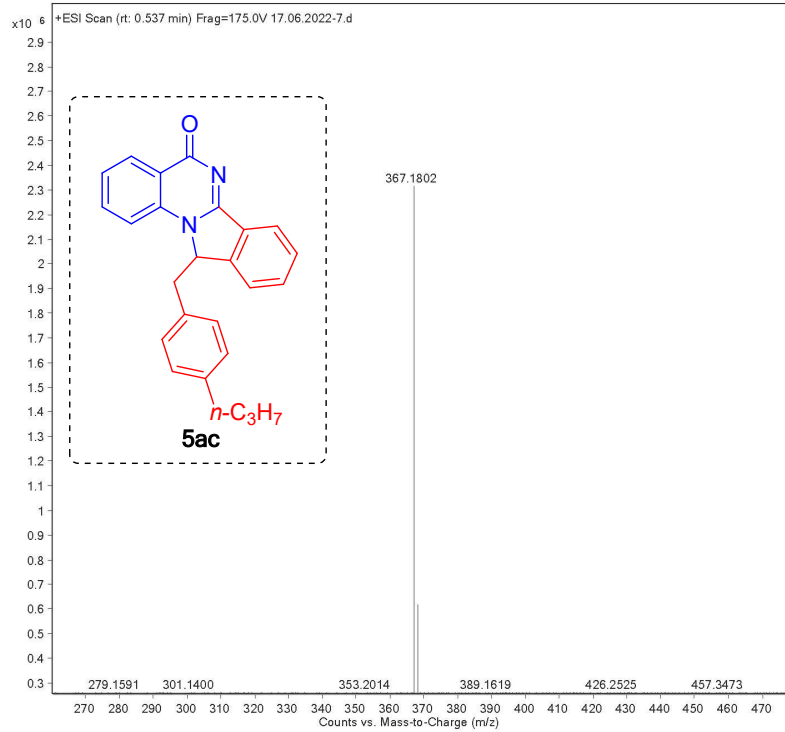

**HRMS Spectrum of compound 5ac**

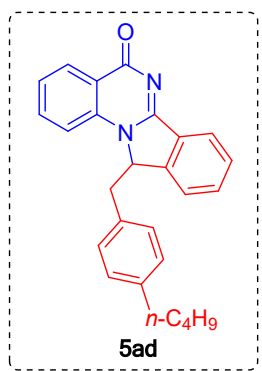

8.403  
8.387  
8.026  
8.011  
7.810  
7.795  
7.780  
7.568  
7.552  
7.539  
7.524  
7.480  
7.465  
7.450  
7.273  
7.204  
7.189  
6.904  
6.889  
6.619  
6.604  
5.695  
5.685  
3.670  
3.665  
3.640  
3.637  
3.208  
3.192  
3.180  
3.165  
2.496  
2.481  
2.466  
1.523  
1.508  
1.493  
1.478  
1.463  
1.296  
1.281  
1.266  
1.253  
0.897  
0.882  
0.867

```

Current Data Parameters
NAME      mjm
EXPNO    45
PROCNO   1

F2 - Acquisition Parameters
Date_    20221012
Time     13.54
INSTRUM  spect
PROBHD   5 mm PABBO BB/
PULPROG  zg30
TD        32768
SOLVENT  CDCl3
NS        32
DS        2
SWH       10000.000 Hz
FIDRES    0.305176 Hz
AQ         1.6384000 sec
RG         79.04
DW         50.000 usec
DE         6.50 usec
TE         297.9 K
D1         0.50000000 sec
TD0        1

===== CHANNEL f1 =====
SF01     500.1525008 MHz
NUC1      1H
P1        11.75 usec
PLW1     15.30000019 W

F2 - Processing parameters
SI        65536
SF        500.1500056 MHz
WDW       EM
SSB       0
LB        0.30 Hz
GB        0
PC        1.00
  
```

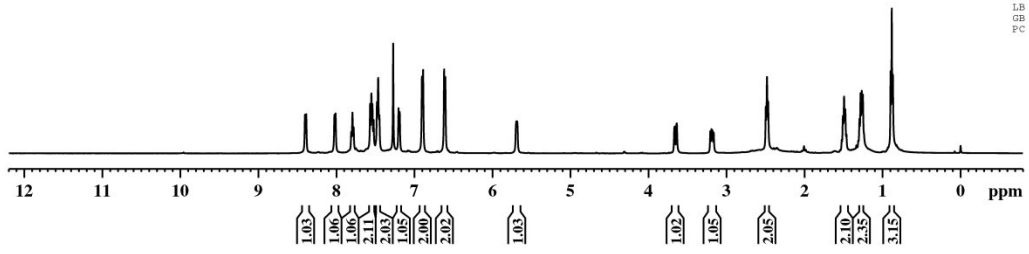

170.54  
160.37  
143.85  
142.28  
138.28  
133.89  
132.46  
130.31  
129.65  
129.28  
128.15  
125.74  
124.44  
122.96  
119.42  
114.70  
77.32  
77.06  
76.81  
63.70  
38.58  
35.10  
33.56  
22.26  
13.91

```

Current Data Parameters
NAME      mjm
EXPNO    46
PROCNO   1

F2 - Acquisition Parameters
Date_    20221012
Time     14.09
INSTRUM  spect
PROBHD   5 mm PABBO BB/
PULPROG  zgpg30
TD        20480
SOLVENT  CDCl3
NS        512
DS        4
SWH       29761.904 Hz
FIDRES    1.453218 Hz
AQ         0.3440640 sec
RG         202.34
DW         16.800 usec
DE         6.50 usec
TE         298.6 K
D1         1.00000000 sec
D11        0.03000000 sec
TD0        1

===== CHANNEL f1 =====
SF01     125.7753932 MHz
NUC1      13C
P1        10.20 usec
PLW1     103.00000000 W

===== CHANNEL f2 =====
SF02     500.1520006 MHz
NUC2      1H
CPDPRG2  waltz16
PCPD2    80.00 usec
PLW2     15.30000019 W
PLW12    0.39658999 W
PLW13    0.19948000 W

F2 - Processing parameters
SI        32768
SF        125.7628180 MHz
WDW       EM
SSB       0
LB        1.00 Hz
GB        0
PC        1.40
  
```

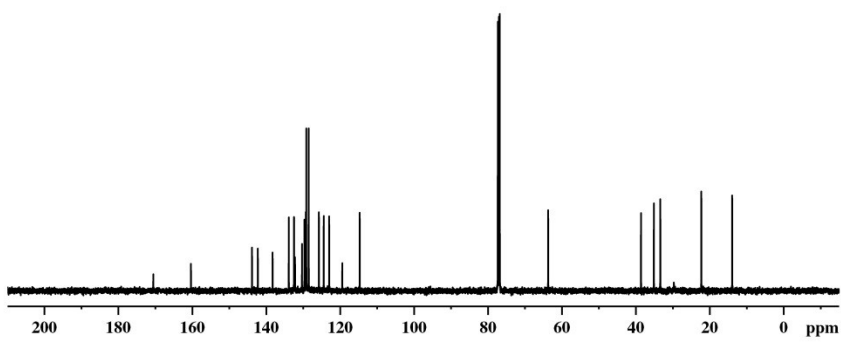

**<sup>1</sup>H and <sup>13</sup>C NMR Spectra of compound 5ad**



|             |          |                        |         |                 |                      |
|-------------|----------|------------------------|---------|-----------------|----------------------|
| Sample Name | ps-1-276 | Position               | P1-A8   | Instrument Name | Instrument 1         |
| User Name   |          | Inj Vol                | 2       | InjPosition     |                      |
| Sample Type | Sample   | IRM Calibration Status | Success | Data Filename   | 17.06.2022-8.d       |
| ACQ Method  | NITW-W.m | Comment                |         | Acquired Time   | 17-Jun-22 3:32:54 PM |

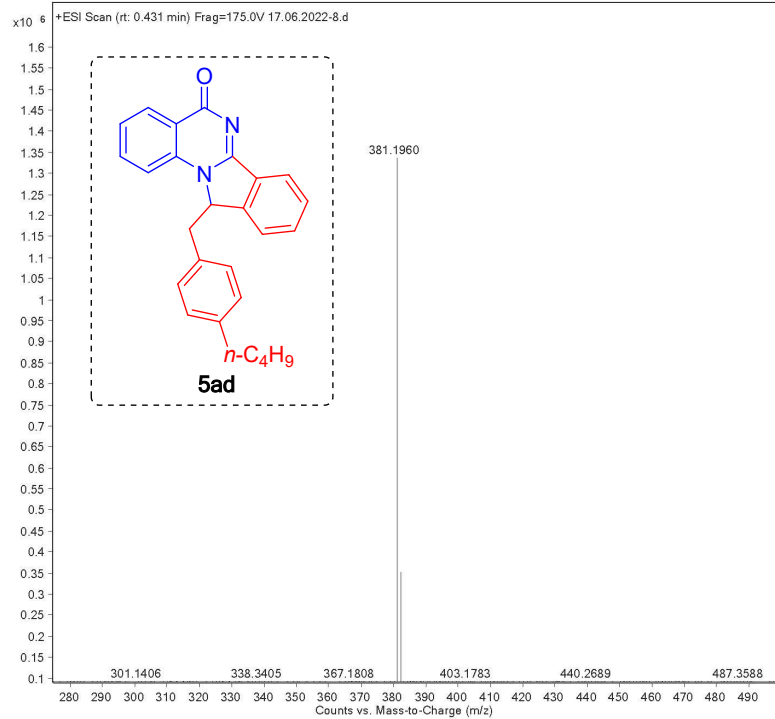

**HRMS Spectrum of compound 5ad**

8.356  
8.330  
7.971  
7.946  
7.808  
7.783  
7.757  
7.586  
7.558  
7.535  
7.531  
7.476  
7.453  
7.429  
7.405  
7.281  
7.256  
7.043  
7.018  
6.995  
6.971  
6.827  
6.800  
6.775  
6.422  
6.397  
6.368  
6.336  
5.749  
5.725  
5.717  
5.668  
3.663  
3.622  
3.617  
3.340  
3.316  
3.294

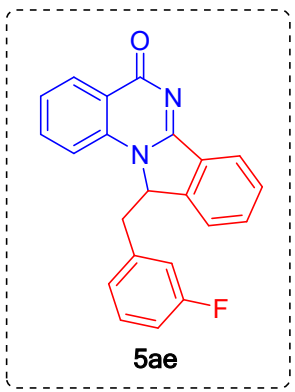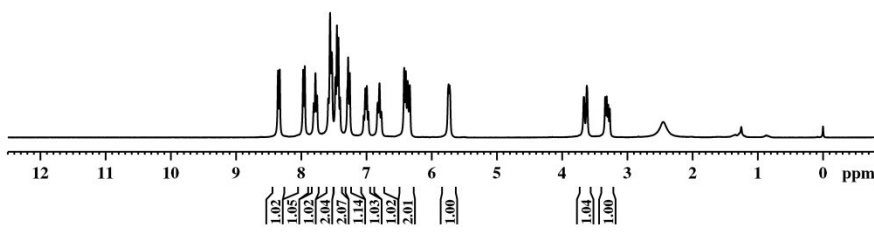

```
Current Data Parameters
NAME      PS-2-31
EXPNO    3
PROCNO   1

F2 - Acquisition Parameters
Date_    20230425
Time     11.46
INSTRUM  spect
PROBHD   5 mm DUL 13C-1
PULPROG  zg30
TD       65536
SOLVENT  CDCl3
NS       16
DS       2
SWH      6009.615 Hz
FIDRES   0.091699 Hz
AQ       5.452592 sec
RG       128
DW       83.200 usec
DE       6.50 usec
TE       298.0 K
D1       1.00000000 sec
TDO      1

===== CHANNEL f1 =====
SF01    300.1318534 MHz
NUC1     1H
P1      12.00 usec
PLW1    12.00000000 W

F2 - Processing parameters
SI      65536
SF      300.1299967 MHz
WDW     EM
SSB     0
LB      0.30 Hz
GB      0
PC      1.00
```

170.37  
163.89  
160.71  
160.26  
143.31  
138.10  
135.58  
135.48  
133.97  
132.66  
132.22  
130.01  
129.91  
129.60  
129.45  
125.79  
124.96  
124.93  
124.39  
122.80  
119.28  
116.43  
116.14  
114.66  
114.56  
114.39  
77.54  
77.12  
76.69  
63.11  
38.39

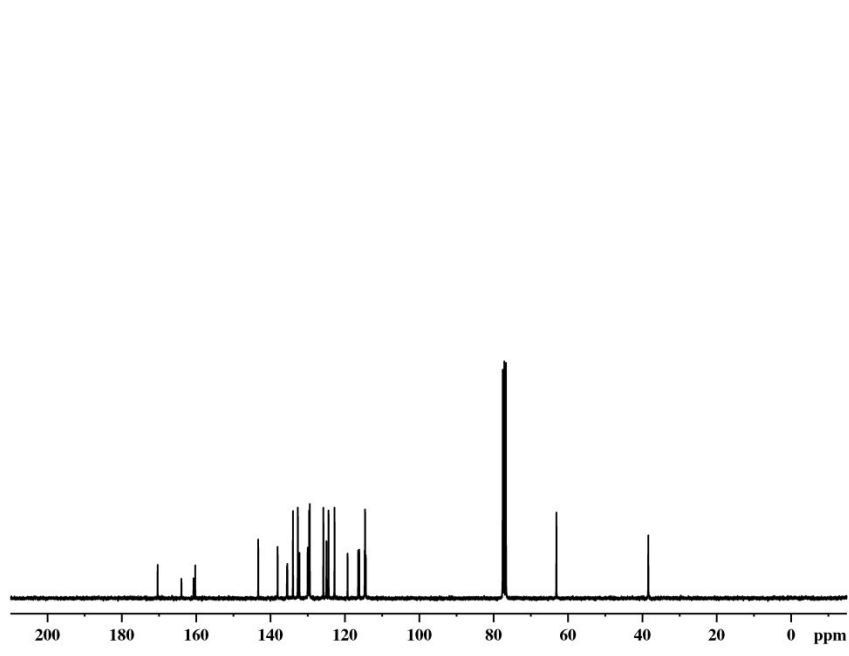

```
Current Data Parameters
NAME      PS-2-31
EXPNO    2
PROCNO   1

F2 - Acquisition Parameters
Date_    20230425
Time     11.43
INSTRUM  spect
PROBHD   5 mm DUL 13C-1
PULPROG  zgpg30
TD       65536
SOLVENT  CDCl3
NS       1024
DS       4
SWH      18028.846 Hz
FIDRES   0.275098 Hz
AQ       1.8175317 sec
RG       1030
DW       27.733 usec
DE       6.50 usec
TE       300.0 K
D1       2.00000000 sec
D11      0.03000000 sec
TDO      1

===== CHANNEL f1 =====
SF01    75.4752949 MHz
NUC1     13C
P1      11.00 usec
PLW1    48.00000000 W

===== CHANNEL f2 =====
SF02    300.1312005 MHz
NUC2     1H
CPDPRG[2] waltz16
PCPD2   90.00 usec
PLW2    12.00000000 W
PLW12   0.21333000 W
PLW13   0.10731000 W

F2 - Processing parameters
SI      32768
SF      75.4677485 MHz
WDW     EM
SSB     0
LB      1.00 Hz
GB      0
PC      1.40
```

**<sup>1</sup>H and <sup>13</sup>C NMR Spectra of compound 5ae**

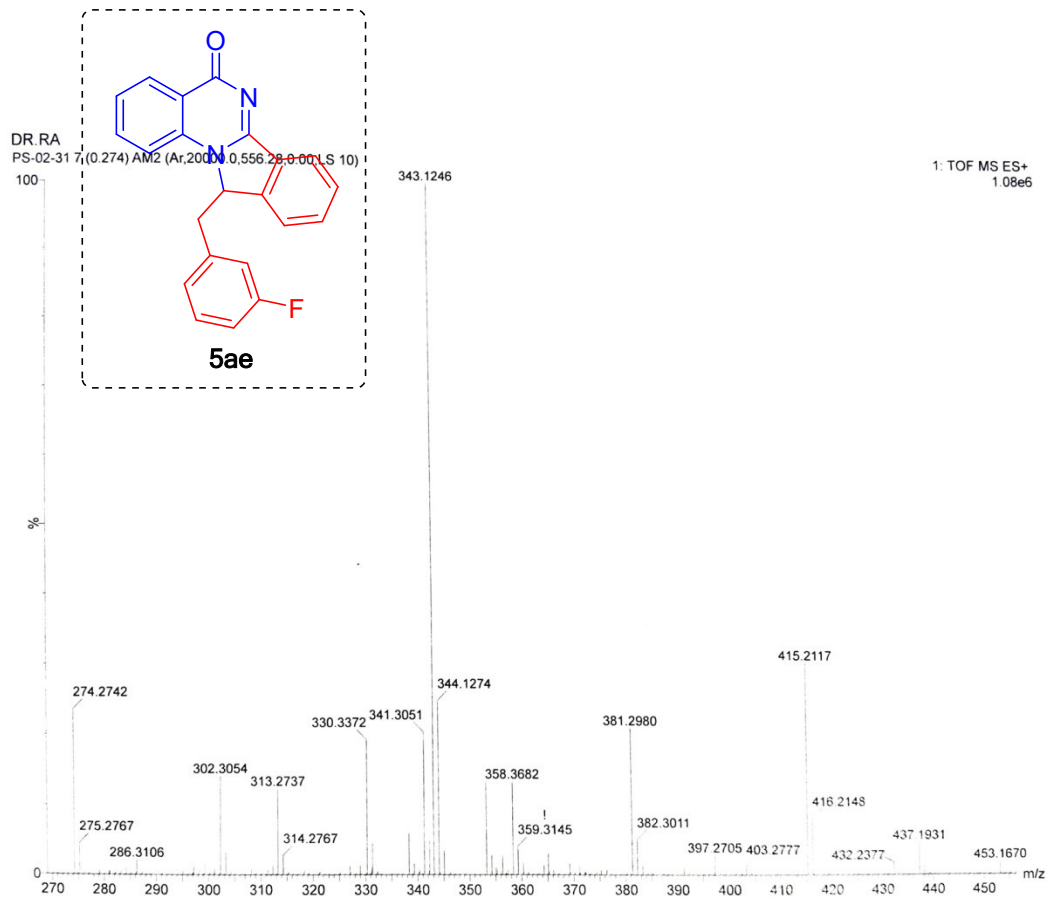

**HRMS Spectrum of compound 5ae**

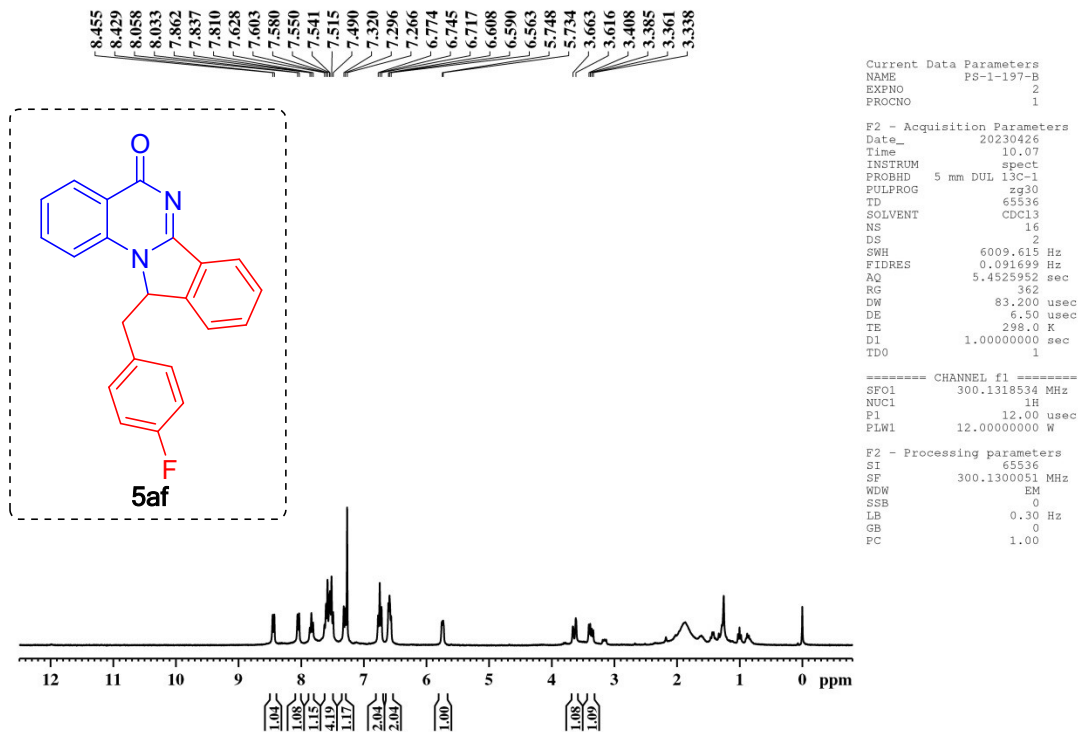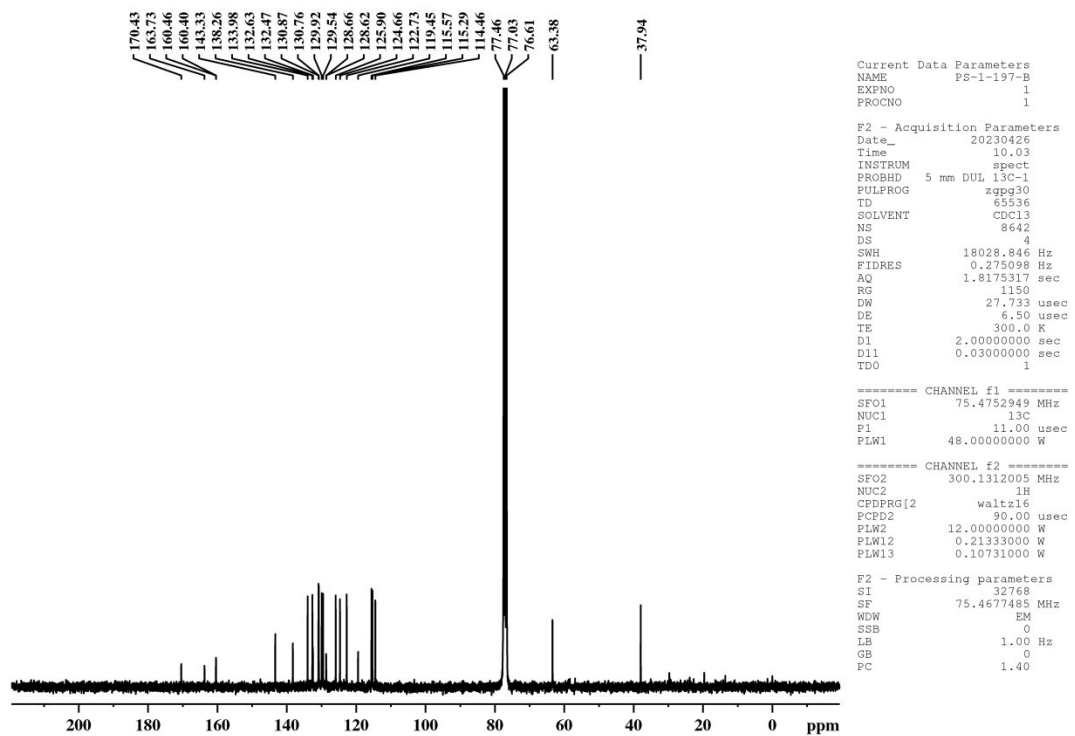

**<sup>1</sup>H and <sup>13</sup>C NMR Spectra of compound 5af**

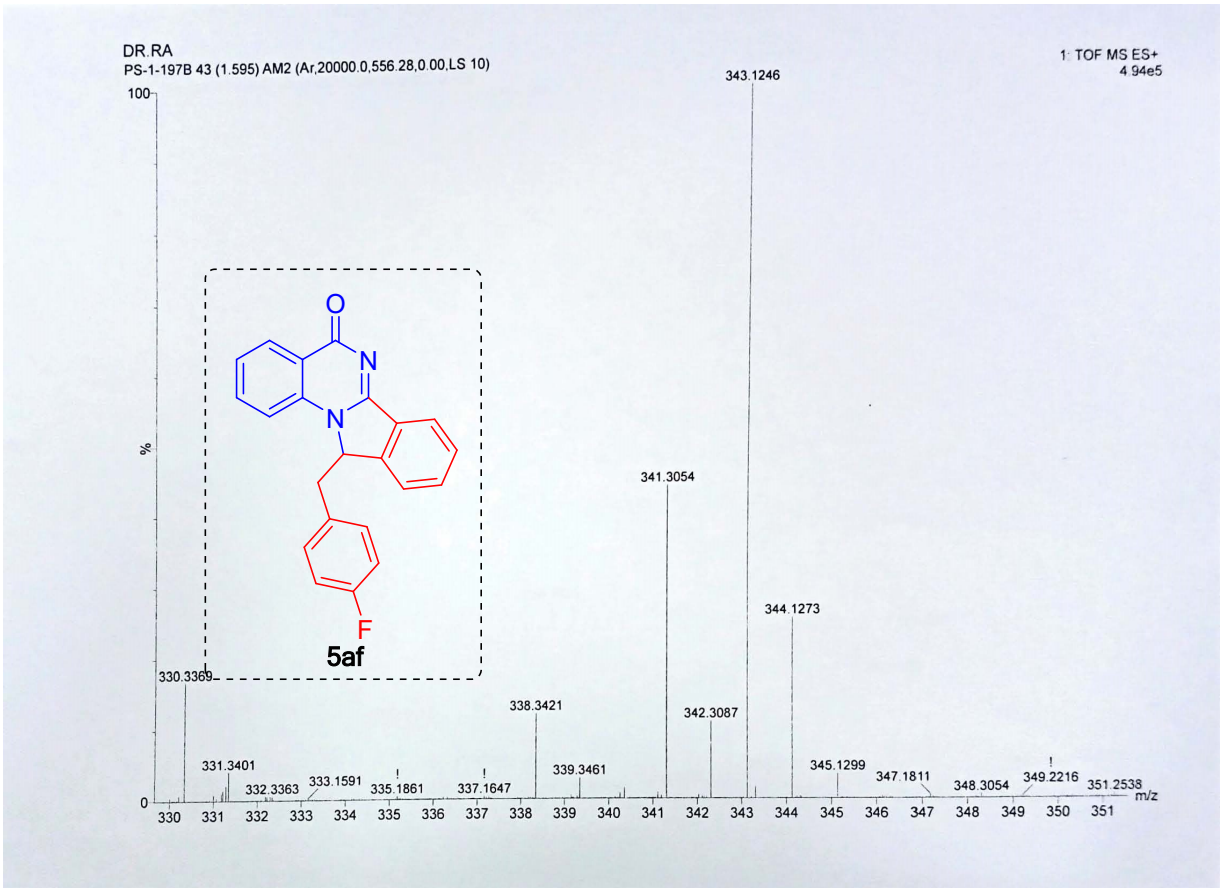

**HRMS Spectrum of compound 5af**

8.423  
8.420  
8.403  
8.400  
7.999  
7.980  
7.851  
7.847  
7.830  
7.812  
7.809  
7.640  
7.639  
7.622  
7.620  
7.603  
7.559  
7.538  
7.526  
7.519  
7.507  
7.499  
7.488  
7.481  
7.364  
7.345  
7.321  
7.300  
7.271  
7.270  
6.688  
5.818  
5.811  
5.802  
5.795  
3.700  
3.693  
3.665  
3.658  
3.565  
3.548  
3.530  
3.513

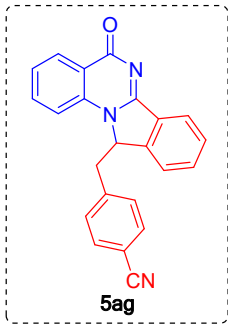

```

Current Data Parameters
NAME          AK-06
EXPNO         1
PROCNO        1

F2 - Acquisition Parameters
Date_         20220921
Time          22:32 h
INSTRUM      Avance Neo 400
PROBHD       Z108618_1053 (
PULPROG      zgpg30
TD            65536
SOLVENT      CDCl3
NS            16
DS            2
SWH           8196.722 Hz
FIDRES        0.250144 Hz
AQ            3.9976959 sec
RG            101
DW            61.000 usec
DE            12.86 usec
TE            298.1 K
D1            1.00000000 sec
TD0           1
SFO1          400.1024719 MHz
NUC1          1H
P0            4.67 usec
P1            14.00 usec
PLW1          15.77799988 W

F2 - Processing parameters
SI            65536
SF            400.1000058 MHz
WDW           EM
SSB           0
LB            0.30 Hz
GB            0
PC            1.00
  
```

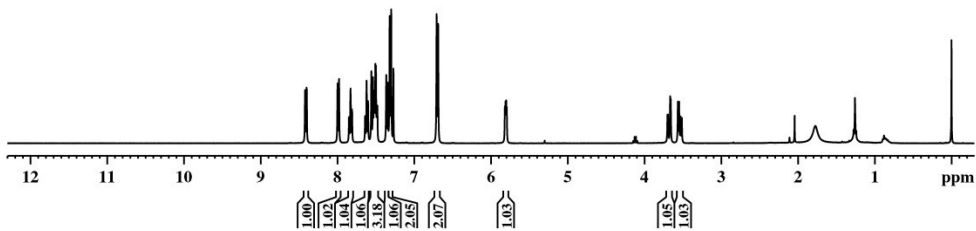

170.16  
160.24  
142.72  
138.41  
138.07  
134.08  
132.82  
132.44  
132.06  
130.07  
130.00  
129.77  
126.01  
124.72  
122.57  
119.38  
118.17  
114.29  
111.68  
77.36  
77.05  
76.73  
62.69  
38.59

```

Current Data Parameters
NAME          AK-06
EXPNO         2
PROCNO        1

F2 - Acquisition Parameters
Date_         20220921
Time          23:32 h
INSTRUM      Avance Neo 400
PROBHD       Z108618_1053 (
PULPROG      zgpg30
TD            65536
SOLVENT      CDCl3
NS            1024
DS            4
SWH           23809.523 Hz
FIDRES        0.726609 Hz
AQ            1.3762560 sec
RG            22.0052
DW            21.000 usec
DE            6.50 usec
TE            298.1 K
D1            2.00000000 sec
D11           0.03000000 sec
TD0           1
SFO1          100.6555806 MHz
NUC1          13C
P0            3.33 usec
P1            10.00 usec
PLW1          54.28300095 W
SFO2          400.3016012 MHz
NUC2          1H
CPDPRG[2]    waltz65
PCPD2         90.00 usec
PLN2          15.77799988 W
PLN12         0.38179001 W
PLW13         0.19204000 W

F2 - Processing parameters
SI            32768
SF            100.6555151 MHz
WDW           EM
SSB           0
LB            1.00 Hz
GB            0
PC            1.40
  
```

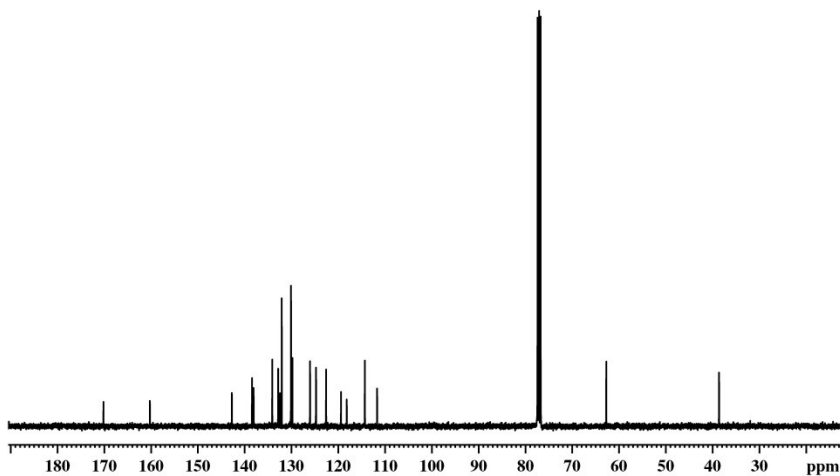

<sup>1</sup>H and <sup>13</sup>C NMR Spectra of compound 5ag

DR.RA  
PS-2-63 3 (0.127) AM2 (Ar,20000.0,556.28,0.00,LS 10)

1. TOF MS ES+  
3.97e5

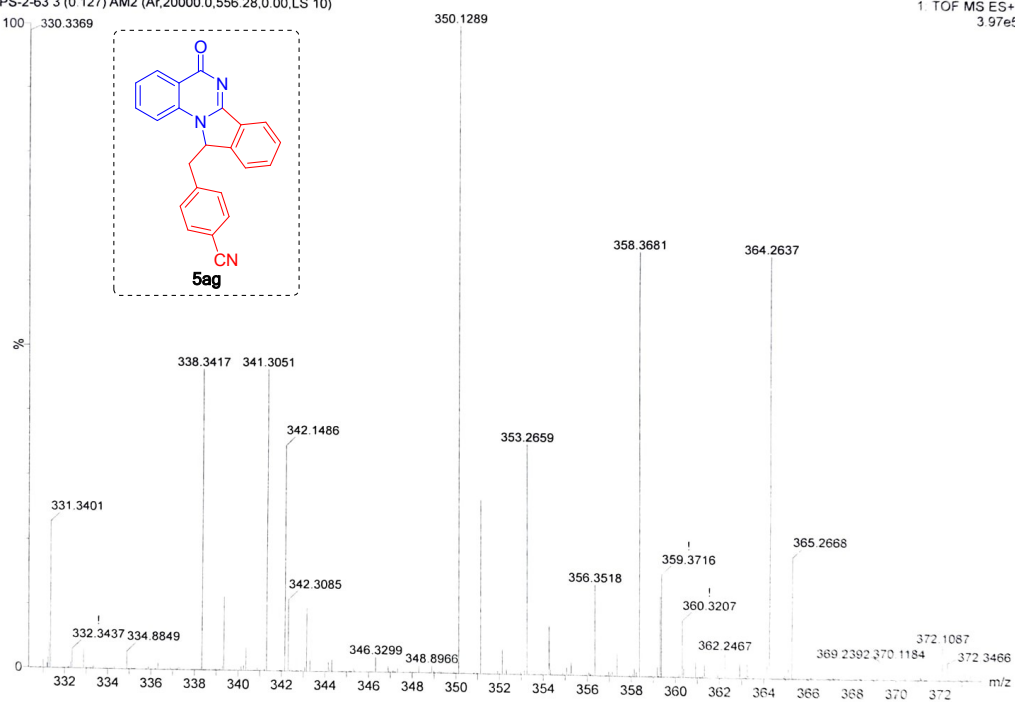

**HRMS Spectrum of compound 5ag**

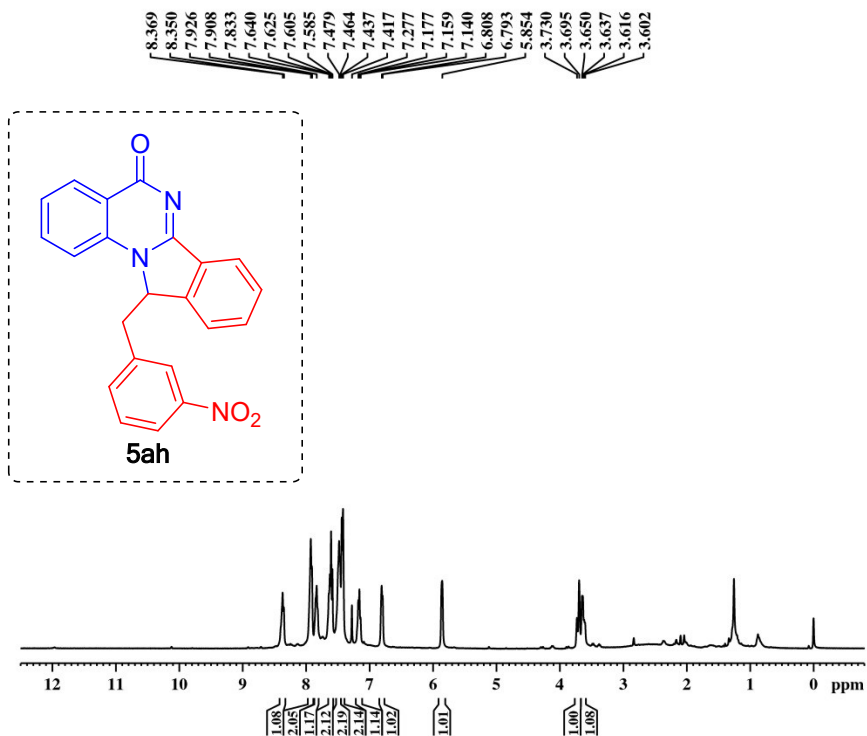

```

Current Data Parameters
NAME      prabu
EXPNO    323
PROCNO   1

F2 - Acquisition Parameters
Date_    20220730
Time     5.26 h
INSTRUM  spect
PROBHD   Z129392_0001 (
PULPROG  zg30
TD       65536
SOLVENT  CDCl3
NS       16
DS       2
SWH      8012.820 Hz
FIDRES   0.244532 Hz
AQ       4.0894465 sec
RG       153.13
DW       62.400 usec
DE       6.50 usec
TE       300.5 K
D1       0.50000000 sec
TD0      1
SF01     400.1320007 MHz
NUC1     1H
P1       15.00 usec
PLW1     10.50000000 W

F2 - Processing parameters
SI       65536
SF       400.1300024 MHz
WDW      EM
SSB      0
LB       0.30 Hz
GB       0
PC       1.00
  
```

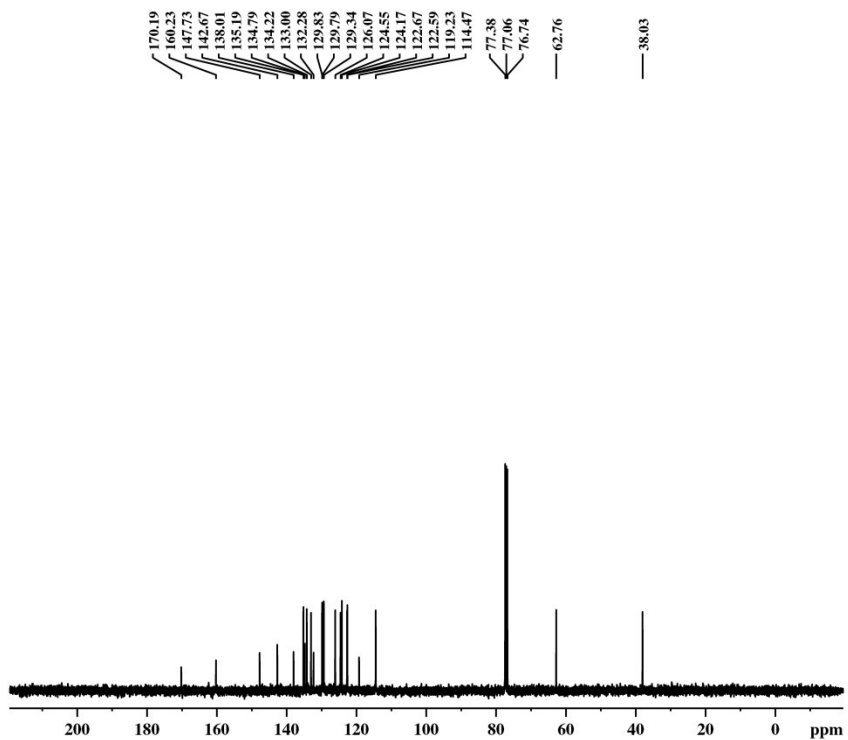

```

Current Data Parameters
NAME      prabu
EXPNO    286
PROCNO   1

F2 - Acquisition Parameters
Date_    20220723
Time     22.38 h
INSTRUM  spect
PROBHD   Z129392_0001 (
PULPROG  zgpg30
TD       16540
SOLVENT  CDCl3
NS       256
DS       4
SWH      24038.461 Hz
FIDRES   2.906706 Hz
AQ       0.3440320 sec
RG       200.34
DW       20.800 usec
DE       6.50 usec
TE       301.1 K
D1       1.00000000 sec
D11      0.03000000 sec
TD0      1
SF01     100.6228289 MHz
NUC1     13C
P1       10.00 usec
PLW1     47.00000000 W
SFO2     400.1316005 MHz
NUC2     1H
CPDPRG[2] waltz16
PCPD2    90.00 usec
PLW2     10.50000000 W
PLW12    0.29166999 W
PLW13    0.14670999 W

F2 - Processing parameters
SI       32768
SF       100.6127690 MHz
WDW      EM
SSB      0
LB       1.00 Hz
GB       0
PC       1.40
  
```

**<sup>1</sup>H and <sup>13</sup>C NMR Spectra of compound 5ah**



DR RA  
PS-02-42 50 (1.852) AM2 (Ar.20000 0.556.28.0.00.LS 10)

1: TOF MS ES+  
5.23e5

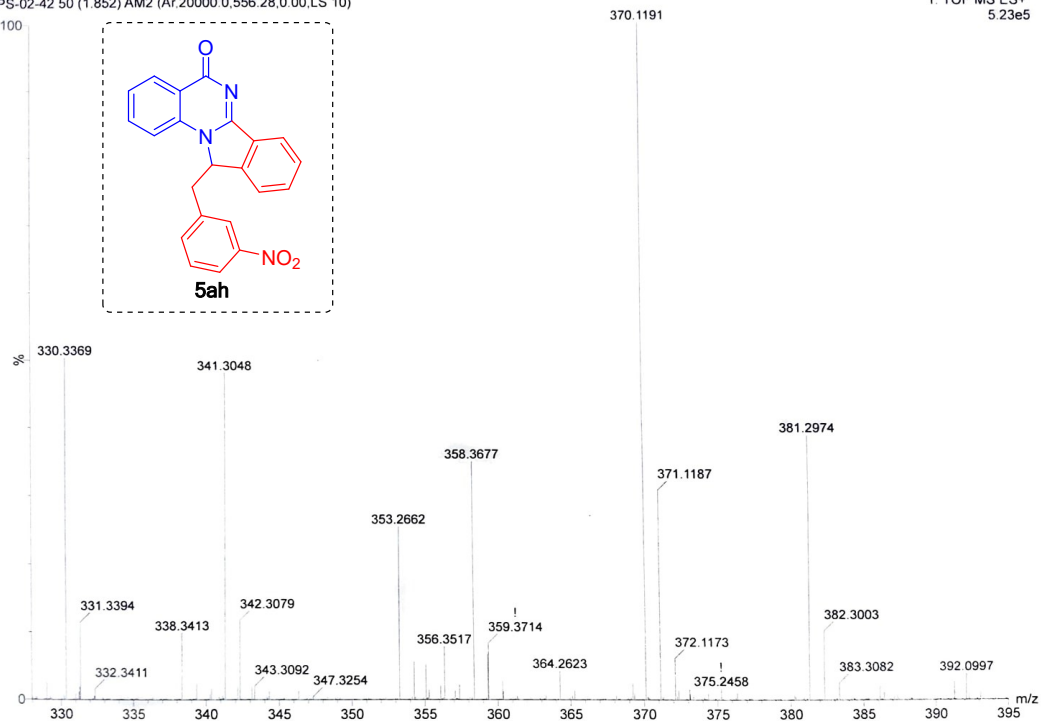

**HRMS Spectrum of compound 5ah**

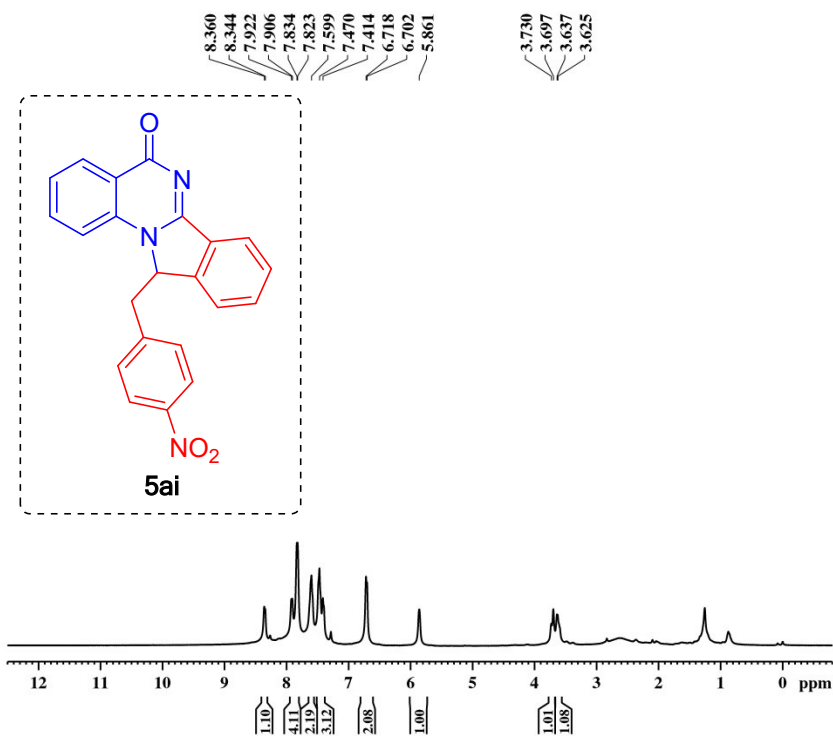

```

Current Data Parameters
NAME      prabu
EXPNO    284
PROCNO   1

F2 - Acquisition Parameters
Date_    20220723
Time     22.22 h
INSTRUM spect
PROBHD   Z129392_0001 (
PULPROG  zg30
TD       65536
SOLVENT  CDCl3
NS       16
DS       2
SWH      8012.820 Hz
FIDRES   0.244532 Hz
AQ       4.0894465 sec
RG       138.85
DW       62.400 usec
DE       6.50 usec
TE       300.5 K
D1       0.50000000 sec
TDO      1
SFO1     400.1320007 MHz
NUC1     1H
P1       15.00 usec
PLW1     10.50000000 W

F2 - Processing parameters
SI       65536
SF       400.1300003 MHz
WDW      EM
SSB      0
LB       0.30 Hz
GB       0
PC       1.00
  
```

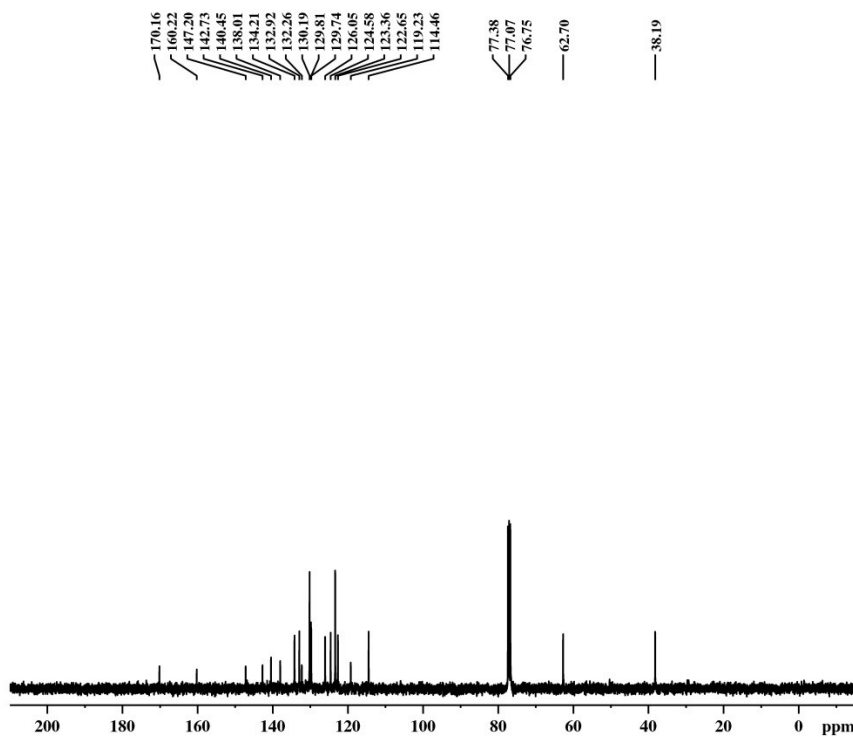

```

Current Data Parameters
NAME      prabu
EXPNO    285
PROCNO   1

F2 - Acquisition Parameters
Date_    20220723
Time     22.29 h
INSTRUM spect
PROBHD   Z129392_0001 (
PULPROG  zgpg30
TD       16540
SOLVENT  CDCl3
NS       256
DS       4
SWH      24038.461 Hz
FIDRES   2.906706 Hz
AQ       0.3440320 sec
RG       200.34
DW       20.800 usec
DE       6.50 usec
TE       301.0 K
D1       1.00000000 sec
D11      0.03000000 sec
TDO      1
SFO1     100.6228289 MHz
NUC1     13C
P1       10.00 usec
PLW1     47.00000000 W
SFO2     400.1316005 MHz
NUC2     1H
CPDPRG2  waltz16
PCPD2    90.00 usec
PLW2     10.50000000 W
PLW12    0.29166999 W
PLW13    0.14670999 W

F2 - Processing parameters
SI       32768
SF       100.6127690 MHz
WDW      EM
SSB      0
LB       1.00 Hz
GB       0
PC       1.40
  
```

**<sup>1</sup>H and <sup>13</sup>C NMR Spectra of compound 5ai**

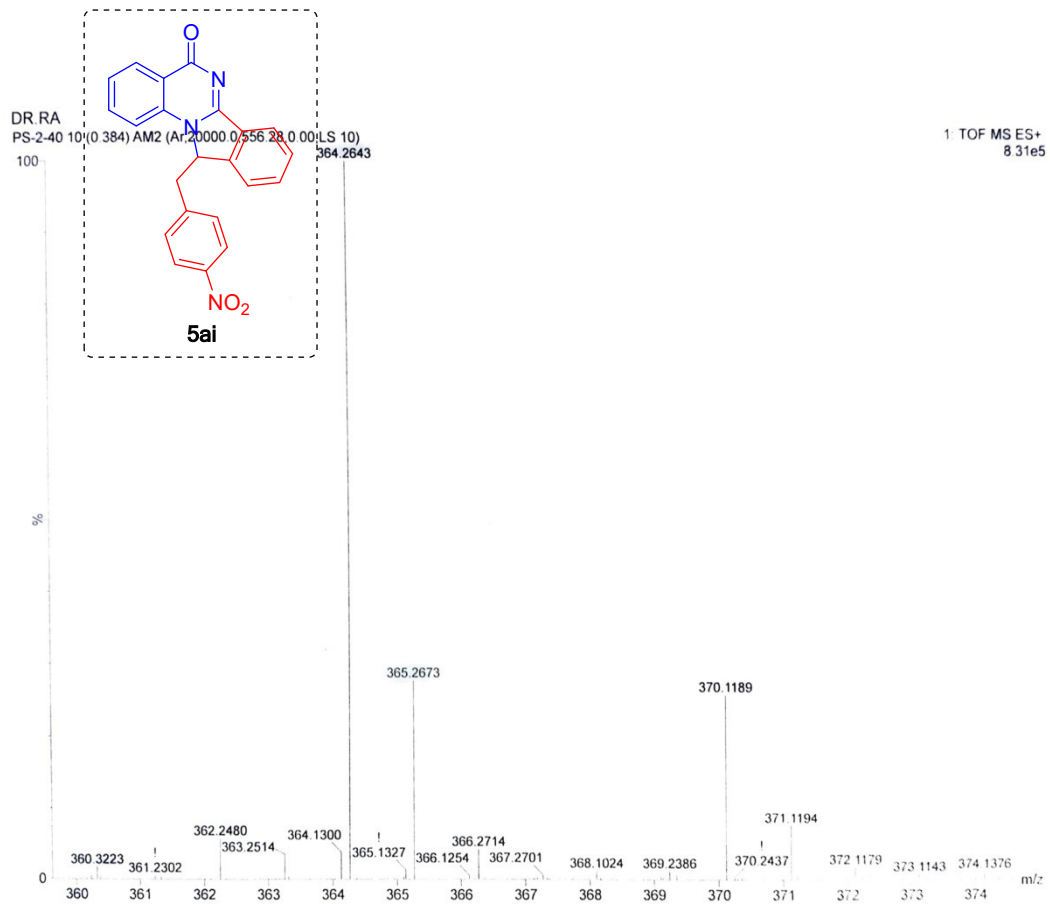

**HRMS Spectrum of compound 5ai**

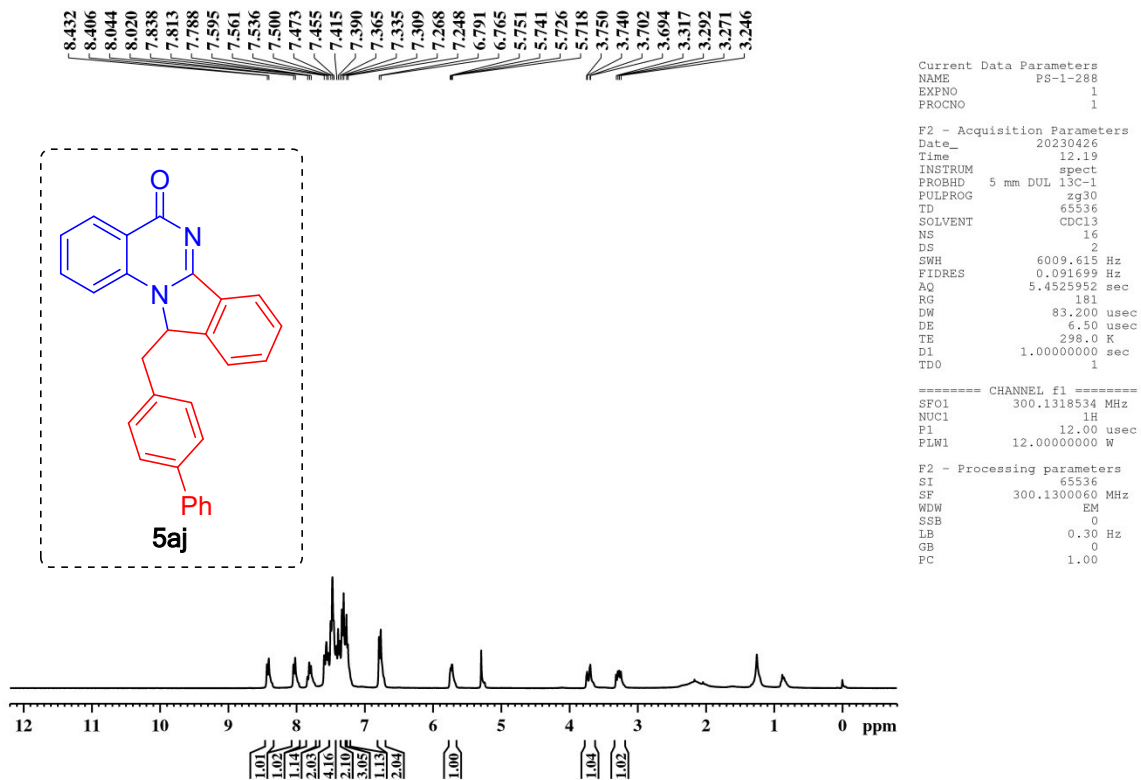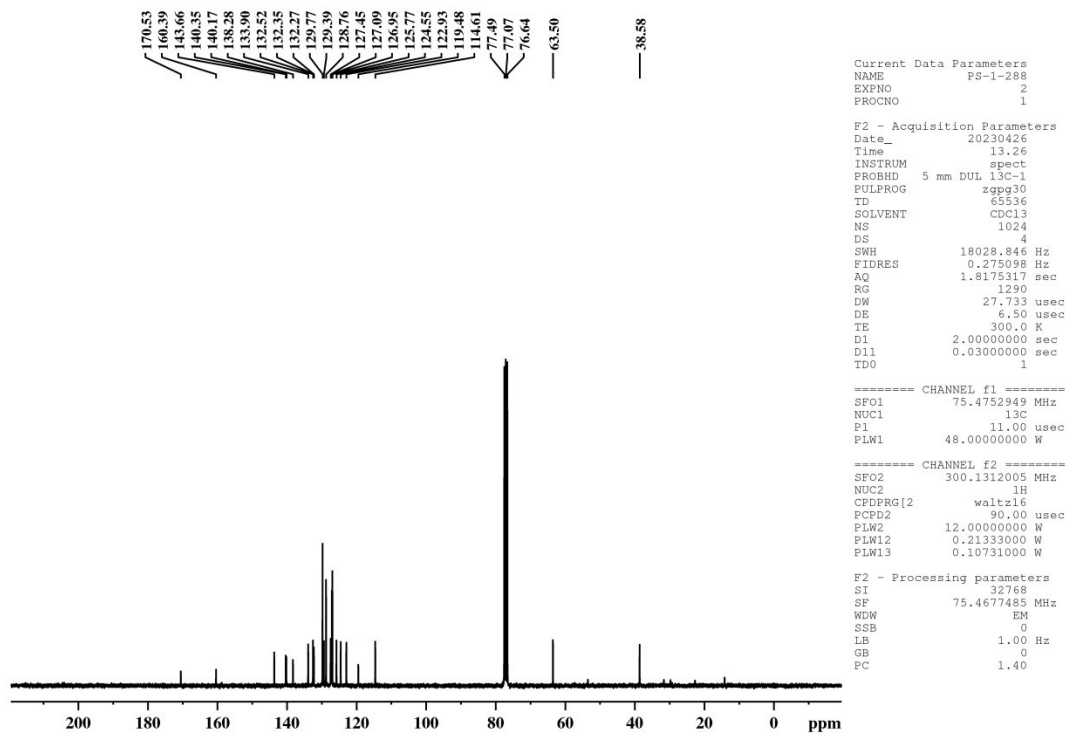

<sup>1</sup>H and <sup>13</sup>C NMR Spectra of compound 5aj

|             |          |                        |         |                 |                      |
|-------------|----------|------------------------|---------|-----------------|----------------------|
| Sample Name | ps-1-288 | Position               | P1-A9   | Instrument Name | Instrument 1         |
| User Name   |          | Inj Vol                | 2       | InjPosition     |                      |
| Sample Type | Sample   | IRM Calibration Status | Success | Data Filename   | 17.06.2022-9.d       |
| ACQ Method  | NITW-W.m | Comment                |         | Acquired Time   | 17-Jun-22 3:36:51 PM |

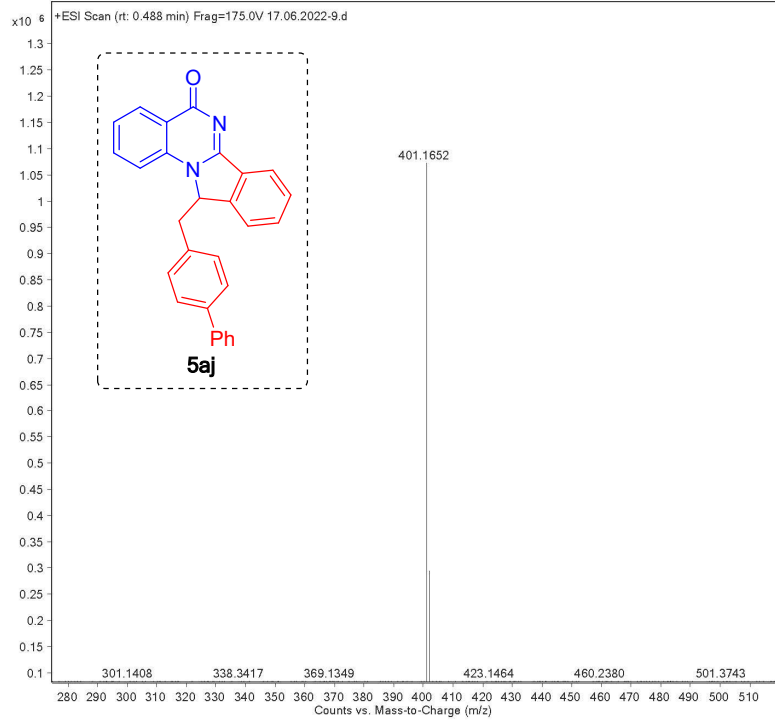

### HRMS Spectrum of compound 5aj

8.453  
8.450  
8.433  
8.430  
8.430  
8.162  
8.143  
7.917  
7.911  
7.902  
7.893  
7.874  
7.868  
7.848  
7.828  
7.746  
7.727  
7.724  
7.519  
7.513  
7.504  
7.488  
7.472  
7.465  
7.454  
7.454  
7.389  
7.372  
7.351  
7.321  
7.319  
7.302  
7.283  
7.264  
7.160  
7.142  
6.558  
6.538  
5.921  
5.908  
5.898  
5.866  
4.284  
4.271  
4.248  
4.236  
3.305  
3.282  
3.269  
3.246

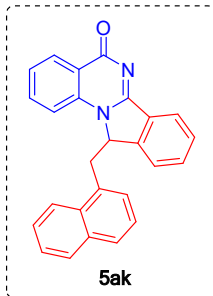

```

Current Data Parameters
NAME      AK-05
EXPNO    1
PROCNO   1

F2 - Acquisition Parameters
Date_    20220921
Time     21.28 h
INSTRUM  Avance Neo 400
PROBHD   Z108618_1053 (
PULPROG  zg30
TD        65536
SOLVENT  CDCl3
NS        16
DS        2
SWH       8196.722 Hz
FIDRES    0.250144 Hz
AQ        3.9976959 sec
RG        101
DW        61.000 usec
DE        12.86 usec
TE        298.1 K
D1        1.00000000 sec
TDO       1
SFO1     400.3024719 MHz
NUC1      1H
PO        4.67 usec
P1        14.00 usec
PLW1     15.77799988 W

F2 - Processing parameters
SI        65536
SF        400.3000086 MHz
WDW       EM
SSB       0
LB        0.30 Hz
GB        0
PC        1.00
  
```

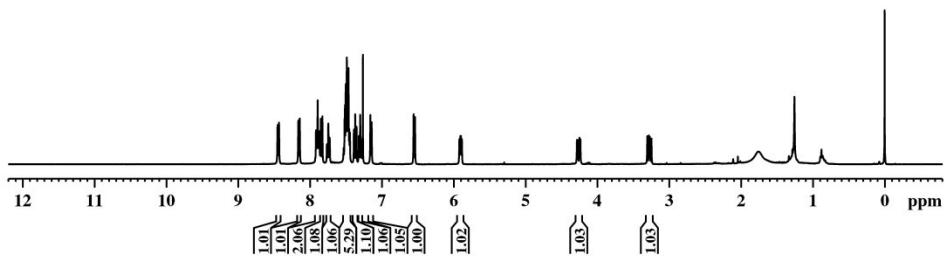

170.59  
160.30  
143.61  
138.39  
133.89  
133.69  
132.04  
131.99  
130.90  
129.73  
129.39  
129.24  
128.67  
128.61  
126.58  
126.08  
125.73  
125.27  
124.60  
123.68  
122.99  
119.65  
114.62  
77.35  
77.04  
76.72  
63.18  
37.38

```

Current Data Parameters
NAME      AK-05
EXPNO    2
PROCNO   1

F2 - Acquisition Parameters
Date_    20220921
Time     22.28 h
INSTRUM  Avance Neo 400
PROBHD   Z108618_1053 (
PULPROG  zgpg30
TD        65536
SOLVENT  CDCl3
NS        1024
DS        4
SWH       23809.523 Hz
FIDRES    0.726609 Hz
AQ        1.3762560 sec
RG        16.25
DW        21.000 usec
DE        6.50 usec
TE        298.1 K
D1        2.00000000 sec
D11       0.03000000 sec
TDO       1
SFO1     100.655806 MHz
NUC1      13C
PO        3.33 usec
P1        10.00 usec
PLW1     54.28300095 W
SFO2     400.3016012 MHz
NUC2      1H
CPDPRG[2] waltz65
PCPDZ    90.00 usec
PLW2     15.77799988 W
PLW12    0.38179001 W
PLW13    0.19204000 W

F2 - Processing parameters
SI        32768
SF        100.6555151 MHz
WDW       EM
SSB       0
LB        1.00 Hz
GB        0
PC        1.40
  
```

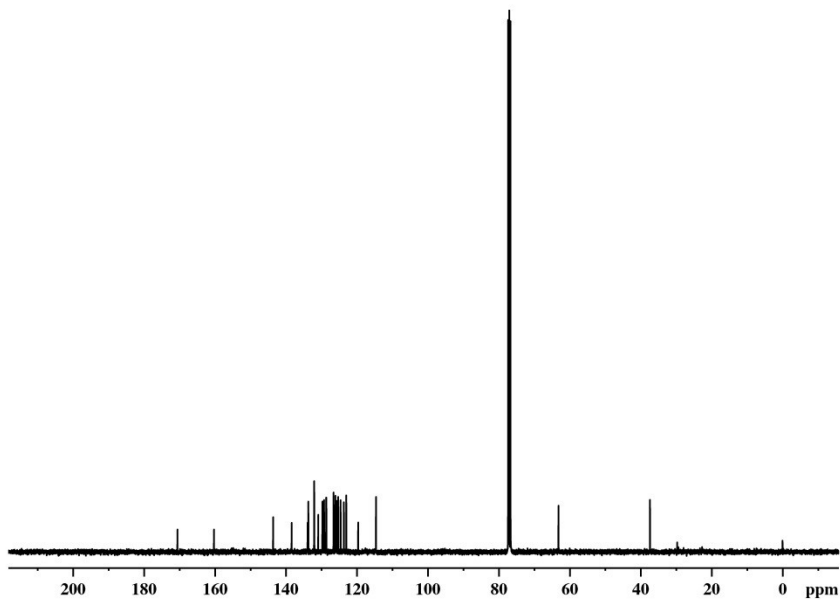

<sup>1</sup>H and <sup>13</sup>C NMR Spectra of compound 5ak

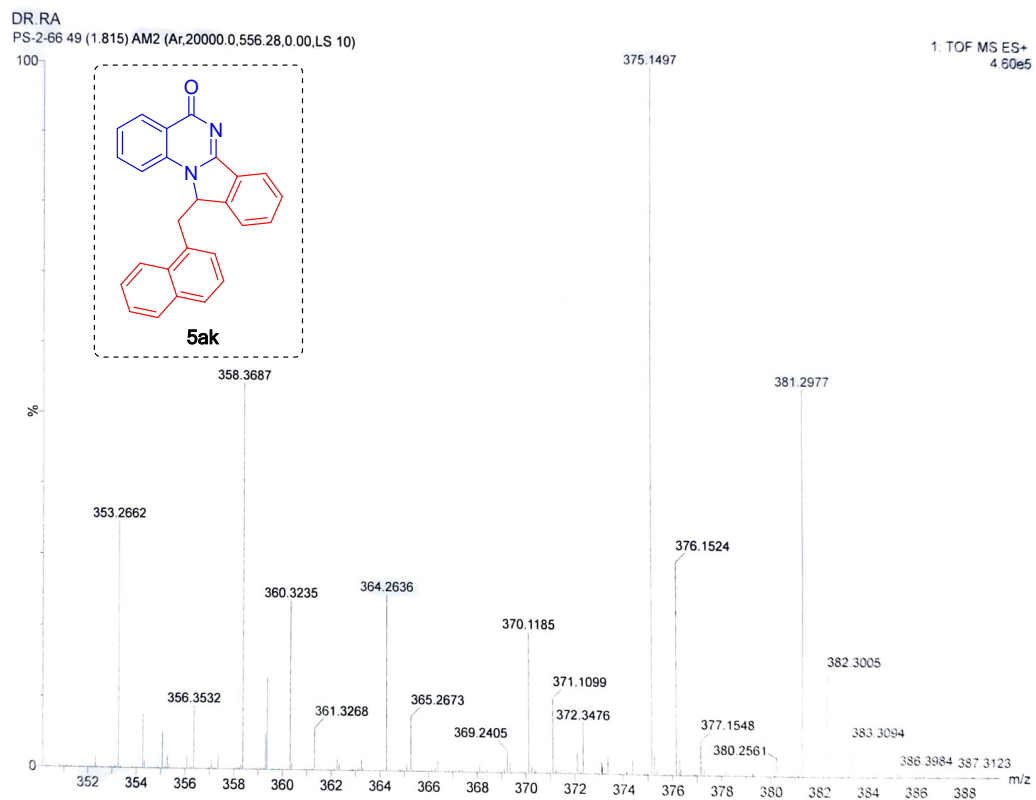

**RMS Spectrum of compound 5ak**

**H**

8.242  
8.222  
7.702  
7.684  
7.665  
7.439  
7.419  
7.350  
7.331  
7.312  
7.222  
7.204  
7.076  
7.058  
7.040  
7.026  
7.008  
6.991  
6.641  
6.623  
6.493  
5.999  
5.977  
5.529  
5.517  
3.563  
3.545  
3.510  
3.141  
3.123  
3.106  
3.088

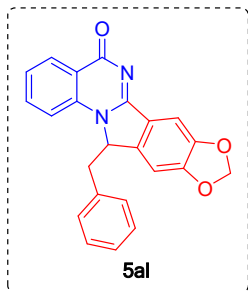

```
Current Data Parameters
NAME      PG-1-231-H-NMR
EXPNO    1
PROCNO   1

F2 - Acquisition Parameters
Date_    20220705
Time     9.55 h
INSTRUM  spect
PROBHD   Z108618_0738 (
PULPROG  zg30
TD       65536
SOLVENT  CDCl3
NS       16
DS       2
SWH      8012.820 Hz
FIDRES   0.244532 Hz
AQ       4.0894465 sec
RG       31.07
DW       62.400 usec
DE       6.50 usec
TE       300.1 K
D1       1.00000000 sec
TDO      1
SFO1     400.1324708 MHz
NUC1     1H
P1       15.00 usec
PLW1     13.03199959 W

F2 - Processing parameters
SI       65536
SF       400.1300321 MHz
WDW      EM
SSB      0
LB       0.30 Hz
GB       0
PC       1.00
```

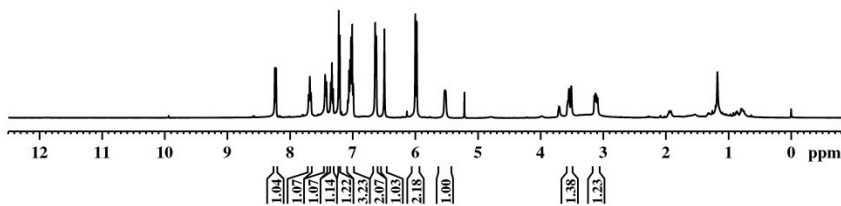

169.98  
159.95  
152.33  
148.99  
140.06  
138.20  
133.93  
133.13  
129.46  
129.23  
128.50  
127.56  
125.55  
125.43  
118.86  
114.55  
103.49  
103.37  
102.44  
77.42  
77.10  
76.78  
63.20  
38.87

```
Current Data Parameters
NAME      PG-1-231-C13-NMR
EXPNO    2
PROCNO   1

F2 - Acquisition Parameters
Date_    20220707
Time     19.11 h
INSTRUM  spect
PROBHD   Z108618_0738 (
PULPROG  zgpg30
TD       65536
SOLVENT  CDCl3
NS       685
DS       4
SWH      24038.461 Hz
FIDRES   0.733596 Hz
AQ       1.3631488 sec
RG       200.47
DW       20.800 usec
DE       6.50 usec
TE       300.3 K
D1       3.00000000 sec
D11      0.03000000 sec
TDO      1
SFO1     100.6228298 MHz
NUC1     13C
P1       10.00 usec
PLM1     51.31299973 W
SFO2     400.1316005 MHz
NUC2     1H
CPDPRG2  waltz16
PCPD2    90.00 usec
PLM2     13.03199959 W
PLM12    0.36199999 W
PLM13    0.18208000 W

F2 - Processing parameters
SI       32768
SF       100.6127685 MHz
WDW      EM
SSB      0
LB       2.00 Hz
GB       0
PC       1.40
```

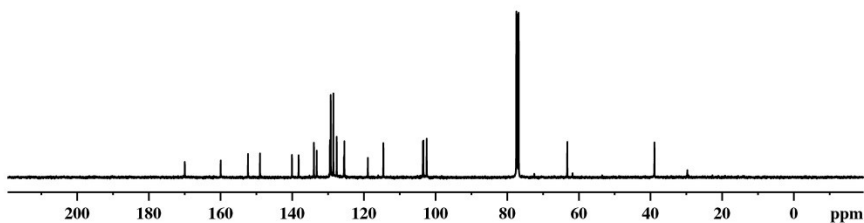

**<sup>1</sup>H and <sup>13</sup>C NMR Spectra of compound 5al**



|             |          |                        |         |                 |                      |
|-------------|----------|------------------------|---------|-----------------|----------------------|
| Sample Name | ps-1-231 | Position               | P1-A4   | Instrument Name | Instrument 1         |
| User Name   |          | Inj Vol                | 2       | InjPosition     |                      |
| Sample Type | Sample   | IRM Calibration Status | Success | Data Filename   | 17.06.2022-4.d       |
| ACQ Method  | NITW-W.m | Comment                |         | Acquired Time   | 17-Jun-22 3:16:59 PM |

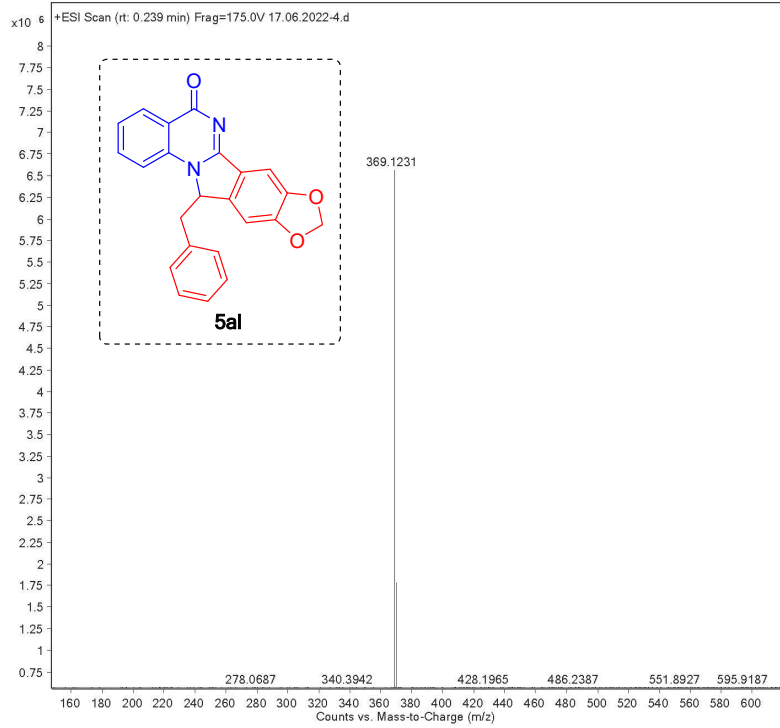

## HRMS Spectrum of compound 5al

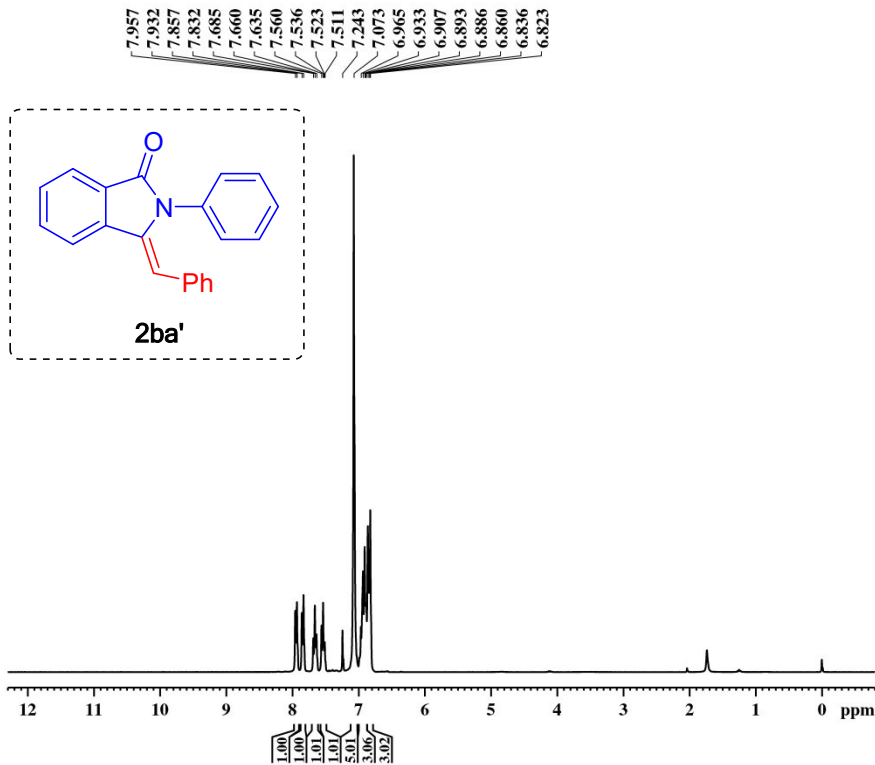

```

Current Data Parameters
NAME      RA-PS-2-219B
EXPNO    1
PROCNO    1

F2 - Acquisition Parameters
Date_    20230106
Time     13.26
INSTRUM  spect
PROBHD   5 mm DUL 13C-1
PULPROG  zg30
TD       65536
SOLVENT  CDCl3
NS       16
DS       2
SWH      6009.615 Hz
FIDRES   0.091699 Hz
AQ       5.4525952 sec
RG       128
DW       83.200 usec
DE       6.50 usec
TE       298.0 K
D1       1.0000000 sec
TDO      1

----- CHANNEL f1 -----
SFO1    300.1318534 MHz
NUC1     1H
P1      12.00 usec
PLW1    12.00000000 W

F2 - Processing parameters
SI      65536
SF      300.1300124 MHz
WDW     EM
SSB     0
LB      0.30 Hz
GB      0
PC      1.00

```

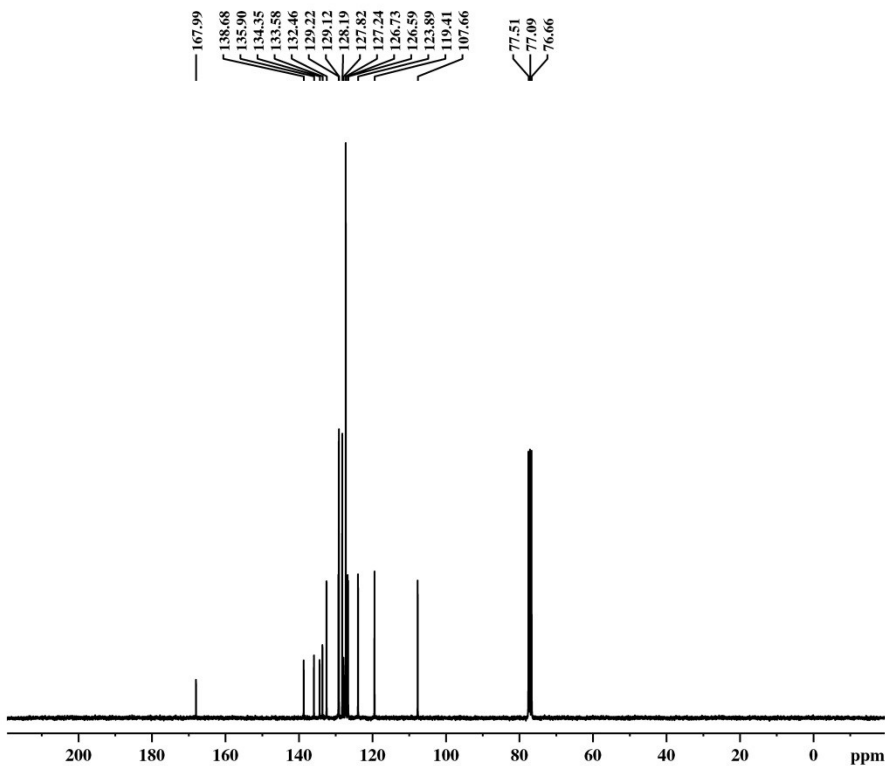

```

Current Data Parameters
NAME      RA-PS-2-219B
EXPNO    2
PROCNO    1

F2 - Acquisition Parameters
Date_    20230106
Time     14.34
INSTRUM  spect
PROBHD   5 mm DUL 13C-1
PULPROG  zgpg30
TD       65536
SOLVENT  CDCl3
NS       1024
DS       4
SWH      18028.846 Hz
FIDRES   0.275098 Hz
AQ       1.8175317 sec
RG       912
DW       27.733 usec
DE       6.50 usec
TE       300.0 K
D1       2.0000000 sec
D11      0.03000000 sec
TDO      1

----- CHANNEL f1 -----
SFO1    75.4752949 MHz
NUC1    13C
P1      11.00 usec
PLW1    48.00000000 W

----- CHANNEL f2 -----
SFO2    300.1312005 MHz
NUC2     1H
CPDPRG2  waltz16
PCPD2    90.00 usec
PLW2    12.00000000 W
PLW12   0.21333000 W
PLW13   0.10731000 W

F2 - Processing parameters
SI      32768
SF      75.4677485 MHz
WDW     EM
SSB     0
LB      1.00 Hz
GB      0
PC      1.40

```

**<sup>1</sup>H and <sup>13</sup>C NMR Spectra of compound 2aa'**

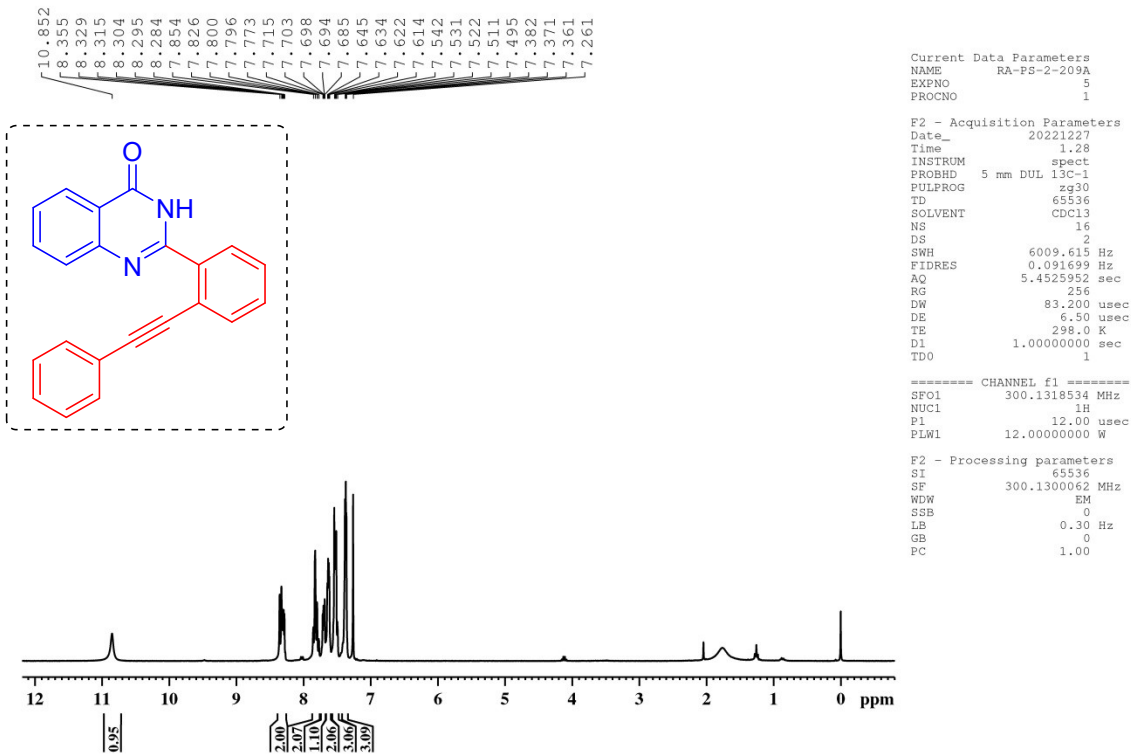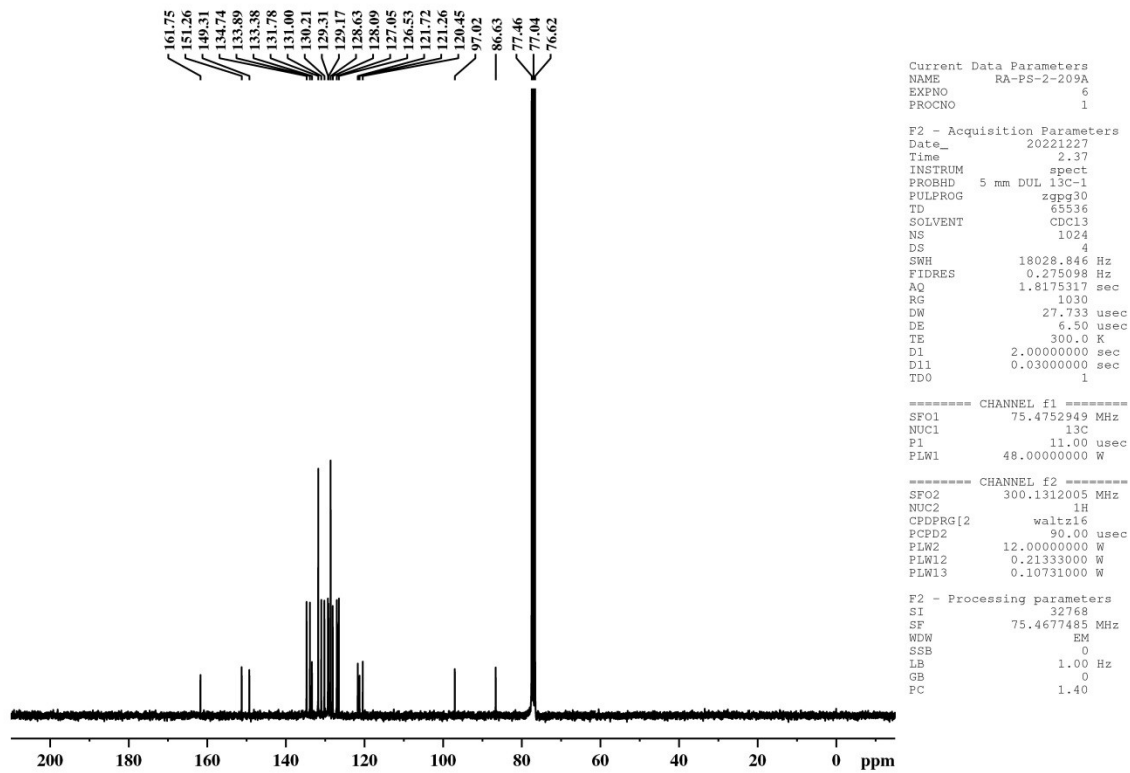

<sup>1</sup>H and <sup>13</sup>C NMR Spectra of compound G
